# Supplementary material for: Screening of efficient siRNA carriers in a library of surface-engineered dendrimers
Source: PubMed Central journal article supplement (PMC4848513; doi:10.1038/srep25069), 2016-04-28

# Supplementary Information

Screening of efficient siRNA carriers in a library of  
surface-engineered dendrimers

*Hongmei Liu,<sup>†</sup> Hong Chang,<sup>†</sup> Jia Lv,<sup>†</sup> Cong Jiang, Zhenxi Li, Fei Wang, Hui Wang,  
Mingming Wang, Chongyi Liu, Xinyu Wang, Naimin Shao, Bingwei He, Wanwan  
Shen, Qiang Zhang, Yiyun Cheng\**

Shanghai Key Laboratory of Regulatory Biology, School of Life Sciences, East China  
Normal University, Shanghai, 200241, P.R. China

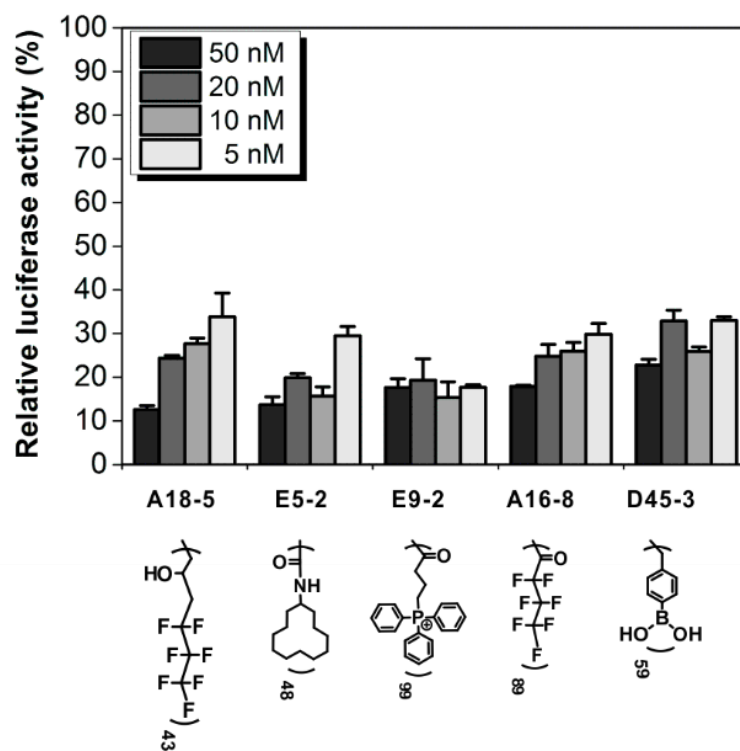

**Fig. S1.** siRNA dose-dependent efficacies of the screened materials. The used siRNA doses are 5, 10, 20 and 50 nM, respectively. Error bars represent the s.e. (n =3).

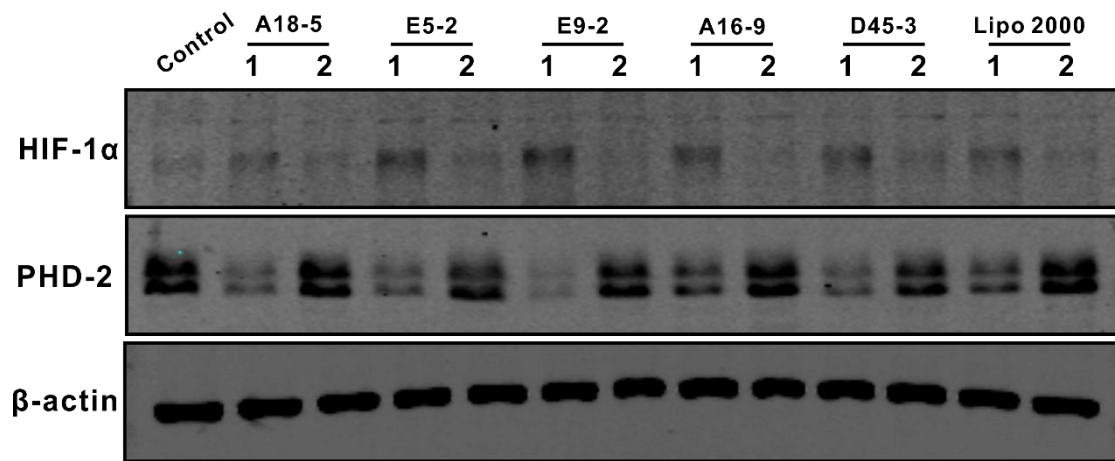

**Fig. S2.** Western blotting analysis for detection of PHD2 and HIF-1 $\alpha$  in the transfected NIH3T3 cells. 50 nM siPHD2 were used. Non-transfected cells were shown as “Control”. “1” and “2” in above figure mean the cells were transfected with materials/siPHD2 and materials/siNC, respectively.

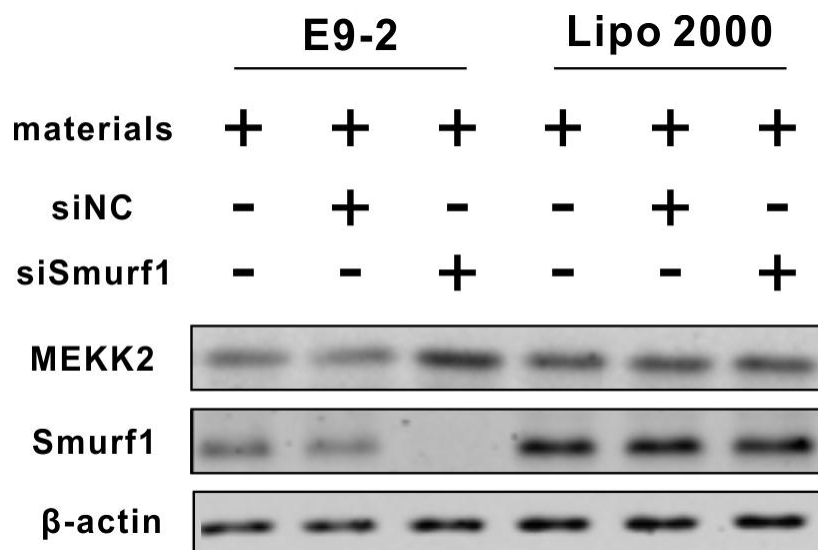

**Fig. S3.** Western blotting analysis for detection of Smurf1 and MEKK2 in the transfected primary mouse mesenchymal stem cells. 50 nM siSmurf1 were used.



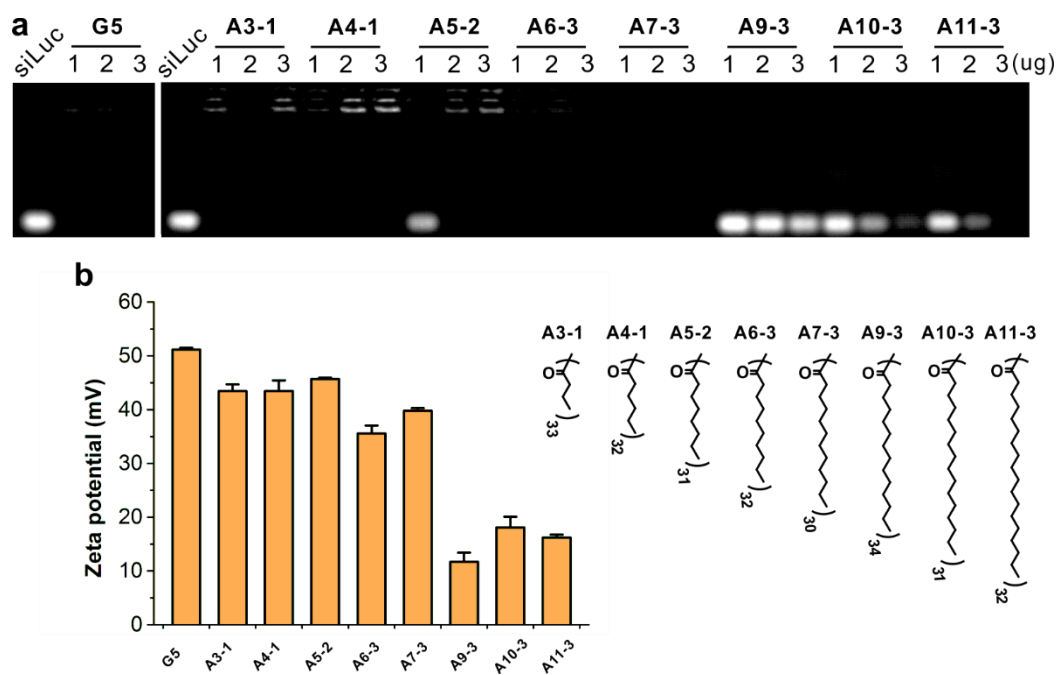

**Fig. S4.** Comparisons of the alkyl chain-modified dendrimers on siRNA binding capacity. (a) Agarose gel electrophoresis assay. (b) Zeta potential analysis. The zeta potentials of alkyl chain-modified dendrimers were measured at their optimal transfection concentrations. The optimal weight ratios for G5, A3-1, A4-1, A5-2, A6-3, A7-3, A9-3, A10-3 and A11-3 are 12, 12, 20, 10, 2, 3, 4, 4 and 4, respectively. 0.5  $\mu$ g siLuc is used for each complex. Error bars in b represent the s.e. ( $n = 3$ ).

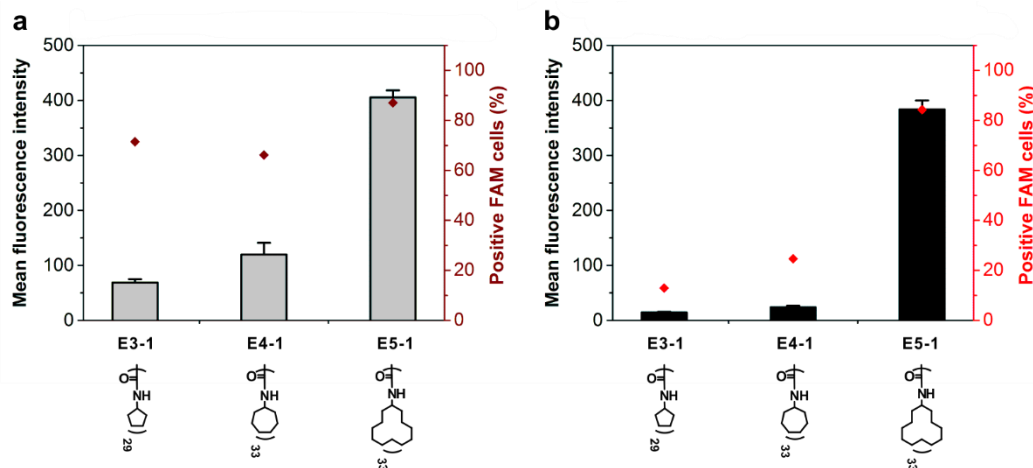

**Fig. S5.** Cellular uptake efficacy of cycloalkane-modified dendrimer/siRNA complexes in HeLa-Luc cells. (a) At optimal weight ratios as shown in Figure 5b. The optimal weight ratios for E3-1, E4-1 and E5-1 are 12, 8 and 2, respectively. (b) At an equal polymer molar concentration of 112 nM (112 nM is the optimal concentration for cyclododecane-modified G5 PAMAM dendrimer). 0.5  $\mu$ g siLuc is used for each well and the cellular uptake experiments were conducted for 2 h. Error bars in a and b represent the s.e. (n=3).

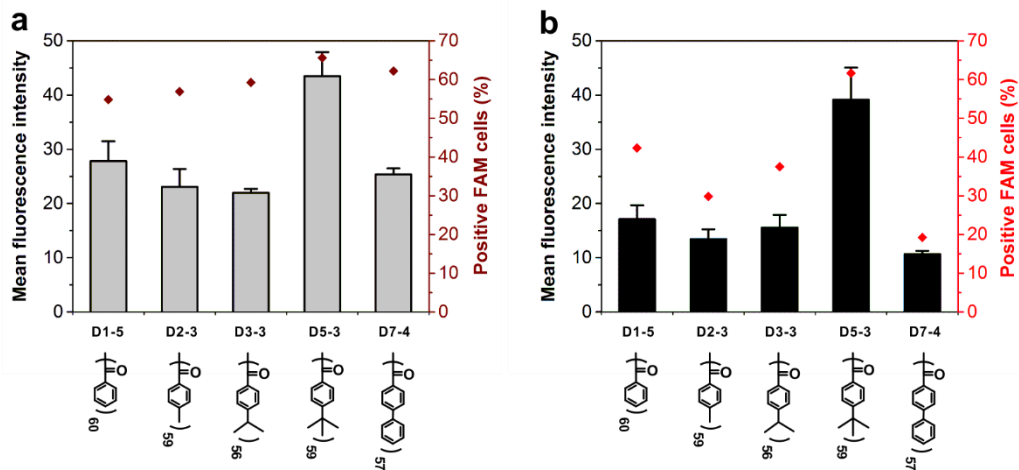

**Fig. S6.** Cellular uptake efficacy of aromatic ligand-modified dendrimer/siRNA complexes in HeLa-Luc cells. (a) At optimal weight ratios as shown in Figure 5c. The optimal weight ratios for D1-5, D2-3, D3-3, D5-3 and D7-4 are 12, 16, 8, 3 and 16, respectively. (b) At an equal polymer molar concentration of 157 nM (157 nM is the optimal concentration for 4-tert-butylbenzoic acid-modified G5 PAMAM dendrimer). 0.5  $\mu$ g siLuc is used for each well and the cellular uptake experiments were conducted for 2 h. Error bars in a and b represent the s.e. (n=3).

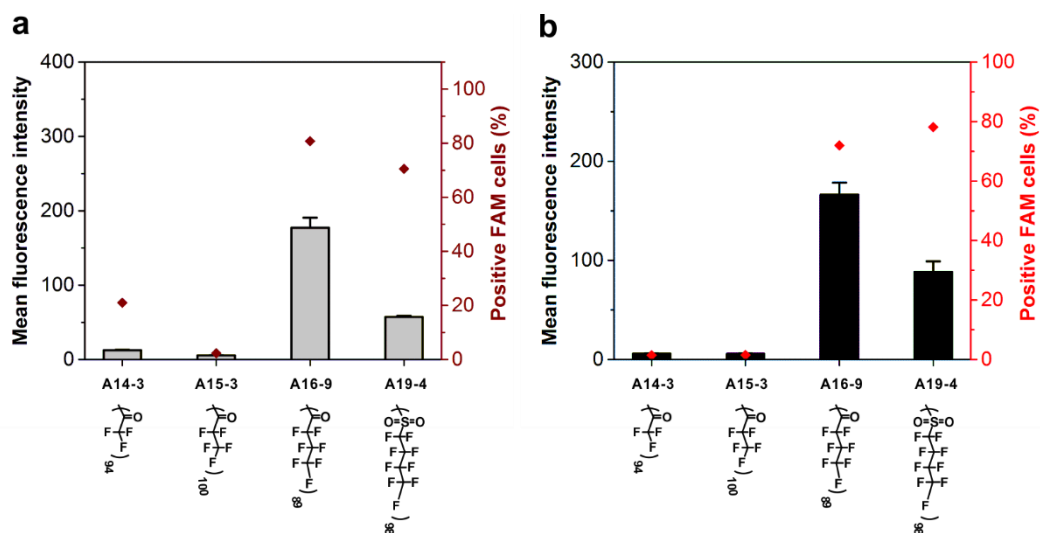

**Fig. S7.** Cellular uptake efficacy of fluoroalkyl chain-modified dendrimer/siRNA complexes in HeLa-Luc cells. (a) At optimal weight ratios as shown in Figure 5d. The optimal weight ratios for A14-3, A15-3, A16-9 and A19-4 are 20, 8, 3 and 20, respectively. (b) At an equal polymer molar concentration of 130 nM (130 nM is the optimal concentration for heptafluorobutyric acid-modified G5 PAMAM dendrimer). 0.5  $\mu$ g siLuc is used for each well and the cellular uptake experiments were conducted for 2 h. Error bars in a and b represent the s.e. (n=3).

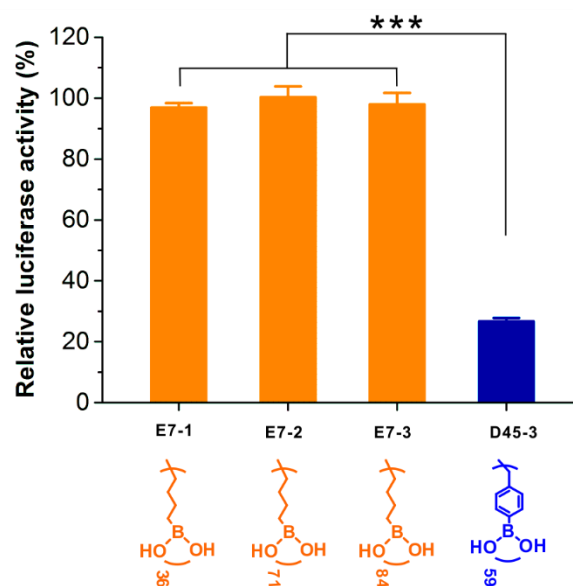

**Fig. S8.** Gene silencing efficacy of phenylboronic acid- and butylboronic acid-modified G5 PAMAM dendrimers. The gene silencing experiments were conducted at the optimal transfection condition for each material in HeLa-Luc cells. 50 nM siLuc is used for each transfection. The gene silencing experiments continue for 24 h. The optimal weight ratios for E7-1, E7-2, E7-3 and D45-3 are 8, 16, 4 and 20, respectively. Error bars represent the s.e. (n=3). \*\*\*P < 0.005 analyzed by students't-test.

**Table S1. Characterization of surface-engineered G5 PAMAM dendrimers.**

| Ligand | Chemical                                                                                                    | Reaction condition | Fed <sup>#</sup> | Conjugated      | RLA*   | NO.             | Name |
|--------|-------------------------------------------------------------------------------------------------------------|--------------------|------------------|-----------------|--------|-----------------|------|
| A1     | Acetic anhydride<br>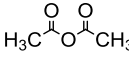       | Methanol/TE<br>A   | 32               | 33 <sup>a</sup> | 102.93 | 1               | A1-1 |
|        |                                                                                                             |                    | 64               | 54 <sup>a</sup> | 105.60 | 2               | A1-2 |
| A2     | Propionic anhydride<br>    | Methanol/TE<br>A   | 32               | 30 <sup>a</sup> | 102.02 | 3               | A2-1 |
|        |                                                                                                             |                    | 64               | 59 <sup>a</sup> | 107.05 | 4               | A2-2 |
| A3     | Butyric anhydride<br>      | Methanol/TE<br>A   | 32               | 33 <sup>a</sup> | 97.59  | 5               | A3-1 |
|        |                                                                                                             |                    | 64               | 55 <sup>a</sup> | 97.30  | 6               | A3-2 |
|        |                                                                                                             |                    | 68               | 69 <sup>a</sup> | 99.14  | 7               | A3-3 |
| A4     | Hexanoic anhydride<br>    | Methanol/TE<br>A   | 32               | 32 <sup>a</sup> | 102.39 | 8               | A4-1 |
|        |                                                                                                             |                    | 64               | 60 <sup>a</sup> | 100.88 | 9               | A4-2 |
| A5     | Octanoic anhydride<br>   | Methanol/TE<br>A   | 16               | 15 <sup>a</sup> | 75.64  | 10              | A5-1 |
|        |                                                                                                             |                    | 32               | 31 <sup>a</sup> | 62.57  | 11              | A5-2 |
| A6     | Decanoic anhydride<br>   | Methanol/TE<br>A   | 8                | 8 <sup>a</sup>  | 95.18  | 12              | A6-1 |
|        |                                                                                                             |                    | 16               | 12 <sup>a</sup> | 85.06  | 13              | A6-2 |
|        |                                                                                                             |                    | 32               | 32 <sup>a</sup> | 52.12  | 14              | A6-3 |
| A7     | Dodecanoic anhydride<br> | Methanol/TE<br>A   | 8                | 9 <sup>a</sup>  | 63.76  | 15              | A7-1 |
|        |                                                                                                             |                    | 16               | 14 <sup>a</sup> | 39.21  | 16              | A7-2 |
|        |                                                                                                             |                    | 32               | 30 <sup>a</sup> | 42.32  | 17              | A7-3 |
| A8     | Dodecyl isocyanate<br>CH <sub>3</sub> (CH <sub>2</sub> ) <sub>10</sub> CH <sub>2</sub> -N=C=O               | Methanol           | 8                | 10 <sup>a</sup> | 53.03  | 18              | A8-1 |
|        |                                                                                                             |                    | 16               | 17 <sup>a</sup> | 51.89  | 19              | A8-2 |
|        |                                                                                                             |                    | 32               | 32 <sup>a</sup> | 54.93  | 20 <sup>d</sup> | A8-3 |
|        |                                                                                                             |                    | 48               | 48 <sup>a</sup> | 44.24  | 21 <sup>d</sup> | A8-4 |

|     |                                                                                                                       |                  |     |                  |        |                 |       |
|-----|-----------------------------------------------------------------------------------------------------------------------|------------------|-----|------------------|--------|-----------------|-------|
| A9  | Myristic acid<br>$\text{CH}_3(\text{CH}_2)_{12}\text{COOH}$                                                           | DCC/NHS/T<br>EA  | 16  | 3 <sup>a</sup>   | 96.29  | 22              | A9-1  |
|     |                                                                                                                       |                  | 32  | 14 <sup>a</sup>  | 103.49 | 23              | A9-2  |
|     |                                                                                                                       |                  | 48  | 34 <sup>a</sup>  | 109.28 | 24 <sup>d</sup> | A9-3  |
|     |                                                                                                                       |                  | 64  | 41 <sup>a</sup>  | 90.14  | 25 <sup>d</sup> | A9-4  |
| A10 | Palmitic acid<br>$\text{CH}_3(\text{CH}_2)_{14}\text{COOH}$                                                           | DCC/NHS/T<br>EA  | 16  | 4 <sup>a</sup>   | 94.28  | 26              | A10-1 |
|     |                                                                                                                       |                  | 32  | 16 <sup>a</sup>  | 99.6   | 27              | A10-2 |
|     |                                                                                                                       |                  | 48  | 31 <sup>a</sup>  | 109.90 | 28 <sup>d</sup> | A10-3 |
| A11 | Stearic acid<br>$\text{CH}_3(\text{CH}_2)_{16}\text{COOH}$                                                            | DCC/NHS/T<br>EA  | 16  | 4 <sup>a</sup>   | 95.56  | 29              | A11-1 |
|     |                                                                                                                       |                  | 32  | 12 <sup>a</sup>  | 89.24  | 30              | A11-2 |
|     |                                                                                                                       |                  | 48  | 32 <sup>a</sup>  | 98.79  | 31 <sup>d</sup> | A11-3 |
| A12 | Oleic acid<br>$\text{CH}_3(\text{CH}_2)_7\text{CH}=\text{CH}(\text{CH}_2)_7\text{COOH}$                               | DCC/NHS/T<br>EA  | 16  | 4 <sup>a</sup>   | 92.81  | 32              | A12-1 |
|     |                                                                                                                       |                  | 32  | 15 <sup>a</sup>  | 90.73  | 33              | A12-2 |
|     |                                                                                                                       |                  | 48  | 22 <sup>a</sup>  | 89.39  | 34              | A12-3 |
|     |                                                                                                                       |                  | 64  | 42 <sup>a</sup>  | 90.22  | 35 <sup>d</sup> | A12-4 |
| A13 | Linoleic acid<br>$\text{CH}_3(\text{CH}_2)_4\text{CH}=\text{CHCH}_2\text{CH}=\text{CH}(\text{CH}_2)_7\text{COOH}$     | DCC/NHS/<br>TEA  | 128 | 43 <sup>a</sup>  | 107.22 | 36 <sup>d</sup> | A13-1 |
|     |                                                                                                                       |                  | 256 | NA               | /      | /               | /     |
| A14 | Trifluoroacetic anhydride<br>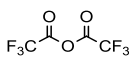      | Methanol/TE<br>A | 32  | 26 <sup>b</sup>  | 97     | 37              | A14-1 |
|     |                                                                                                                       |                  | 64  | 47 <sup>b</sup>  | 99.66  | 38              | A14-2 |
|     |                                                                                                                       |                  | 128 | 94 <sup>b</sup>  | 95.78  | 39              | A14-3 |
| A15 | Pentafluoropropionic anhydride<br> | Methanol/TE<br>A | 32  | 36 <sup>b</sup>  | 93.88  | 40              | A15-1 |
|     |                                                                                                                       |                  | 64  | 61 <sup>b</sup>  | 106.72 | 41              | A15-2 |
|     |                                                                                                                       |                  | 128 | 100 <sup>b</sup> | 98.10  | 42              | A15-3 |
| A16 | Heptafluorobutyric anhydride<br>   | Methanol/TE<br>A | 32  | 24 <sup>b</sup>  | 96.97  | 43              | A16-1 |
|     |                                                                                                                       |                  | 50  | 40 <sup>b</sup>  | 104.60 | 44              | A16-2 |

|     |                                                                                                                                                     |                     |     |                  |        |    |       |
|-----|-----------------------------------------------------------------------------------------------------------------------------------------------------|---------------------|-----|------------------|--------|----|-------|
|     |                                                                                                                                                     |                     | 55  | 44 <sup>b</sup>  | 93.88  | 45 | A16-3 |
|     |                                                                                                                                                     |                     | 60  | 53 <sup>b</sup>  | 52.49  | 46 | A16-4 |
|     |                                                                                                                                                     |                     | 66  | 59 <sup>b</sup>  | 76.57  | 47 | A16-5 |
|     |                                                                                                                                                     |                     | 70  | 66 <sup>b</sup>  | 32.11  | 48 | A16-6 |
|     |                                                                                                                                                     |                     | 72  | 74 <sup>b</sup>  | 41.82  | 49 | A16-7 |
|     |                                                                                                                                                     |                     | 82  | 82 <sup>b</sup>  | 36.68  | 50 | A16-8 |
|     |                                                                                                                                                     |                     | 85  | 89 <sup>b</sup>  | 26.63  | 51 | A16-9 |
|     |                                                                                                                                                     |                     | 96  | NA               | /      | /  | /     |
| A17 | [2,3,3,3-Tetrafluoro-2-(trifluoromethoxy)propyl]oxirane<br>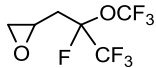        | 50% Ethanol         | 32  | 19 <sup>b</sup>  | 90.13  | 52 | A17-1 |
|     |                                                                                                                                                     |                     | 64  | 25 <sup>b</sup>  | 99.7   | 53 | A17-2 |
|     |                                                                                                                                                     |                     | 96  | 29 <sup>b</sup>  | 98.93  | 54 | A17-3 |
| A18 | 3-(Perfluoropropyl)-1,2-propoxide<br>                            | 50% Ethanol         | 96  | 6 <sup>a</sup>   | 88.44  | 55 | A18-1 |
|     |                                                                                                                                                     |                     | 128 | 23 <sup>a</sup>  | 82.42  | 56 | A18-2 |
|     |                                                                                                                                                     |                     | 160 | 25 <sup>a</sup>  | 81.09  | 57 | A18-3 |
|     |                                                                                                                                                     |                     | 256 | 34 <sup>a</sup>  | 44.99  | 58 | A18-4 |
|     |                                                                                                                                                     |                     | 384 | 43 <sup>a</sup>  | 19.39  | 59 | A18-5 |
| A19 | Nonafluorobutanesulfonic anhydride<br>                           | Ethanol/TEA         | 32  | 32 <sup>b</sup>  | 97.05  | 60 | A19-1 |
|     |                                                                                                                                                     |                     | 64  | 63 <sup>b</sup>  | 97.43  | 61 | A19-2 |
|     |                                                                                                                                                     |                     | 96  | 82 <sup>b</sup>  | 90.98  | 62 | A19-3 |
|     |                                                                                                                                                     |                     | 128 | 98 <sup>b</sup>  | 103.89 | 63 | A19-4 |
| A20 | 2-Chloro-4,6-bis[3-(perfluorohexyl)propyloxy]-1,3,5-triazine<br> | 50% Ethanol<br>90°C | 2   | 1.3 <sup>c</sup> | 101.47 | 64 | A20-1 |
|     |                                                                                                                                                     |                     | 8   | 8.5 <sup>c</sup> | 56.05  | 65 | A20-2 |
|     |                                                                                                                                                     |                     | 10  | 9.5 <sup>c</sup> | 68.62  | 66 | A20-3 |



|     |                                                                                                                                                       |                           |     |                  |        |    |       |
|-----|-------------------------------------------------------------------------------------------------------------------------------------------------------|---------------------------|-----|------------------|--------|----|-------|
|     |                                                                                                                                                       |                           | 20  | NA               | /      | /  | /     |
| A21 | (2,2,3,3,4,4,5,5,6,6,7,7,8,8,9,9,9-Heptafluorooxonyl)oxirane<br><br>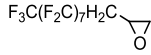 | DMSO                      | 32  | 5 <sup>b</sup>   | 98.15  | 67 | A21-1 |
|     |                                                                                                                                                       |                           | 64  | 14 <sup>b</sup>  | 80.76  | 68 | A21-2 |
|     |                                                                                                                                                       |                           | 88  | 18 <sup>b</sup>  | 77.84  | 69 | A21-3 |
| B1  | Boc-Gly-OH<br><br>                                                   | (1)DCC/NHS<br>/TEA (2)TFA | 83  | 52 <sup>a</sup>  | 99.44  | 70 | B1-1  |
|     |                                                                                                                                                       |                           | 166 | 108 <sup>a</sup> | 88.51  | 71 | B1-2  |
| B2  | Boc-Ala-OH<br><br>                                                   | (1)DCC/NHS<br>/TEA (2)TFA | 83  | 73 <sup>a</sup>  | 89.64  | 72 | B2-1  |
|     |                                                                                                                                                       |                           | 166 | 114 <sup>a</sup> | 107.13 | 73 | B2-2  |
| B3  | Boc-Val-OH<br><br>                                                   | (1)DCC/NHS<br>/TEA (2)TFA | 83  | 77 <sup>a</sup>  | 99.44  | 74 | B3-1  |
|     |                                                                                                                                                       |                           | 166 | 113 <sup>a</sup> | 105.08 | 75 | B3-2  |
| B4  | Boc-Leu-OH<br><br>                                                 | (1)DCC/NHS<br>/TEA (2)TFA | 71  | 71 <sup>a</sup>  | 96.88  | 76 | B4-1  |
|     |                                                                                                                                                       |                           | 83  | 81 <sup>a</sup>  | 93.23  | 77 | B4-2  |
|     |                                                                                                                                                       |                           | 166 | 128 <sup>a</sup> | 109.82 | 78 | B4-3  |
| B5  | Boc-Ile-OH<br><br>                                                 | (1)DCC/NHS<br>/TEA (2)TFA | 71  | 67 <sup>a</sup>  | 100.35 | 79 | B5-1  |
|     |                                                                                                                                                       |                           | 83  | 83 <sup>a</sup>  | 90.09  | 80 | B5-2  |
|     |                                                                                                                                                       |                           | 166 | 118 <sup>a</sup> | 95.77  | 81 | B5-3  |
| B6  | Boc-Pro-OH<br><br>                                                 | (1)DCC/NHS<br>/TEA (2)TFA | 83  | 41 <sup>a</sup>  | 95.24  | 82 | B6-1  |
|     |                                                                                                                                                       |                           | 102 | 82 <sup>a</sup>  | 107.89 | 83 | B6-2  |
|     |                                                                                                                                                       |                           | 166 | 98 <sup>a</sup>  | 105.99 | 84 | B6-3  |
| B7  | Boc-Met-OH<br><br>                                                 | (1)DCC/NHS<br>/TEA (2)TFA | 83  | 68 <sup>a</sup>  | 105.45 | 85 | B7-1  |
|     |                                                                                                                                                       |                           | 166 | 111 <sup>a</sup> | 98.38  | 86 | B7-2  |
| B8  | Boc-Phe-OH<br><br>                                                 | (1)DCC/NHS<br>/TEA (2)TFA | 83  | 71 <sup>a</sup>  | 92.99  | 87 | B8-1  |
|     |                                                                                                                                                       |                           | 166 | 99 <sup>a</sup>  | 54.3   | 88 | B8-2  |

|     |                                                                                     |                                                       |                  |                  |        |                 |       |
|-----|-------------------------------------------------------------------------------------|-------------------------------------------------------|------------------|------------------|--------|-----------------|-------|
| B9  | Boc-Trp(Boc)-OH                                                                     | (1)DCC/NHS<br>/TEA (2)TFA                             | 83               | 55 <sup>a</sup>  | 77.63  | 89              | B9-1  |
|     | 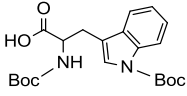   |                                                       | 166              | 89 <sup>a</sup>  | 39.69  | 90              | B9-2  |
|     | 256                                                                                 |                                                       | 107 <sup>a</sup> | 43.30            | 91     | B9-3            |       |
| B10 | 5-Fluorotryptophan                                                                  | DCC/NHS/T<br>EA                                       | 83               | 3 <sup>a</sup>   | 88.76  | 92              | B10-1 |
|     |    |                                                       | 166              | 23 <sup>a</sup>  | 93.34  | 93 <sup>d</sup> | B10-2 |
| B11 | Boc-Tyr(tBu)-OH                                                                     | (1)DCC/NHS<br>/TEA (2)TFA                             | 83               | 68 <sup>a</sup>  | 92.75  | 94              | B11-1 |
|     |    |                                                       | 166              | 98 <sup>a</sup>  | 78.38  | 95              | B11-2 |
| B12 | Boc-Ser(tBu)-OH                                                                     | (1)DCC/NHS<br>/TEA (2)TFA                             | 83               | 74 <sup>a</sup>  | 101.44 | 96              | B12-1 |
|     |    |                                                       | 166              | 113 <sup>a</sup> | 105.55 | 97              | B12-2 |
| B13 | Boc-Thr(tBu)-OH                                                                     | (1)DCC/NHS<br>/TEA (2)TFA                             | 71               | 75 <sup>a</sup>  | 104.71 | 98              | B13-1 |
|     |  |                                                       | 83               | 88 <sup>a</sup>  | 92.34  | 99              | B13-2 |
|     | 166                                                                                 |                                                       | 126 <sup>a</sup> | 103.05           | 100    | B13-3           |       |
| B14 | Boc-Cys(Acm)-OH                                                                     | (1)DCC/NHS<br>/TEA<br>(2)I <sub>2</sub> /Methano<br>1 | 83               | N/A              | /      | /               | /     |
|     |  |                                                       | 166              | N/A              | /      | /               | /     |
| B15 | Boc-Asn(Trt)-OH                                                                     | (1)DCC/NHS<br>/TEA (2)TFA                             | 166              | 75 <sup>a</sup>  | 90.97  | 101             | B15-1 |
|     |  |                                                       | 512              | 88 <sup>a</sup>  | 101.71 | 102             | B15-2 |
| B16 | Boc-Gln(Trt)-OH                                                                     | (1)DCC/NHS<br>/TEA (2)TFA                             | 166              | 71 <sup>a</sup>  | 106.72 | 103             | B16-1 |
|     |  |                                                       | 256              | 86 <sup>a</sup>  | 109.94 | 104             | B16-2 |
| B17 | Boc-His(Trt)-OH                                                                     | (1)DCC/NHS<br>/TEA (2)TFA                             | 83               | 65 <sup>a</sup>  | 104.12 | 105             | B17-1 |
|     |  |                                                       | 166              | 113 <sup>a</sup> | 108.68 | 106             | B17-2 |
| B18 | Boc-Lys-OH                                                                          | (1)DCC/NHS<br>/TEA (2)TFA                             | 83               | 67 <sup>a</sup>  | 94.96  | 107             | B18-1 |
|     |  |                                                       | 166              | 130 <sup>a</sup> | 93.83  | 108             | B18-2 |

|     |                                                                                                                                  |                           |                  |                  |                  |       |       |
|-----|----------------------------------------------------------------------------------------------------------------------------------|---------------------------|------------------|------------------|------------------|-------|-------|
| B19 | Boc-Arg(Pbf)-OH<br>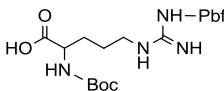                             | (1)DCC/NHS<br>/TEA (2)TFA | 45               | 33 <sup>a</sup>  | 100.09           | 109   | B19-1 |
|     | 83                                                                                                                               |                           | 64 <sup>a</sup>  | 100.16           | 110              | B19-2 |       |
|     | 166                                                                                                                              |                           | 110 <sup>a</sup> | 43.73            | 111              | B19-3 |       |
| B20 | Boc-Asp(otBu)-OH<br>                            | (1)DCC/NHS<br>/TEA (2)TFA | 83               | 54 <sup>a</sup>  | 105.61           | 112   | B20-1 |
|     | 166                                                                                                                              |                           | 98 <sup>a</sup>  | 85.96            | 113              | B20-2 |       |
| B21 | Boc-Glu(otBu)-OH<br>                            | (1)DCC/NHS<br>/TEA (2)TFA | 71               | 48 <sup>a</sup>  | 97.36            | 114   | B21-1 |
|     | 134                                                                                                                              |                           | 81 <sup>a</sup>  | 91.94            | 115              | B21-2 |       |
| B22 | Boc-Lys(Ac)-OH<br>                              | (1)DCC/NHS<br>/TEA (2)TFA | 192              | 124 <sup>a</sup> | 100.52           | 116   | B22-1 |
| B23 | Ac-Lys(Boc)-OH<br>                             | (1)DCC/NHS<br>/TEA (2)TFA | 96               | 84 <sup>a</sup>  | 98.03            | 117   | B23-1 |
|     | 192                                                                                                                              |                           | 121 <sup>a</sup> | 100.53           | 118              | B23-2 |       |
| C1  | Nicotinic acid<br>                            | DCC/NHS/T<br>EA           | 32               | 22 <sup>a</sup>  | 99.89            | 119   | C1-1  |
|     | 64                                                                                                                               |                           | 50 <sup>a</sup>  | 104.06           | 120 <sup>d</sup> | C1-2  |       |
| C2  | 2-(Chloromethyl)pyridine<br>hydrochloride<br> | 50% Ethanol<br>80°C       | 64               | 16 <sup>a</sup>  | 94.46            | 121   | C2-1  |
|     | 96                                                                                                                               |                           | 30 <sup>a</sup>  | 100.27           | 122              | C2-2  |       |
|     | 128                                                                                                                              |                           | 51 <sup>a</sup>  | 104.17           | 123              | C2-3  |       |
| C3  | 4-(Chloromethyl)pyridine<br>hydrochloride<br> | 50% Ethanol<br>80°C       | 64               | 22 <sup>a</sup>  | 91.06            | 124   | C3-1  |
|     | 96                                                                                                                               |                           | 24 <sup>a</sup>  | 90.69            | 125              | C3-2  |       |
|     | 128                                                                                                                              |                           | 26 <sup>a</sup>  | 102.54           | 126              | C3-3  |       |
| C4  | Coumalic acid<br>                             | DCC/NHS/T<br>EA           | 32               | NA               | /                |       |       |
|     | 64                                                                                                                               |                           | NA               | /                |                  |       |       |
| C5  | 3-Fluoro-4-pyridinecarboxylic acid<br>        | DCC/NHS/T<br>EA           | 32               | 11 <sup>a</sup>  | 100.98           | 127   | C5-1  |

|     |                                                                                                                                |                     |     |                 |        |                  |                   |
|-----|--------------------------------------------------------------------------------------------------------------------------------|---------------------|-----|-----------------|--------|------------------|-------------------|
|     |                                               |                     | 64  | 27 <sup>a</sup> | 100.44 | 128              | C5-2              |
|     |                                                                                                                                |                     | 96  | 34 <sup>a</sup> | 96.09  | 129              | C5-3              |
|     |                                                                                                                                |                     | 128 | 40 <sup>a</sup> | 110.60 | 130              | C5-4 <sup>d</sup> |
| C6  | Trigonelline hydrochloride<br>                | EDC/NHS             | 64  | NA              | /      |                  |                   |
| C7  | 2,3,5-Trifluoropyridine-4-carboxylic acid<br> | DCC/NHS/T           | 32  | 4 <sup>a</sup>  | 91.22  | 131              | C7-1              |
|     |                                                                                                                                | EA                  | 64  | 7 <sup>a</sup>  | 103.45 | 132              | C7-2              |
| C8  | 2-Bromopyrimidine<br>                       | 50% Ethanol<br>80°C | 32  | 16 <sup>a</sup> | 101.76 | 133              | C8-1              |
|     |                                                                                                                                |                     | 64  | 33 <sup>a</sup> | 102.63 | 134              | C8-2              |
|     |                                                                                                                                |                     | 128 | 46 <sup>a</sup> | 102.74 | 135              | C8-3              |
| C9  | 2-Chloro-4,6-diamino-1,3,5-triazine<br>     | 50% Ethanol<br>80°C | 32  | 29 <sup>a</sup> | 92.97  | 136              | C9-1              |
|     |                                                                                                                                |                     | 51  | 46 <sup>a</sup> | 94.86  | 137              | C9-2              |
|     |                                                                                                                                |                     | 64  | 55 <sup>a</sup> | 93.23  | 138              | C9-3              |
|     |                                                                                                                                |                     | 77  | 60 <sup>a</sup> | 101.02 | 139              | C9-4              |
|     |                                                                                                                                |                     | 96  | 78 <sup>a</sup> | 94.37  | 140 <sup>d</sup> | C9-5              |
| C10 | 2-Chloro-4,6-dimethoxy-1,3,5-triazine<br>   | 50% Ethanol<br>80°C | 32  | 25 <sup>a</sup> | 99.39  | 141              | C10-1             |
|     |                                                                                                                                |                     | 64  | 55 <sup>a</sup> | 96.50  | 142              | C10-2             |
| C11 | 6-Chloropurine<br>                          | 50% Ethanol<br>80°C | 32  | 15 <sup>a</sup> | 100.86 | 143              | C11-1             |
|     |                                                                                                                                |                     | 64  | 27 <sup>a</sup> | 100.51 | 144              | C11-2             |
|     |                                                                                                                                |                     | 128 | 48 <sup>a</sup> | 98.04  | 145              | C11-3             |

|     |                                                                                                                          |                     |     |                  |        |                  |       |
|-----|--------------------------------------------------------------------------------------------------------------------------|---------------------|-----|------------------|--------|------------------|-------|
| C12 | 2-Amino-6-chloropurine<br>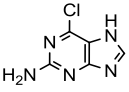              | 50% Ethanol<br>80°C | 32  | 14 <sup>a</sup>  | 90.21  | 146              | C12-1 |
|     |                                                                                                                          |                     | 64  | 26 <sup>a</sup>  | 110.11 | 147              | C12-2 |
|     |                                                                                                                          |                     | 128 | 32 <sup>a</sup>  | 102.49 | 148              | C12-3 |
| C13 | 2-Thiophenecarboxylic acid<br>          | DCC/NHS/T<br>EA     | 32  | 16 <sup>a</sup>  | 86.90  | 149              | C13-1 |
|     |                                                                                                                          |                     | 64  | 47 <sup>a</sup>  | 92.97  | 150 <sup>d</sup> | C13-2 |
| C14 | 2-Furoic acid<br>                       | DCC/NHS/T<br>EA     | 32  | 14 <sup>a</sup>  | 90.52  | 151              | C14-1 |
|     |                                                                                                                          |                     | 64  | 37 <sup>a</sup>  | 104.12 | 152 <sup>d</sup> | C14-2 |
| C15 | Pyrrole-2-carboxylic acid<br>           | DCC/NHS/T<br>EA     | 32  | 11 <sup>a</sup>  | 88.65  | 153              | C15-1 |
|     |                                                                                                                          |                     | 64  | 31 <sup>a</sup>  | 93.03  | 154              | C15-2 |
| C16 | 3-Quinolinecarboxylic acid<br>         | DCC/NHS/T<br>EA     | 32  | 5 <sup>a</sup>   | 97.87  | 155              | C16-1 |
|     |                                                                                                                          |                     | 64  | 49 <sup>a</sup>  | 88.63  | 156 <sup>d</sup> | C16-2 |
| C17 | 6-(1H-Pyrazol-1-yl)nicotinic acid<br> | DCC/NHS/T<br>EA     | 32  | 24 <sup>a</sup>  | 93.12  | 157 <sup>d</sup> | C17-1 |
|     |                                                                                                                          |                     | 64  | 40 <sup>a</sup>  | 84.37  | 158 <sup>d</sup> | C17-2 |
| C18 | 3-Indoleacetic acid<br>               | DCC/NHS/T<br>EA     | 32  | 22 <sup>a</sup>  | 92.77  | 159              | C18-1 |
|     |                                                                                                                          |                     | 64  | 42 <sup>a</sup>  | 96.42  | 160 <sup>d</sup> | C18-2 |
|     |                                                                                                                          |                     | 142 | 94 <sup>a</sup>  | 104.56 | 161 <sup>d</sup> | C18-3 |
|     |                                                                                                                          |                     | 160 | 100 <sup>a</sup> | 104.92 | 162 <sup>d</sup> | C18-4 |
|     |                                                                                                                          |                     | 172 | 106 <sup>a</sup> | 97.00  | 163 <sup>d</sup> | C18-5 |
| C19 | 4-Imidazoleacrylic acid<br>           | DCC/NHS/T<br>EA     | 32  | 8 <sup>a</sup>   | 87.31  | 164              | C19-1 |
|     |                                                                                                                          |                     | 64  | 46 <sup>a</sup>  | 103.09 | 165 <sup>d</sup> | C19-2 |
| C20 | 2-Benzimidazolepropionic acid<br>     | DCC/NHS/T<br>EA     | 32  | 21 <sup>a</sup>  | 95.07  | 166              | C20-1 |

|     |                                                                                                                                             |                 |     |                  |        |                  |       |
|-----|---------------------------------------------------------------------------------------------------------------------------------------------|-----------------|-----|------------------|--------|------------------|-------|
|     | 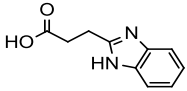                                                           |                 | 64  | 50 <sup>a</sup>  | 103.01 | 167 <sup>d</sup> | C20-2 |
| C21 | Fmoc-L-1,2,3,4-Tetrahydroisquinoline-3-carboxylic acid<br> | DCC/NHS/T<br>EA | 32  | 19 <sup>a</sup>  | 87.06  | 168 <sup>d</sup> | C21-1 |
|     |                                                                                                                                             | DCC/NHS/T<br>EA | 64  | 40 <sup>a</sup>  | 94.06  | 169 <sup>d</sup> | C21-2 |
| D1  | Benzoic acid<br>                                           | DCC/NHS/T<br>EA | 19  | 7 <sup>a</sup>   | 84.13  | 170              | D1-1  |
|     |                                                                                                                                             | DCC/NHS/T<br>EA | 38  | 19 <sup>a</sup>  | 93.31  | 171              | D1-2  |
|     |                                                                                                                                             | DCC/NHS/T<br>EA | 48  | 27 <sup>a</sup>  | 102.10 | 172              | D1-3  |
|     |                                                                                                                                             | DCC/NHS/T<br>EA | 58  | 46 <sup>a</sup>  | 103.69 | 173 <sup>d</sup> | D1-4  |
|     |                                                                                                                                             | DCC/NHS/T<br>EA | 64  | 60 <sup>a</sup>  | 97.56  | 174 <sup>d</sup> | D1-5  |
|     |                                                                                                                                             | DCC/NHS/T<br>EA | 70  | 67 <sup>a</sup>  | 102.10 | 175 <sup>d</sup> | D1-6  |
|     |                                                                                                                                             | DCC/NHS/T<br>EA | 82  | 77 <sup>a</sup>  | 98.10  | 176 <sup>d</sup> | D1-7  |
|     |                                                                                                                                             | DCC/NHS/T<br>EA | 96  | 85 <sup>a</sup>  | 84.99  | 177 <sup>d</sup> | D1-8  |
|     |                                                                                                                                             | DCC/NHS/T<br>EA | 128 | 99 <sup>a</sup>  | 106.61 | 178 <sup>d</sup> | D1-9  |
| D2  | p-Toluic acid<br>                                        | DCC/NHS/T<br>EA | 61  | 24 <sup>a</sup>  | 101.42 | 179              | D2-1  |
|     |                                                                                                                                             | DCC/NHS/T<br>EA | 76  | 42 <sup>a</sup>  | 92.01  | 180 <sup>d</sup> | D2-2  |
|     |                                                                                                                                             | DCC/NHS/T<br>EA | 96  | 59 <sup>a</sup>  | 91.60  | 181 <sup>d</sup> | D2-3  |
|     |                                                                                                                                             | DCC/NHS/T<br>EA | 102 | 62 <sup>a</sup>  | 87.65  | 182 <sup>d</sup> | D2-4  |
|     |                                                                                                                                             | DCC/NHS/T<br>EA | 128 | 103 <sup>a</sup> | 103.85 | 183 <sup>d</sup> | D2-5  |
| D3  | 4-Isopropylbenzoic acid<br>                              | DCC/NHS/T<br>EA | 32  | 15 <sup>a</sup>  | 102.09 | 184              | D3-1  |
|     |                                                                                                                                             | DCC/NHS/T<br>EA | 76  | 45 <sup>a</sup>  | 56.14  | 185 <sup>d</sup> | D3-2  |
|     |                                                                                                                                             | DCC/NHS/T<br>EA | 86  | 56 <sup>a</sup>  | 59.77  | 186 <sup>d</sup> | D3-3  |

|     |                                                                                                                     |                 |     |                  |        |                  |       |
|-----|---------------------------------------------------------------------------------------------------------------------|-----------------|-----|------------------|--------|------------------|-------|
| D4  | 4-Vinylbenzoic acid<br>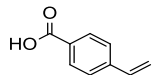            | DCC/NHS/T<br>EA | 32  | 16 <sup>a</sup>  | 102.51 | 187              | D4-1  |
|     |                                                                                                                     | DCC/NHS/T<br>EA | 64  | 53 <sup>a</sup>  | 77.59  | 188 <sup>d</sup> | D4-2  |
| D5  | 4-tert-Butylbenzoic acid<br>       | DCC/NHS/T<br>EA | 32  | 17 <sup>a</sup>  | 97.19  | 189              | D5-1  |
|     |                                                                                                                     | DCC/NHS/T<br>EA | 50  | 37 <sup>a</sup>  | 47.43  | 190 <sup>d</sup> | D5-2  |
|     |                                                                                                                     | DCC/NHS/T<br>EA | 64  | 59 <sup>a</sup>  | 48.63  | 191 <sup>d</sup> | D5-3  |
| D6  | 4-Phenylbutyric acid<br>           | DCC/NHS/T<br>EA | 64  | 51 <sup>a</sup>  | 75.5   | 192 <sup>d</sup> | D6-1  |
|     |                                                                                                                     | DCC/NHS/T<br>EA | 128 | 105 <sup>a</sup> | 101.08 | 193 <sup>d</sup> | D6-2  |
| D7  | Biphenyl-4-carboxylic acid<br>    | DCC/NHS/T<br>EA | 13  | 3 <sup>a</sup>   | 97.85  | 194              | D7-1  |
|     |                                                                                                                     | DCC/NHS/T<br>EA | 26  | 10 <sup>a</sup>  | 92.76  | 195              | D7-2  |
|     |                                                                                                                     | DCC/NHS/T<br>EA | 64  | 29 <sup>a</sup>  | 96.46  | 196              | D7-3  |
|     |                                                                                                                     | DCC/NHS/T<br>EA | 96  | 57 <sup>a</sup>  | 96.30  | 197 <sup>d</sup> | D7-4  |
| D8  | 1-naphthoic acid<br>             | DCC/NHS/T<br>EA | 32  | 26 <sup>a</sup>  | 91.49  | 198              | D8-1  |
|     |                                                                                                                     | DCC/NHS/T<br>EA | 64  | 40 <sup>a</sup>  | 96.48  | 199              | D8-2  |
| D9  | 9-Anthroic acid<br>              | DCC/NHS/T<br>EA | 32  | NA               | /      | /                | /     |
|     |                                                                                                                     | DCC/NHS/T<br>EA | 64  | NA               | /      | /                | /     |
| D10 | 4-(4-Pyridyl)benzoic acid<br>    | DCC/NHS/T<br>EA | 32  | 9 <sup>a</sup>   | 91.71  | 200              | D10-1 |
| D11 | Boc-4-Abz-OH<br>                 | DCC/NHS/T<br>EA | 32  | 14 <sup>a</sup>  | 101.05 | 201              | D11-1 |
|     |                                                                                                                     | DCC/NHS/T<br>EA | 64  | 44 <sup>a</sup>  | 103.70 | 202              | D11-2 |
| D12 | Boc-4-aminophenylacetic acid<br> | DCC/NHS/T<br>EA | 26  | 8 <sup>a</sup>   | 91.11  | 203              | D12-1 |

|     |                                                                                                                         |                 |     |                  |        |                  |       |
|-----|-------------------------------------------------------------------------------------------------------------------------|-----------------|-----|------------------|--------|------------------|-------|
|     | 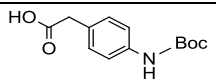                                       | DCC/NHS/T<br>EA | 51  | 22 <sup>a</sup>  | 102.41 | 204              | D12-2 |
| D13 | Boc-3-Abz-OH<br>                       | DCC/NHS/T<br>EA | 26  | 7 <sup>a</sup>   | 94.65  | 205              | D13-1 |
|     |                                                                                                                         | DCC/NHS/T<br>EA | 51  | 18 <sup>a</sup>  | 103.81 | 206              | D13-2 |
|     |                                                                                                                         | DCC/NHS/T<br>EA | 64  | 34 <sup>a</sup>  | 98.30  | 207              | D13-3 |
|     |                                                                                                                         | DCC/NHS/T<br>EA | 128 | NA               | /      | /                | /     |
| D14 | 4-(Boc-aminomethyl)benzoic acid<br>    | DCC/NHS/T<br>EA | 26  | 8 <sup>a</sup>   | 99.71  | 208              | D14-1 |
|     |                                                                                                                         | DCC/NHS/T<br>EA | 51  | 21 <sup>a</sup>  | 104.10 | 209              | D14-2 |
|     |                                                                                                                         | DCC/NHS/T<br>EA | 64  | 40 <sup>a</sup>  | 92.80  | 210              | D14-3 |
|     |                                                                                                                         | DCC/NHS/T<br>EA | 128 | 103 <sup>a</sup> | 62.33  | 211              | D14-4 |
| D15 | 4-Hydrazinobenzoic acid<br>           | DCC/NHS/T<br>EA | 32  | 7 <sup>a</sup>   | 108.63 | 212              | D15-1 |
|     |                                                                                                                         | DCC/NHS/T<br>EA | 64  | NA               | /      | /                | /     |
| D16 | 4-(1H-Imidazol-1-yl)benzoic acid<br> | DCC/NHS/T<br>EA | 32  | 11 <sup>a</sup>  | 105.21 | 213              | D16-1 |
|     |                                                                                                                         | DCC/NHS/T<br>EA | 64  | 38 <sup>a</sup>  | 113.73 | 214 <sup>d</sup> | D16-2 |
|     |                                                                                                                         | DCC/NHS/T<br>EA | 96  | 66 <sup>a</sup>  | 93.10  | 215 <sup>d</sup> | D16-3 |
| D17 | 5-Benzimidazolecarboxylic acid<br>   | DCC/NHS/T<br>EA | 32  | 21 <sup>a</sup>  | 94.47  | 216 <sup>d</sup> | D17-1 |
|     |                                                                                                                         | DCC/NHS/T<br>EA | 64  | 52 <sup>a</sup>  | 107.11 | 217 <sup>d</sup> | D17-2 |
| D18 | Di-Fmoc-3,5-diaminobenzoic acid<br>  | DCC/NHS/T<br>EA | 26  | 5 <sup>a</sup>   | 86.12  | 218              | D18-1 |
|     |                                                                                                                         | DCC/NHS/T<br>EA | 51  | 17 <sup>a</sup>  | 97.94  | 219              | D18-2 |
|     |                                                                                                                         | DCC/NHS/T<br>EA | 64  | 26 <sup>a</sup>  | 95.62  | 220              | D18-3 |
| D19 | 3-fluorobenzoic acid<br>             | DCC/NHS/T<br>EA | 26  | 27 <sup>a</sup>  | 97.21  | 221              | D19-1 |
|     |                                                                                                                         | DCC/NHS/T<br>EA | 64  | 30 <sup>a</sup>  | 93.11  | 222              | D19-2 |



|     |                                                                                                                                 |                 |     |                  |        |                  |       |
|-----|---------------------------------------------------------------------------------------------------------------------------------|-----------------|-----|------------------|--------|------------------|-------|
| D20 | 3,5-Difluorobenzoic acid<br>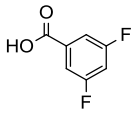                   | DCC/NHS/T<br>EA | 32  | 25 <sup>a</sup>  | 100.35 | 223              | D20-1 |
|     |                                                                                                                                 | DCC/NHS/T<br>EA | 64  | 59 <sup>a</sup>  | 94.47  | 224 <sup>d</sup> | D20-2 |
| D21 | 2,3,4-Trifluorobenzoic acid<br>                | DCC/NHS/T<br>EA | 16  | 6 <sup>a</sup>   | 83.16  | 225              | D21-1 |
|     |                                                                                                                                 | DCC/NHS/T<br>EA | 32  | 14 <sup>a</sup>  | 91.22  | 226              | D21-2 |
|     |                                                                                                                                 | DCC/NHS/T<br>EA | 64  | 28 <sup>a</sup>  | 100.51 | 227              | D21-3 |
|     |                                                                                                                                 | DCC/NHS/T<br>EA | 96  | 34 <sup>a</sup>  | 96.54  | 228              | D21-4 |
|     |                                                                                                                                 | DCC/NHS/T<br>EA | 256 | 107 <sup>a</sup> | 104.14 | 229 <sup>d</sup> | D21-5 |
| D22 | 2,3,4-Trifluorobenzaldehyde<br>                | DMSO            | 32  | 2 <sup>a</sup>   | 79.31  | 230              | D22-1 |
|     |                                                                                                                                 | DMSO            | 64  | 4 <sup>a</sup>   | 84.48  | 231              | D22-2 |
| D23 | 2,3,5,6-Tetrafluoro-p-toluic acid<br>        | DCC/NHS/T<br>EA | 16  | 13 <sup>a</sup>  | 83.36  | 232              | D23-1 |
|     |                                                                                                                                 | DCC/NHS/T<br>EA | 24  | 19 <sup>a</sup>  | 89.73  | 233              | D23-2 |
|     |                                                                                                                                 | DCC/NHS/T<br>EA | 32  | 25 <sup>a</sup>  | 91.09  | 234              | D23-3 |
|     |                                                                                                                                 | DCC/NHS/T<br>EA | 64  | 44 <sup>a</sup>  | 37.72  | 235 <sup>d</sup> | D23-4 |
| D24 | 2,3,4,5,6-Pentafluorobenzoic acid<br>        | DCC/NHS/T<br>EA | 8   | NA               | /      | /                | /     |
|     |                                                                                                                                 | DCC/NHS/T<br>EA | 17  | NA               | /      | /                | /     |
|     |                                                                                                                                 | DCC/NHS/T<br>EA | 24  | NA               | /      | /                | /     |
| D25 | 4-(Trifluoromethyl)benzoic acid<br>          | DCC/NHS/T<br>EA | 32  | 18 <sup>a</sup>  | 106.17 | 236              | D25-1 |
| D26 | 4-(Trifluoromethyl)phenyl isothiocyanate<br> | DMSO            | 32  | 31 <sup>a</sup>  | 81.85  | 237              | D26-1 |
|     |                                                                                                                                 | DMSO            | 64  | 63 <sup>a</sup>  | 71.88  | 238 <sup>d</sup> | D26-2 |
| D27 | 3,5-Bis(trifluoromethyl)benzaldehyde                                                                                            | DMSO            | 32  | 27 <sup>b</sup>  | 88.15  | 239              | D27-1 |

|     |                                                                                                                        |                 |     |                  |        |                  |       |
|-----|------------------------------------------------------------------------------------------------------------------------|-----------------|-----|------------------|--------|------------------|-------|
|     | 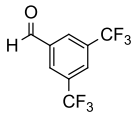                                      | DMSO            | 64  | 43 <sup>b</sup>  | 95.32  | 240              | D27-2 |
| D28 | 4-(Trifluoromethoxy)benzoic acid<br>  | DCC/NHS/T<br>EA | 32  | 17 <sup>a</sup>  | 105.37 | 241              | D28-1 |
|     |                                                                                                                        | DCC/NHS/T<br>EA | 64  | 47 <sup>a</sup>  | 69.21  | 242 <sup>d</sup> | D28-2 |
| D29 | 3,4,5-Trimethoxyphenyl isocyanate<br> | DMSO/TEA        | 64  | NA               | /      | /                | /     |
| D30 | 4-Chlorobenzoic acid<br>              | DCC/NHS/T<br>EA | 32  | 12 <sup>a</sup>  | 96.44  | 243 <sup>d</sup> | D30-1 |
|     |                                                                                                                        | DCC/NHS/T<br>EA | 64  | 32 <sup>a</sup>  | 90.85  | 244 <sup>d</sup> | D30-2 |
| D31 | 2,4,6-Trichlorobenzoic acid<br>      | DCC/NHS/T<br>EA | 32  | 9 <sup>a</sup>   | 107.55 | 245              | D31-1 |
|     |                                                                                                                        | DCC/NHS/T<br>EA | 64  | 18 <sup>a</sup>  | 103.70 | 246 <sup>d</sup> | D31-2 |
| D32 | 4-Bromobenzoic acid<br>             | DCC/NHS/T<br>EA | 32  | 11 <sup>a</sup>  | 91.10  | 247              | D32-1 |
|     |                                                                                                                        | DCC/NHS/T<br>EA | 64  | 44 <sup>a</sup>  | 43.61  | 248 <sup>d</sup> | D32-2 |
| D33 | 4-Bromophenyl isocyanate<br>        | DMSO            | 32  | 32 <sup>a</sup>  | 87.44  | 249 <sup>d</sup> | D33-1 |
| D34 | 4-Bromobenzaldehyde<br>             | DMSO            | 32  | NA               | /      | /                | /     |
|     |                                                                                                                        | DMSO            | 64  | 21 <sup>a</sup>  | 87.71  | 250 <sup>d</sup> | D34-1 |
| D35 | 2-Bromobenzoic acid<br>             | DCC/NHS/T<br>EA | 32  | 14 <sup>a</sup>  | 93.28  | 251 <sup>d</sup> | D35-1 |
|     |                                                                                                                        | DCC/NHS/T<br>EA | 64  | 41 <sup>a</sup>  | 72.72  | 252 <sup>d</sup> | D35-2 |
|     |                                                                                                                        | DCC/NHS/T<br>EA | 96  | 53 <sup>a</sup>  | 83.03  | 253 <sup>d</sup> | D35-3 |
|     |                                                                                                                        | DCC/NHS/T<br>EA | 128 | 119 <sup>a</sup> | 103.74 | 254 <sup>d</sup> | D35-4 |
| D36 | 4-Iodobenzoic acid                                                                                                     | DCC/NHS/T<br>EA | 32  | 16 <sup>a</sup>  | 102.55 | 255              | D36-1 |

|     |                                                                                                                       |                 |     |                  |        |                  |                    |
|-----|-----------------------------------------------------------------------------------------------------------------------|-----------------|-----|------------------|--------|------------------|--------------------|
|     | 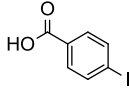                                     | DCC/NHS/T<br>EA | 64  | 46 <sup>a</sup>  | 73.62  | 256 <sup>d</sup> | D36-2              |
|     |                                                                                                                       | DCC/NHS/T<br>EA | 96  | 75 <sup>a</sup>  | 75.18  | 257 <sup>d</sup> | D36-3              |
|     |                                                                                                                       | DCC/NHS/T<br>EA | 128 | 121 <sup>a</sup> | 108.01 | 258 <sup>d</sup> | D36-4              |
| D37 | 2-Iodobenzoic acid<br>               | DCC/NHS/T<br>EA | 32  | NA               | /      | /                | /                  |
|     |                                                                                                                       | DCC/NHS/T<br>EA | 64  | NA               | /      | /                | /                  |
| D38 | 2,3,5-Triiodobenzoic acid<br>        | DCC/NHS/T<br>EA | 32  | NA               | /      | /                | /                  |
|     |                                                                                                                       | DCC/NHS/T<br>EA | 64  | NA               | /      | /                | /                  |
| D39 | Diatrizoic acid<br>                  | DCC/NHS/T<br>EA | 32  | 29 <sup>b</sup>  | 98.91  | 259              | D39-1              |
|     |                                                                                                                       | DCC/NHS/T<br>EA | 64  | 34 <sup>b</sup>  | 94.98  | 260              | D39-2              |
| D40 | 4-Hydroxybenzoic acid<br>          | DCC/NHS/T<br>EA | 48  | 14 <sup>a</sup>  | 90.65  | 261 <sup>d</sup> | D40-1              |
|     |                                                                                                                       | DCC/NHS/T<br>EA | 64  | 25 <sup>a</sup>  | 96.03  | 262 <sup>d</sup> | D40-2              |
|     |                                                                                                                       | DCC/NHS/T<br>EA | 82  | 39 <sup>a</sup>  | 97.73  | 263 <sup>d</sup> | D40-3              |
| D41 | Salicylic acid<br>                 | DCC/NHS/T<br>EA | 32  | 16 <sup>a</sup>  | 103.19 | 264              | D41-1              |
|     |                                                                                                                       | DCC/NHS/T<br>EA | 64  | 42 <sup>a</sup>  | 102.27 | 265 <sup>d</sup> | D41-2              |
| D42 | 2,4-Dihydroxybenzoic acid<br>      | DCC/NHS/T<br>EA | 32  | 6 <sup>a</sup>   | 97.64  | 266              | D42-1              |
|     |                                                                                                                       | DCC/NHS/T<br>EA | 64  | 12 <sup>a</sup>  | 103.39 | 267              | D42-2              |
|     |                                                                                                                       | DCC/NHS/T<br>EA | 128 | 14 <sup>a</sup>  | 101.37 | 268              | D42-3 <sup>d</sup> |
| D43 | 3,4-Dihydroxyphenylacetic acid<br> | DCC/NHS/T<br>EA | 32  | 8 <sup>a</sup>   | 104.89 | 269              | D43-1              |
|     |                                                                                                                       | DCC/NHS/T<br>EA | 64  | 40 <sup>a</sup>  | 105.11 | 270 <sup>d</sup> | D43-2              |
| D44 | Gallic acid monohydrate<br>        | DCC/NHS/T<br>EA | 32  | NA               | /      | /                | /                  |
|     |                                                                                                                       | DCC/NHS/T<br>EA | 64  | NA               | /      | /                | /                  |

|     |                                                                                                                                 |                 |     |                 |        |                  |       |
|-----|---------------------------------------------------------------------------------------------------------------------------------|-----------------|-----|-----------------|--------|------------------|-------|
| D45 | 4-(Bromomethyl)phenylboronic acid<br>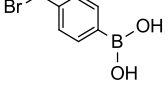          | DMSO<br>80°C    | 64  | 46 <sup>a</sup> | 59.38  | 271              | D45-1 |
|     |                                                                                                                                 | DMSO<br>80°C    | 96  | 56 <sup>a</sup> | 49.30  | 272              | D45-2 |
|     |                                                                                                                                 | DMSO<br>80°C    | 128 | 59 <sup>a</sup> | 17.74  | 273              | D45-3 |
| D46 | 4-Carboxybenzeneboronic acid pinacol ester<br> | DMSO<br>80°C    | 32  | NA              | /      | /                | /     |
|     |                                                                                                                                 | DMSO<br>80°C    | 64  | NA              | /      | /                | /     |
| D47 | 4-Methoxybenzoic acid<br>                      | DCC/NHS/T<br>EA | 32  | 14 <sup>a</sup> | 97.72  | 274              | D47-1 |
|     |                                                                                                                                 | DCC/NHS/T<br>EA | 64  | 50 <sup>a</sup> | 104.35 | 275 <sup>d</sup> | D47-2 |
| D48 | 4-Phenoxyphenyl isocyanate<br>                 | DMSO            | 32  | 35 <sup>a</sup> | 65.53  | 276 <sup>d</sup> | D48-1 |
| D49 | 4-Cyanobenzoic acid<br>                      | DCC/NHS/T<br>EA | 32  | 13 <sup>a</sup> | 101.84 | 277              | D49-1 |
|     |                                                                                                                                 | DCC/NHS/T<br>EA | 64  | 29 <sup>a</sup> | 100.85 | 278 <sup>d</sup> | D49-2 |
| D50 | 4-Fluoro-3-nitrobenzoic Acid<br>             | DCC/NHS/T<br>EA | 16  | NA              | /      | /                | /     |
|     |                                                                                                                                 | DCC/NHS/T<br>EA | 32  | NA              | /      | /                | /     |
|     |                                                                                                                                 | DCC/NHS/T<br>EA | 64  | NA              | /      | /                | /     |
| D51 | 4-Nitrobenzoic acid<br>                      | DCC/NHS/T<br>EA | 32  | 12 <sup>a</sup> | 98.46  | 279              | D51-1 |
| D52 | 4-Mercaptobenzoic acid<br>                   | DCC/NHS/T<br>EA | 32  | NA              | /      | /                | /     |
|     |                                                                                                                                 | DCC/NHS/T<br>EA | 64  | NA              | /      | /                | /     |
| D53 | 4-(Methylthio)phenyl isocyanate<br>          | DMSO/TEA        | 64  | NA              | /      | /                | /     |

|     |                                                                                                                                   |                        |     |                 |        |                  |       |
|-----|-----------------------------------------------------------------------------------------------------------------------------------|------------------------|-----|-----------------|--------|------------------|-------|
| D54 | 4-Sulfamylbenzoic acid<br>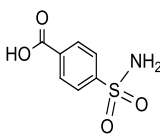                       | DCC/NHS/T<br>EA        | 32  | 14 <sup>a</sup> | 94.59  | 280              | D54-1 |
| D55 | Ferrocenecarboxylic acid<br>                     | DCC/NHS/T<br>EA        | 32  | NA              | /      | /                | /     |
|     |                                                                                                                                   | DCC/NHS/T<br>EA        | 64  | NA              | /      | /                | /     |
| E1  | 1-Amidinopyrazole<br>Hydrochloride<br>           | DIPEA/H <sub>2</sub> O | 66  | 42 <sup>b</sup> | 99.27  | 281              | E1-1  |
|     |                                                                                                                                   |                        | 110 | 60 <sup>b</sup> | 96.77  | 282              | E1-2  |
| E2  | Guanidineacetic acid<br>                       | DCC/NHS/T<br>EA        | 32  | 12 <sup>b</sup> | 85.88  | 283              | E2-1  |
|     |                                                                                                                                   |                        | 64  | 19 <sup>b</sup> | 100.42 | 284              | E2-2  |
|     |                                                                                                                                   |                        | 83  | 57 <sup>b</sup> | 95.88  | 285              | E2-3  |
|     |                                                                                                                                   |                        | 166 | 32 <sup>b</sup> | 64.02  | 286              | E2-4  |
| E3  | Cyclopentyl isocyanate<br>                     | DMSO                   | 32  | 29 <sup>a</sup> | 101.08 | 287              | E3-1  |
|     |                                                                                                                                   |                        | 64  | 60 <sup>a</sup> | 89.09  | 288              | E3-2  |
| E4  | Cycloheptyl isocyanate<br>                     | DMSO                   | 32  | 33 <sup>a</sup> | 91.93  | 289              | E4-1  |
|     |                                                                                                                                   |                        | 64  | 64 <sup>a</sup> | 64.31  | 290 <sup>d</sup> | E4-2  |
| E5  | Cyclododecyl isocyanate<br>                    | DMSO                   | 32  | 33 <sup>a</sup> | 33.97  | 291 <sup>d</sup> | E5-1  |
|     |                                                                                                                                   |                        | 48  | 48 <sup>a</sup> | 25.87  | 292 <sup>d</sup> | E5-2  |
| E6  | 3-bromopropylboronic acid<br>pinacol ester<br> | DMSO,<br>80°C          | 64  | 9 <sup>a</sup>  | 103.61 | 293              | E6-1  |
|     |                                                                                                                                   |                        | 128 | 20 <sup>a</sup> | 106.75 | 294              | E6-2  |
| E7  | 4-bromobutylboronic acid<br>                   | DMSO,<br>80°C          | 64  | 36 <sup>a</sup> | 97.90  | 295              | E7-1  |
|     |                                                                                                                                   |                        | 96  | 71 <sup>a</sup> | 85.96  | 296              | E7-2  |

|    |                                                                                                                                    |                 |     |                 |       |     |      |
|----|------------------------------------------------------------------------------------------------------------------------------------|-----------------|-----|-----------------|-------|-----|------|
|    |                                                                                                                                    |                 | 128 | 84 <sup>a</sup> | 91.74 | 297 | E7-3 |
| E8 | R-(+)-2-Pyrrolidone-5-carboxylic acid<br>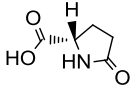         | DCC/NHS/T<br>EA | 32  | 16 <sup>a</sup> | 94.53 | 298 | E8-1 |
|    |                                                                                                                                    |                 | 64  | 28 <sup>a</sup> | 92.37 | 299 | E8-2 |
| E9 | (3-Carboxypropyl)triphenylphosphonium bromide<br> | DCC/NHS/T<br>EA | 90  | 35 <sup>a</sup> | 46.0  | 300 | E9-1 |
|    |                                                                                                                                    |                 | 180 | 99 <sup>a</sup> | 13.9  | 301 | E9-2 |

TEA is abbreviation of triethylamine; DCC is abbreviation of dicyclohex-ylcarbodiimide; NHS is abbreviation of N-hydroxysuccinimide; DMSO is abbreviation of dimethyl sulfoxide; TFA is abbreviation of trifluoroacetic acid; DIPEA is abbreviation of N, N-diisopropylethylamine.

Fed<sup>#</sup> is molar ratio of the chemical to G5 PAMAM dendrimer during the synthesis of surface-engineered dendrimers. In this manuscript, most of the surface-engineered dendrimers were synthesized at feeding molar ratios of 32 and 64. Amino acid-modified dendrimers were synthesized at feeding molar ratios of 83 and 166 according to a previous reference (*Biomaterials*, 2014, 35, 9187-9198). Depending on different conjugation efficacies of the reactions in Table S1, the feeding ratios were varied in a proper range. For example, if the conjugation efficacy is low, larger feeding ratios will be chosen, and if the conjugated product is insoluble in water or DMSO, lower feeding ratios will be chosen.

RLA\* is relative luciferase activity to untreated cells.

NO. means product number.

<sup>a</sup> means the products are characterized by <sup>1</sup>H NMR; <sup>b</sup> means the products are characterized by the ninhydrin assay and <sup>c</sup> means the products are characterized by fluorine element analysis (CAS Shanghai Institute of Organic Chemistry, China); <sup>d</sup> means the products are dissolved in DMSO; The solvent DMSO within the concentration range of 0-18.77 mM has no effect on luciferase gene silencing.

NA means the products are insoluble in water or DMSO.

**Table S2. Characterization of surface-engineered G5 PAMAM dendrimers in the second-generation library.**

| Ligand | Chemical                                                                                                                                   | Reaction condition     | Fed <sup>#</sup> | Conjugated      | RLA*  | Name              |
|--------|--------------------------------------------------------------------------------------------------------------------------------------------|------------------------|------------------|-----------------|-------|-------------------|
| S1     | Adamantyl isocyanate<br>                                  | DMSO                   | 32               | 33 <sup>a</sup> | 85.86 | S1-1              |
|        |                                                                                                                                            |                        | 64               | 63 <sup>a</sup> | 16.28 | S1-2 <sup>d</sup> |
| S2     | Glycidyl<br>2,2,3,3,4,4,5,5-octafluoropentyl<br>ether<br> | 50% Ethanol            | 64               | 22 <sup>a</sup> | 97.05 | S2-1              |
|        |                                                                                                                                            |                        | 96               | 41 <sup>a</sup> | 34.44 | S2-2              |
|        |                                                                                                                                            |                        | 128              | 71 <sup>a</sup> | 13.77 | S2-3 <sup>d</sup> |
|        |                                                                                                                                            |                        | 160              | 93 <sup>a</sup> | 34.57 | S2-4 <sup>d</sup> |
| S3     | 3,5-Dibromobenzoic acid<br>                             | DCC/NHS/TEA            | 64               | 46 <sup>b</sup> | 11.56 | S3-1 <sup>d</sup> |
| S4     | 3,5-Bis(trifluoromethyl)phenyl<br>isothiocyanate<br>    | DMSO                   | 32               | 26 <sup>a</sup> | 19.57 | S4-1 <sup>d</sup> |
|        |                                                                                                                                            |                        | 64               | 58 <sup>a</sup> | 87.97 | S4-2 <sup>d</sup> |
| S5     | Fmoc-L-4-Fluorophe<br>                                  | DCC/NHS/<br>Piperidine | 64               | 68 <sup>a</sup> | 39.35 | S5-1              |
| S6     | 2-Fluoro-3-(trifluoromethyl)benz<br>oic acid<br>        | DCC/NHS/TEA            | 32               | 17 <sup>a</sup> | 94.59 | S6-1 <sup>d</sup> |
|        |                                                                                                                                            |                        | 64               | 40 <sup>a</sup> | 56.07 | S6-2 <sup>d</sup> |
| S7     | 4-Hexylbenzoic acid<br>                                 | DCC/NHS/TEA            | 64               | 24 <sup>a</sup> | 68.83 | S7-1 <sup>d</sup> |
|        |                                                                                                                                            |                        | 82               | 64 <sup>a</sup> | 49.94 | S7-2 <sup>d</sup> |
|        |                                                                                                                                            |                        | 96               | 83 <sup>a</sup> | 69.84 | S7-3 <sup>d</sup> |

|    |                                                                                                          |             |    |                 |       |                   |
|----|----------------------------------------------------------------------------------------------------------|-------------|----|-----------------|-------|-------------------|
| S8 | 3-Bromobenzoic acid<br>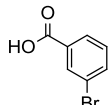 | DCC/NHS/TEA | 64 | 39 <sup>a</sup> | 98.95 | S8-1 <sup>d</sup> |
|    |                                                                                                          |             | 96 | 83 <sup>a</sup> | 59.65 | S8-2 <sup>d</sup> |

DMSO is abbreviation of dimethyl sulfoxide; DCC is abbreviation of dicyclohex-ylcarbodiimide; NHS is abbreviation of N-hydroxysuccinimide; TEA is abbreviation of Triethylamine.

Fed<sup>#</sup> is molar ratio of the chemical to G5 PAMAM dendrimer during the synthesis of surface-engineered dendrimers;

RLA\* is relative luciferase activity to untreated cells (normalized to relative luciferase light unit per mg protein, and relative to that of untreated cells);

<sup>a</sup> means the products are characterized by <sup>1</sup>H NMR; <sup>b</sup> means the products are characterized by the ninhydrin assay and <sup>c</sup> means the products are characterized by fluorine element analysis (CAS Shanghai Institute of Organic Chemistry, China); <sup>d</sup> means the products are dissolved in dimethyl sulphoxide. The solvent DMSO within the concentration range of 0-18.77 mM has no effect on luciferase gene silencing.



Appendix A.  $^1\text{H}$  NMR spectra of the surface-engineered dendrimers in the library.

### G5 PAMAM dendrimer

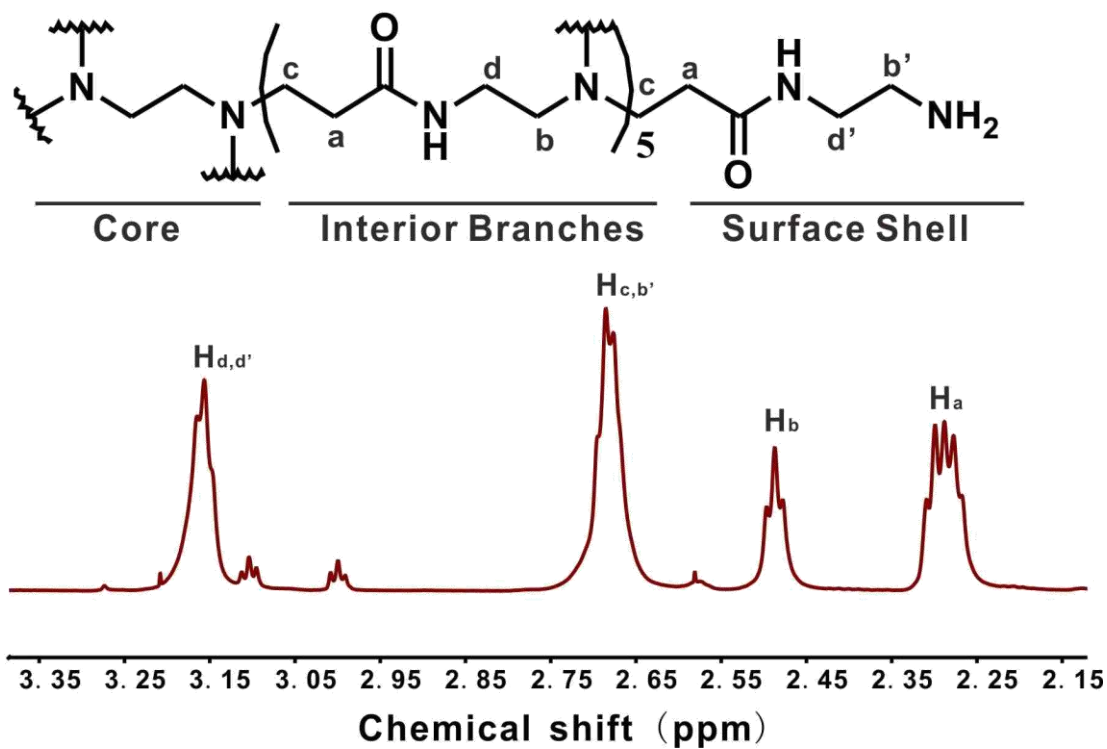

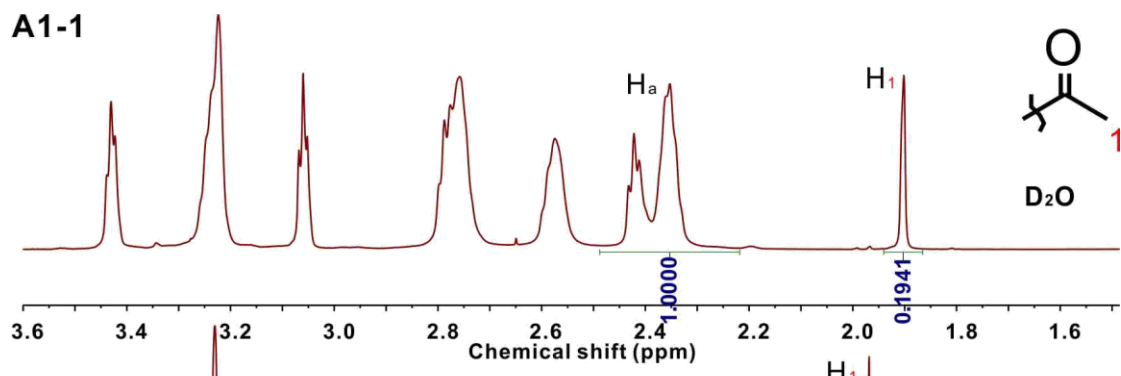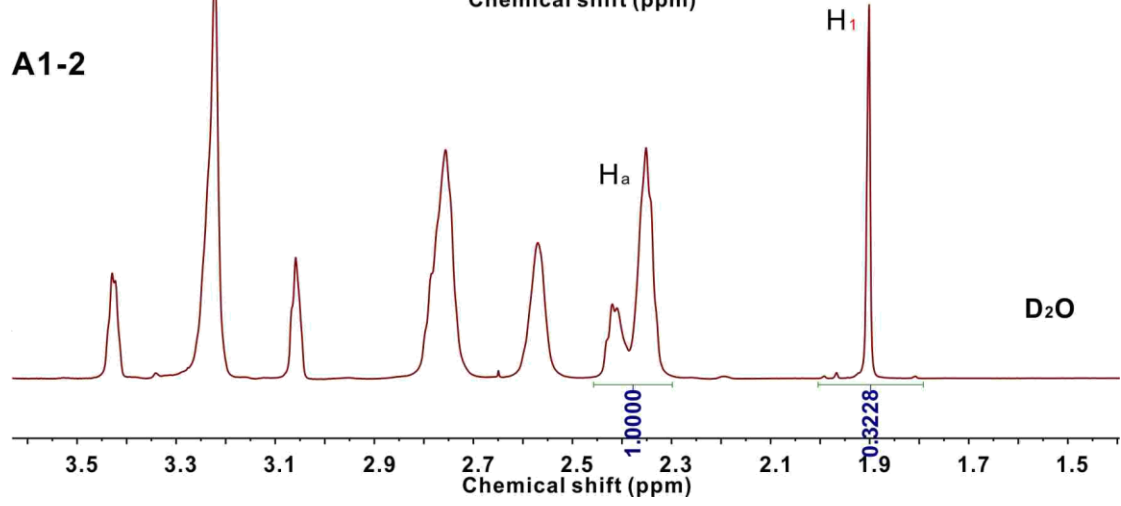

A2-1

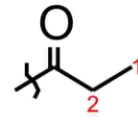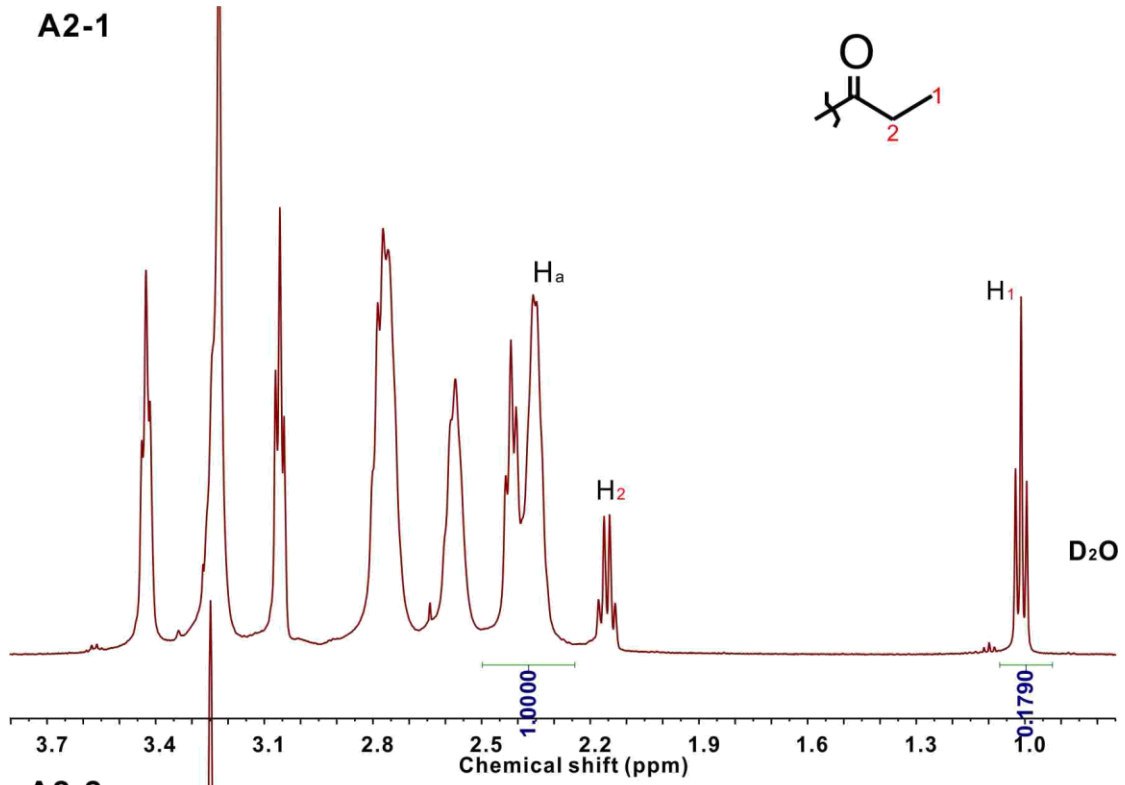

A2-2

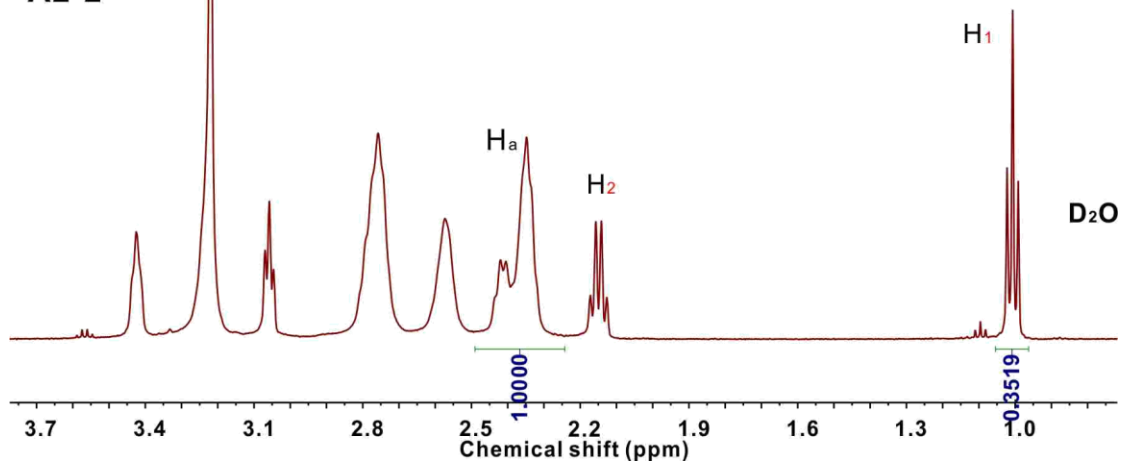

A3-1

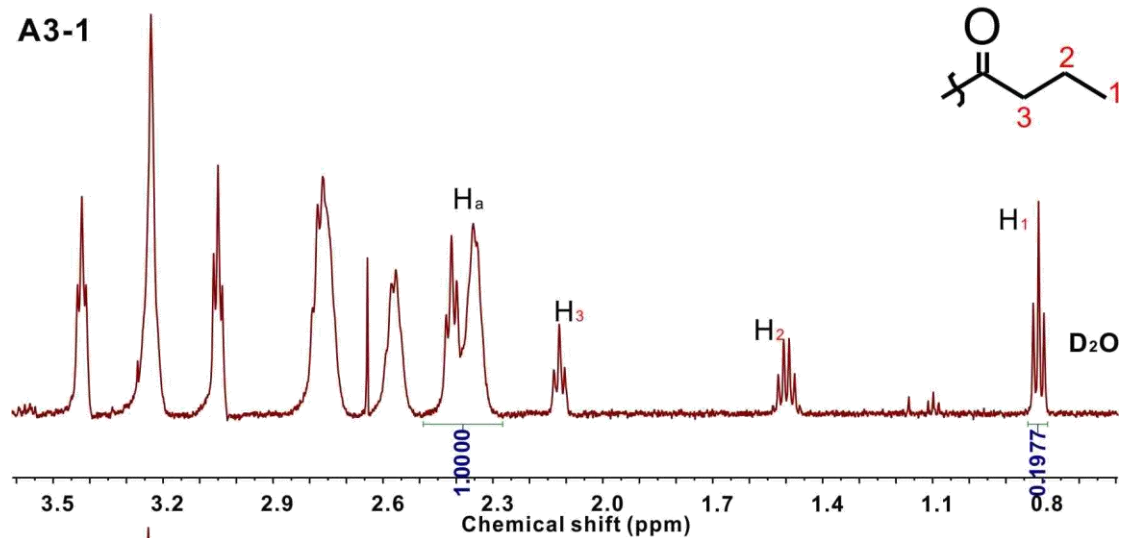

A3-2

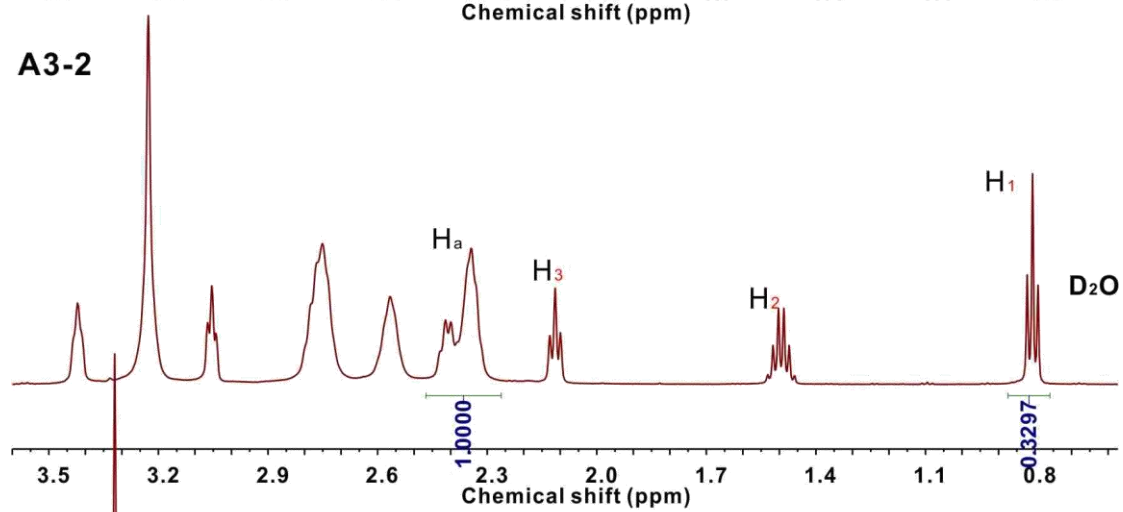

A3-3

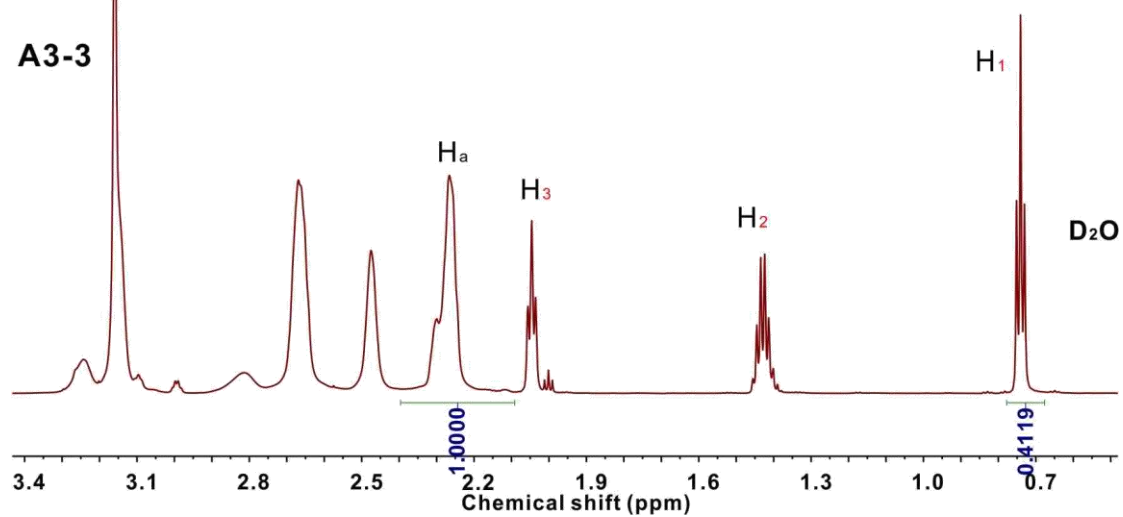

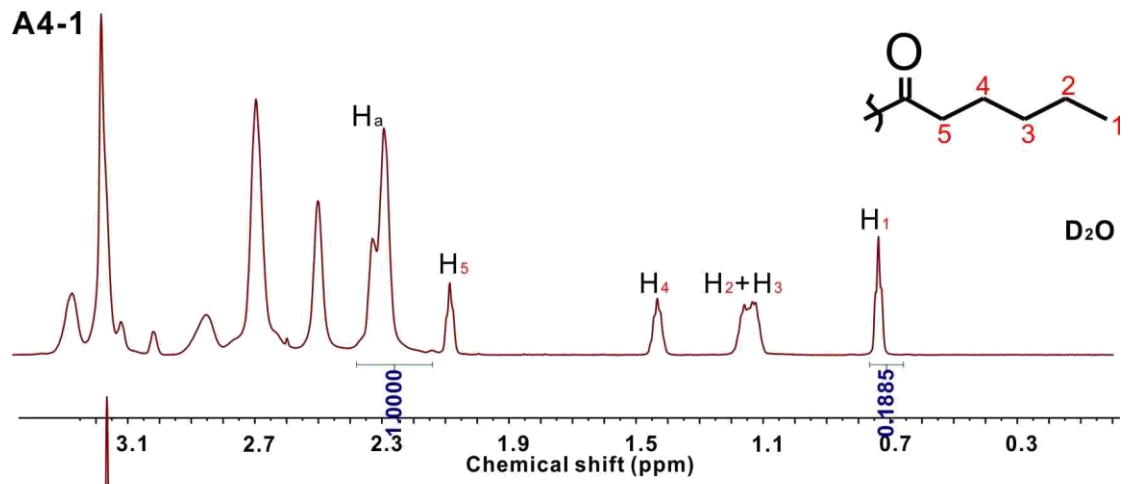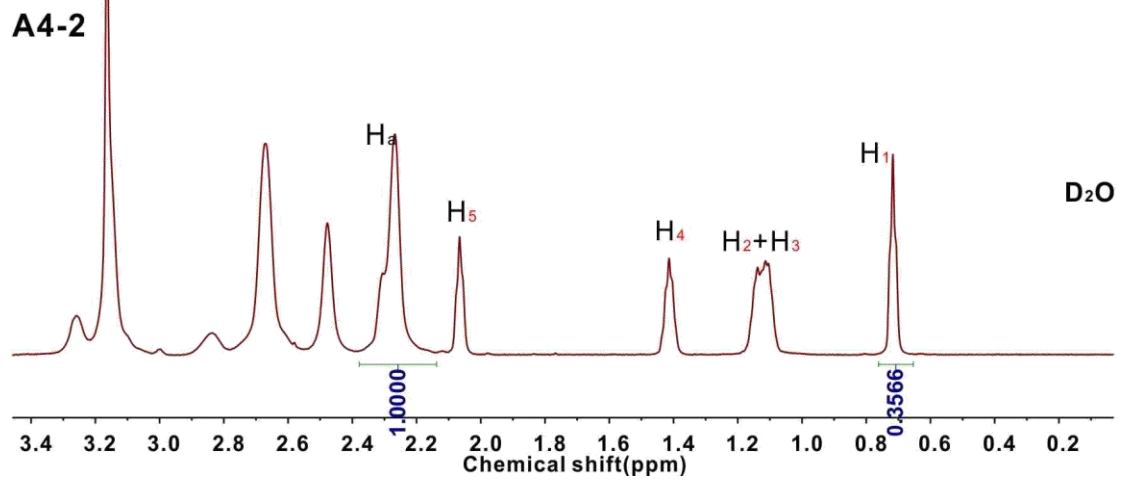

A5-1

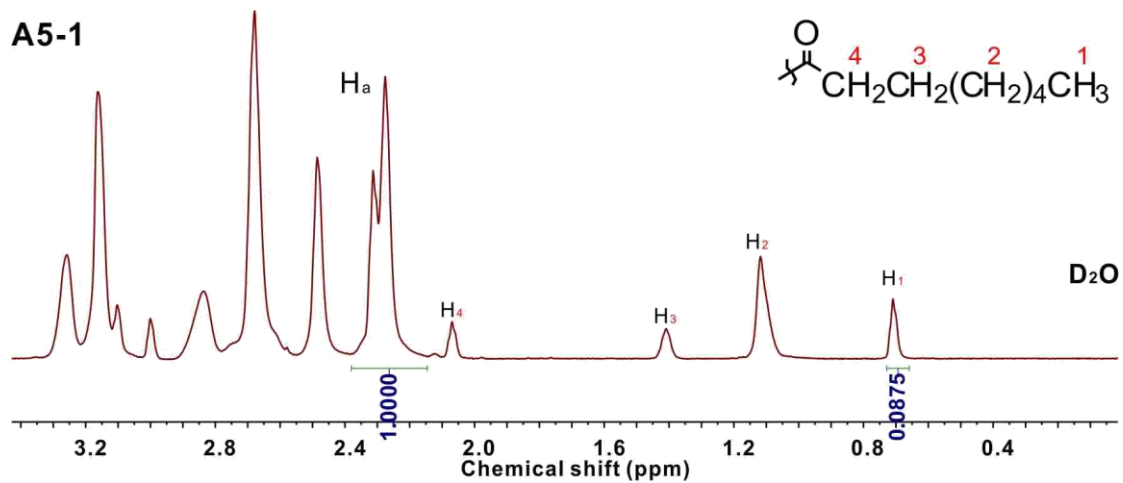

A5-2

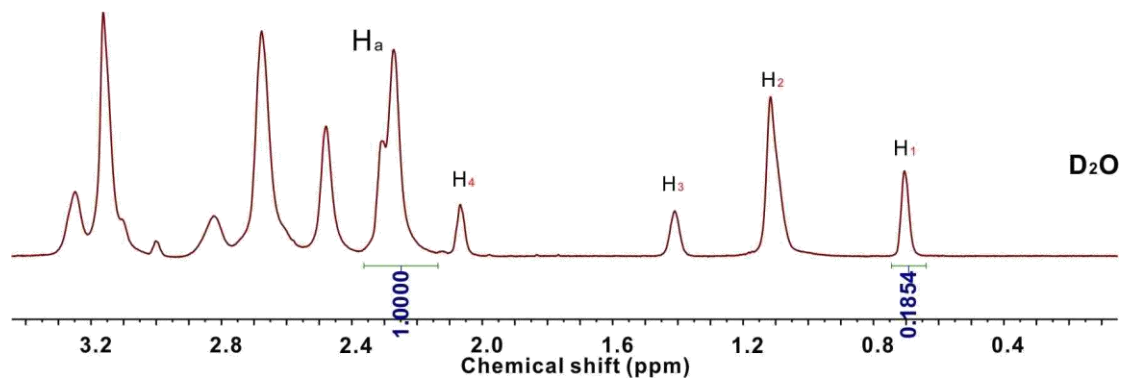

A6-1

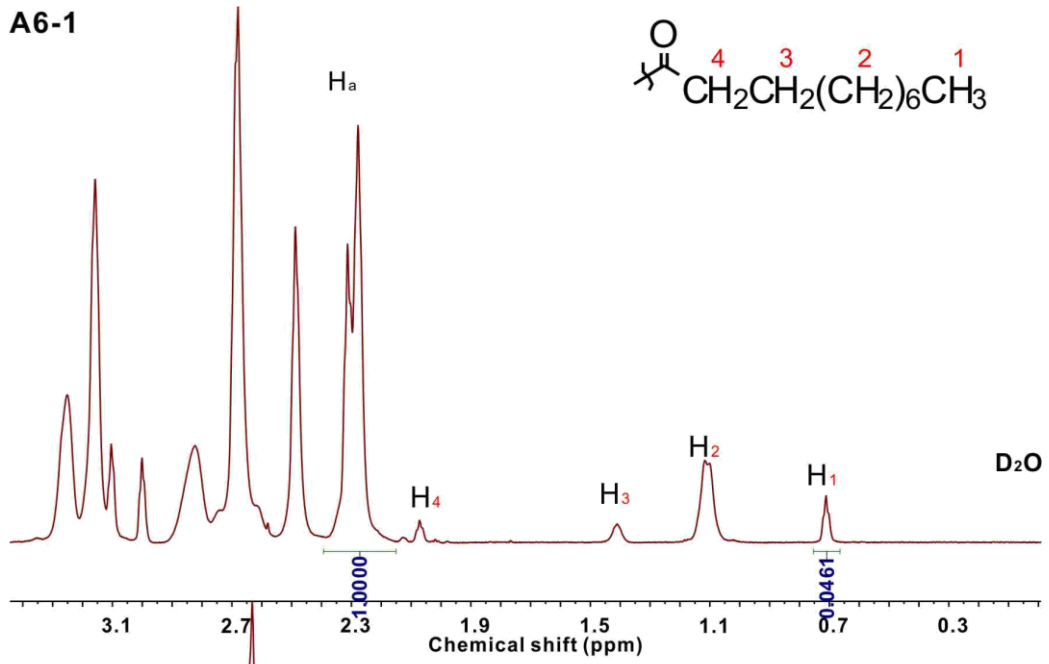

A6-2

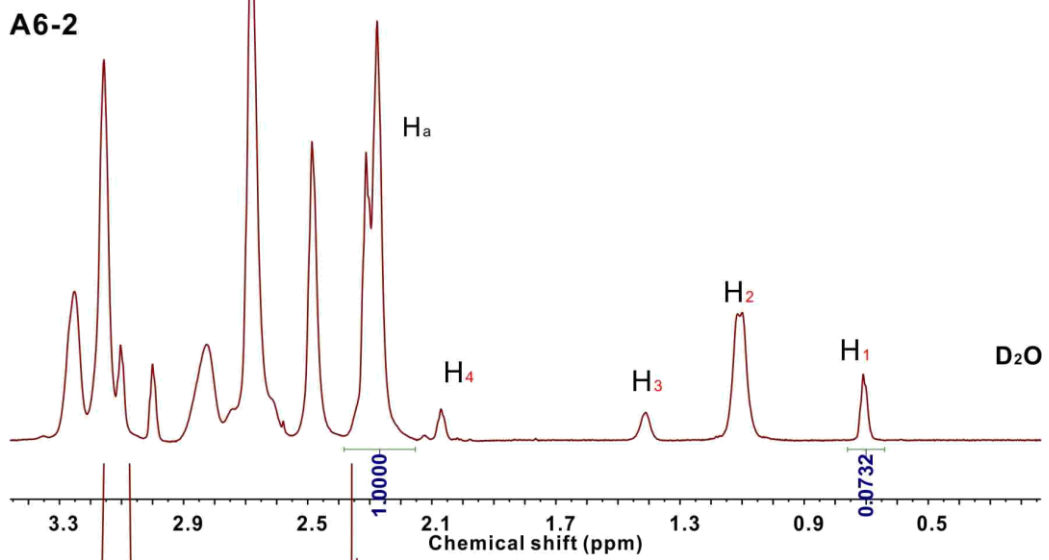

A6-3

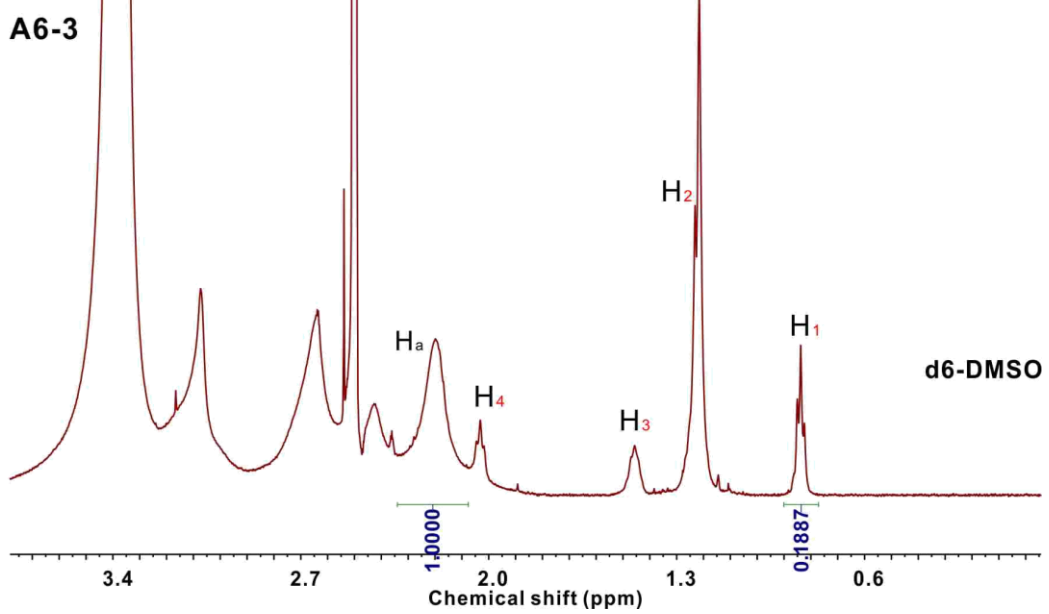

A7-1

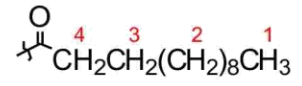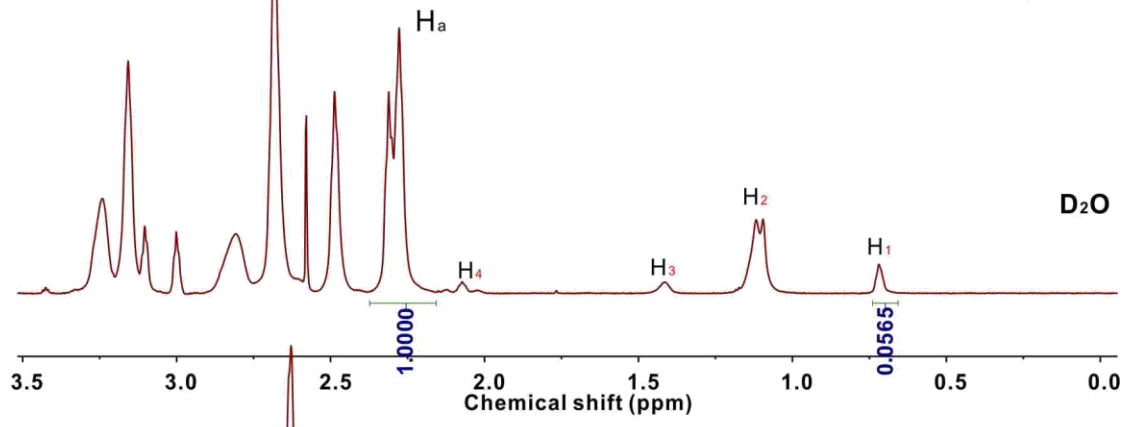

A7-2

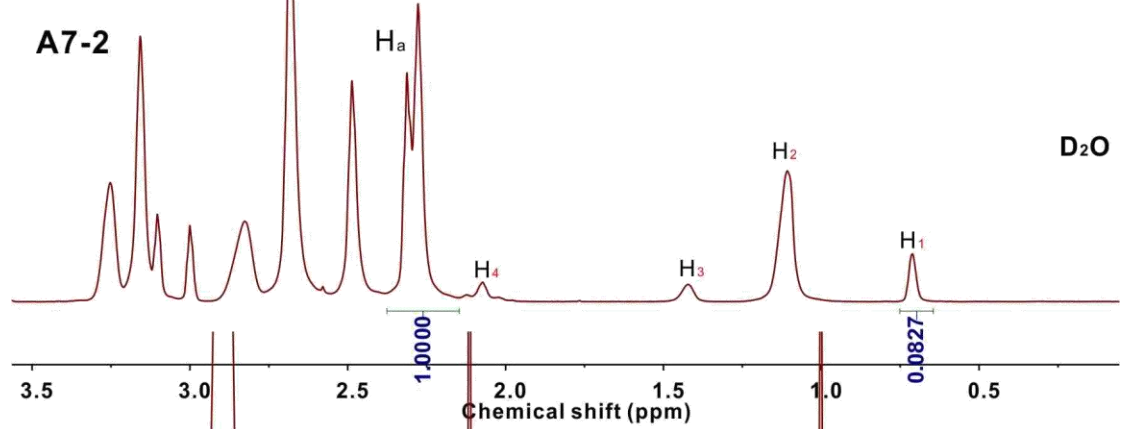

A7-3

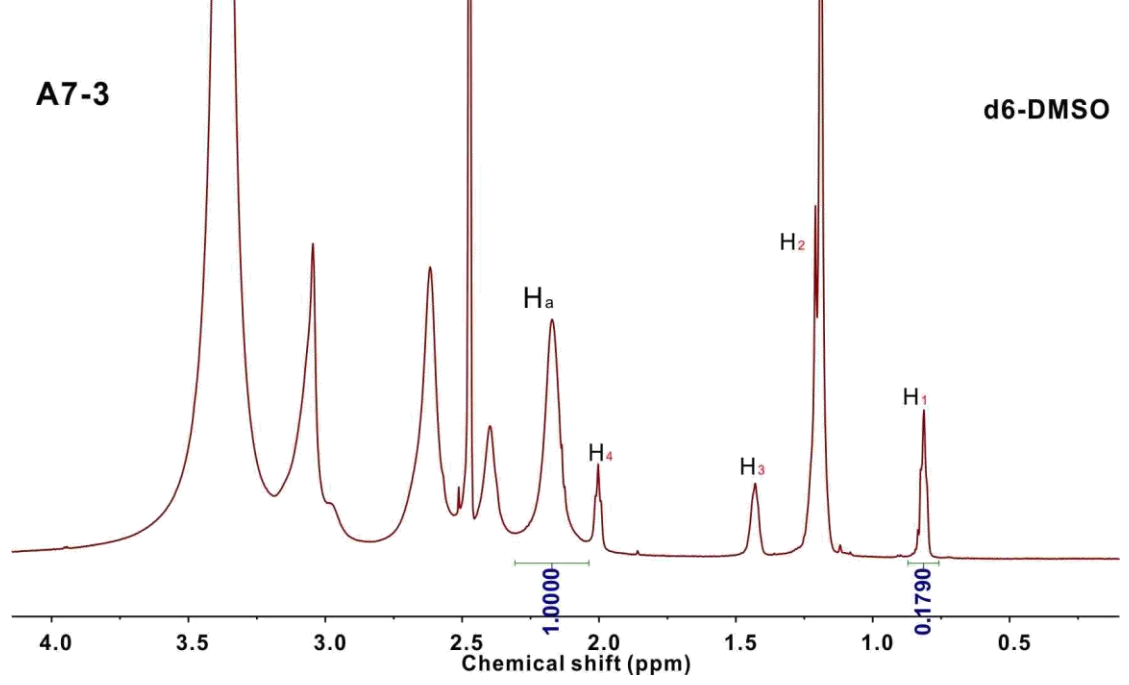



A8-1

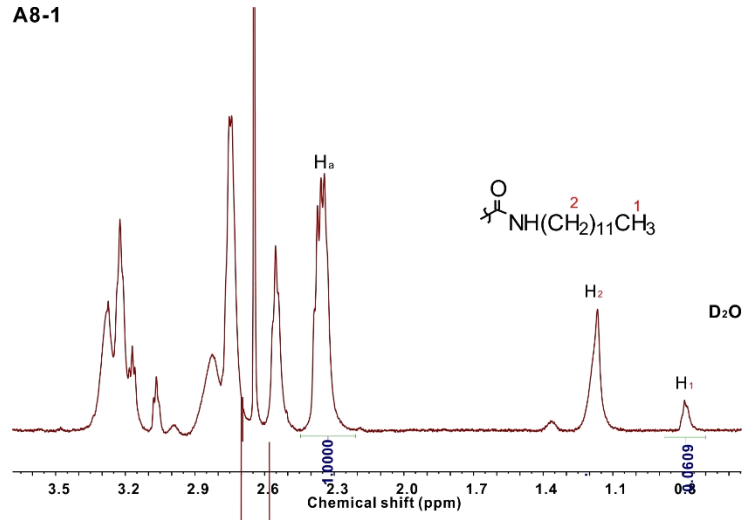

A8-2

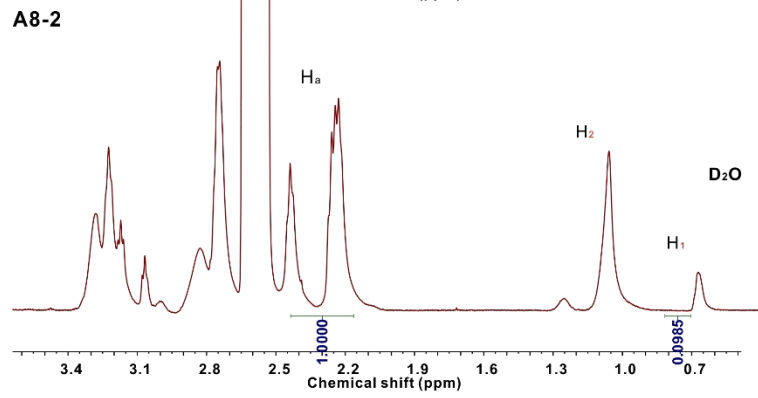

A8-3

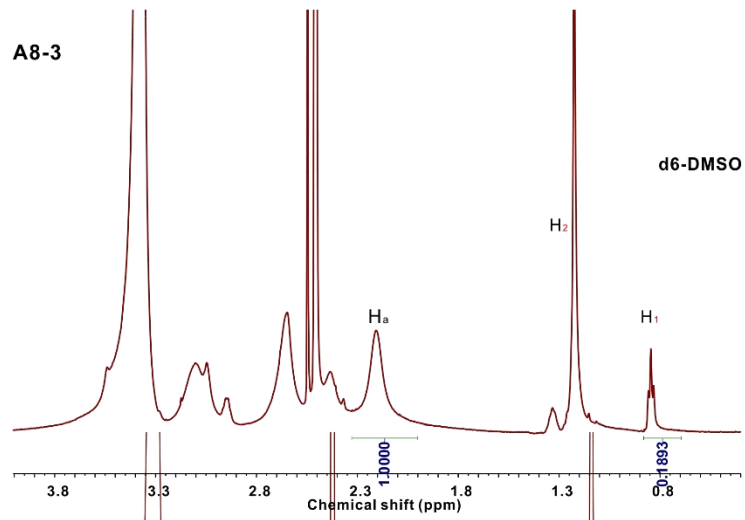

A8-4

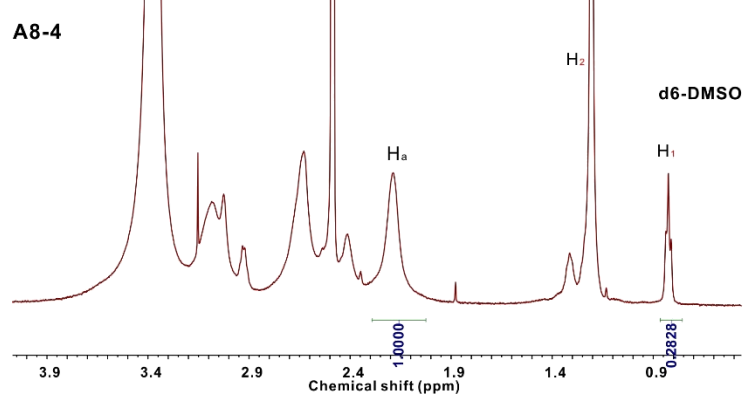

A9-1

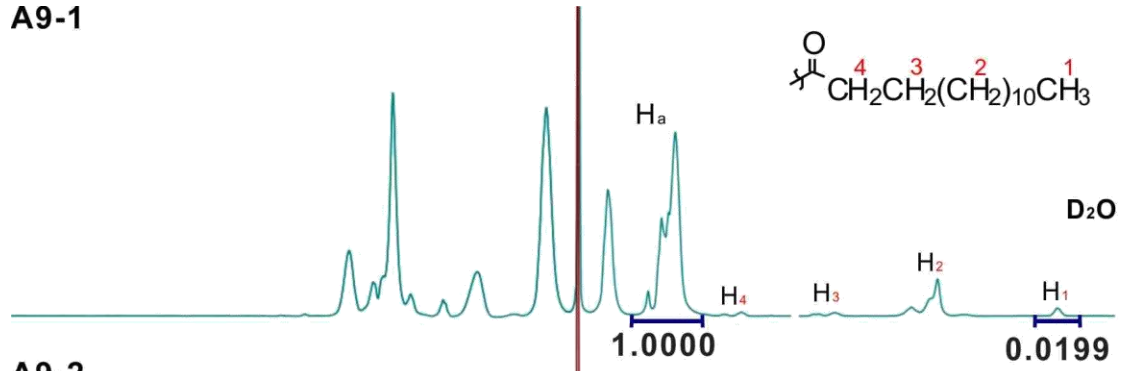

A9-2

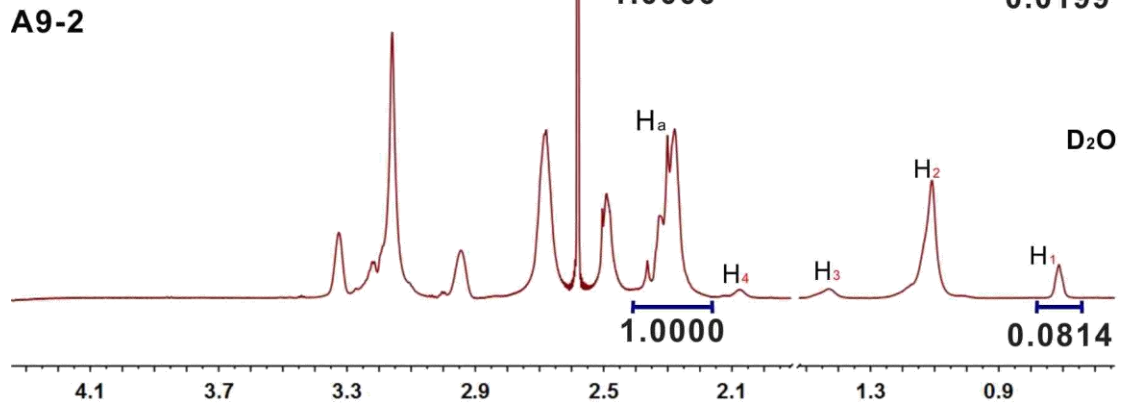

A9-3

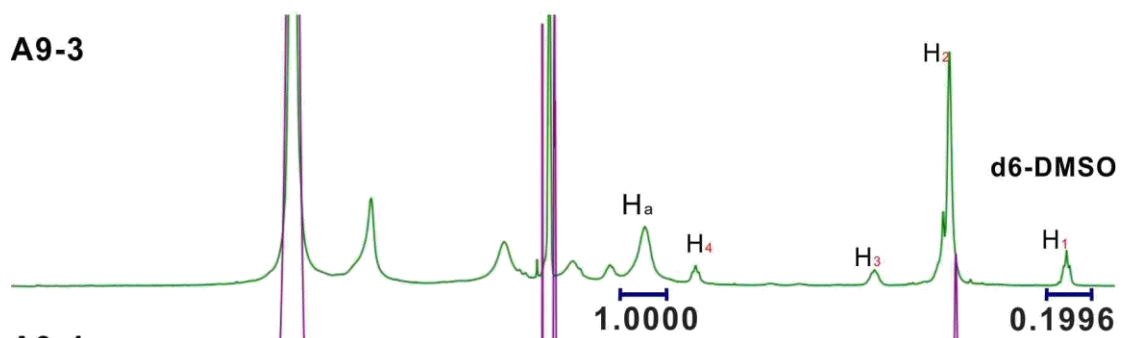

A9-4

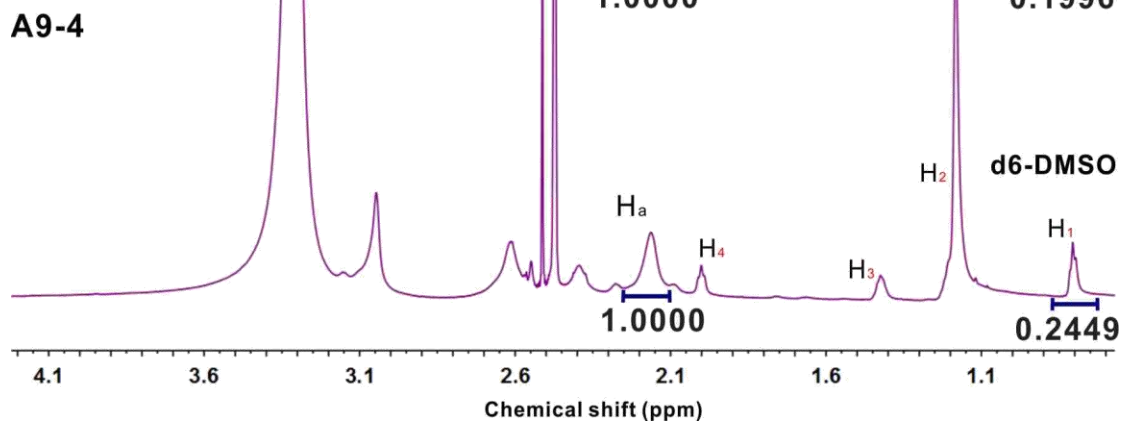

A10-1

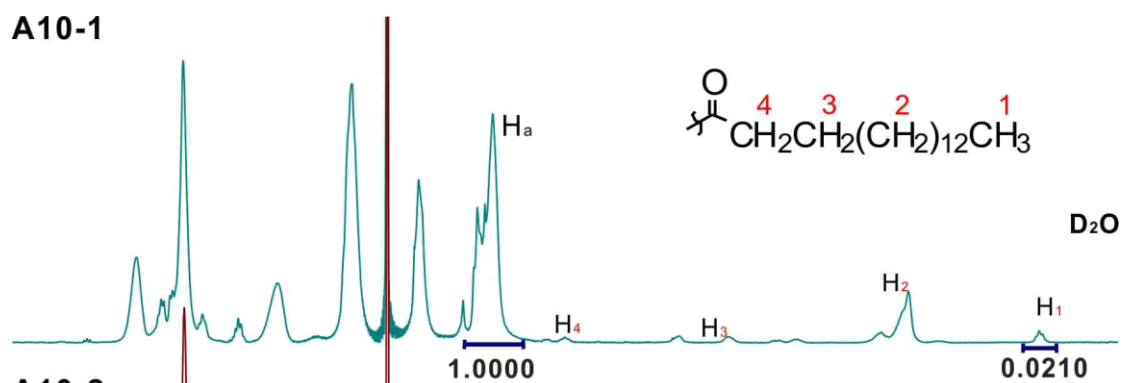

A10-2

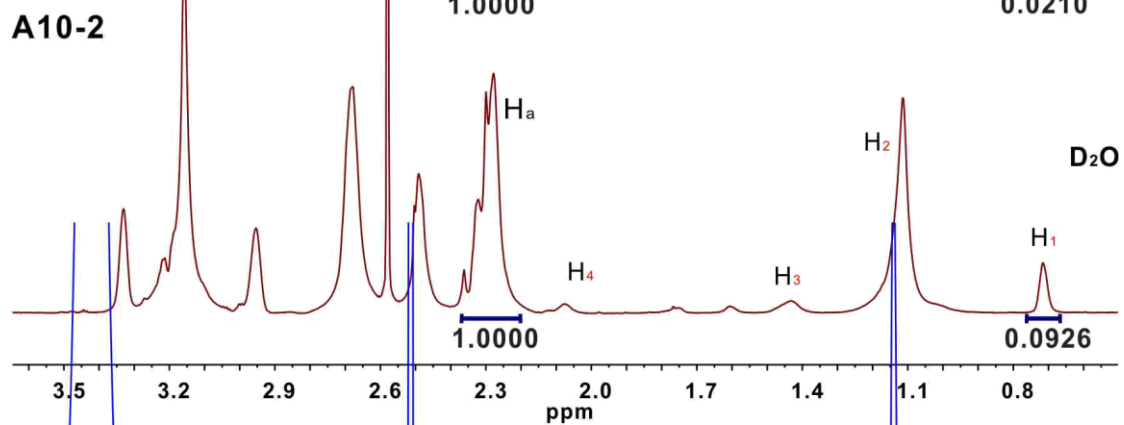

A10-3

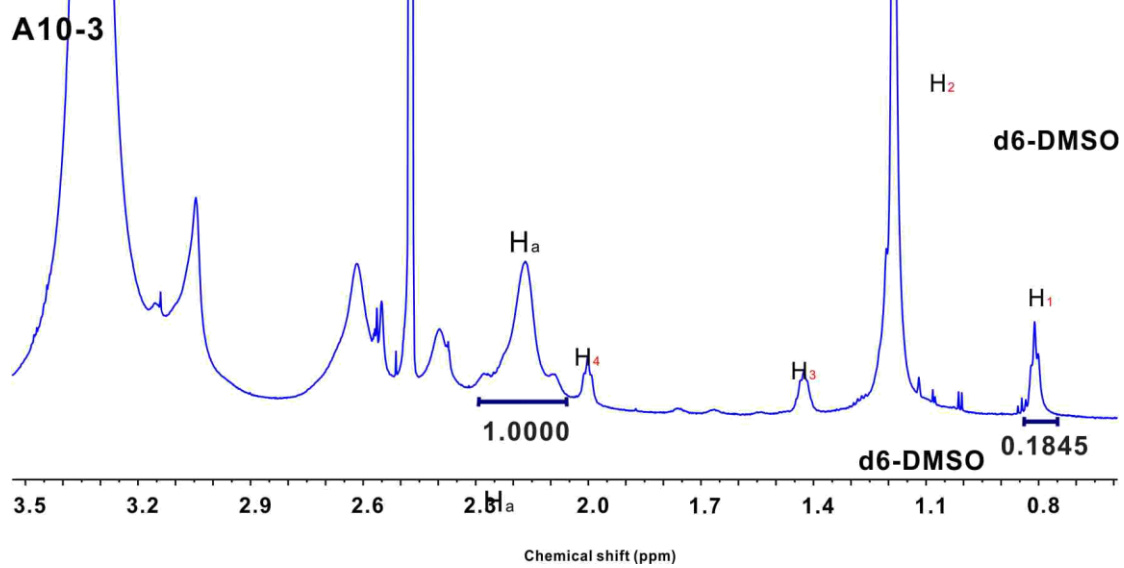

A11-1

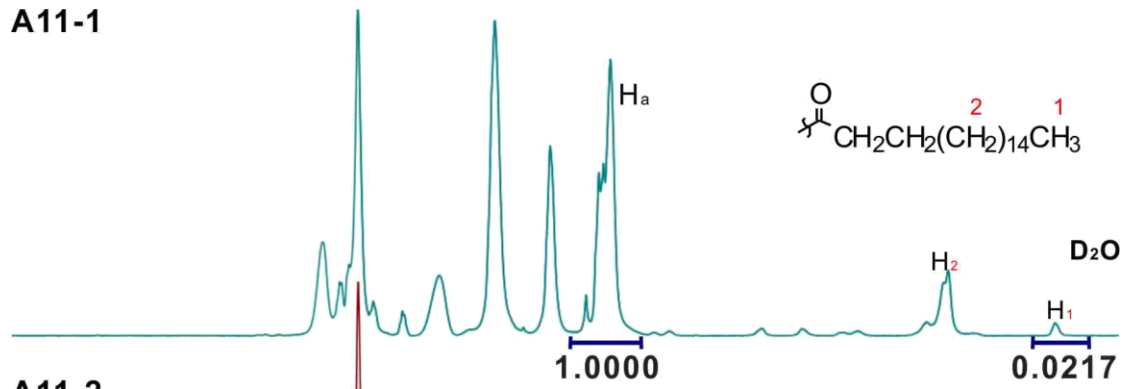

A11-2

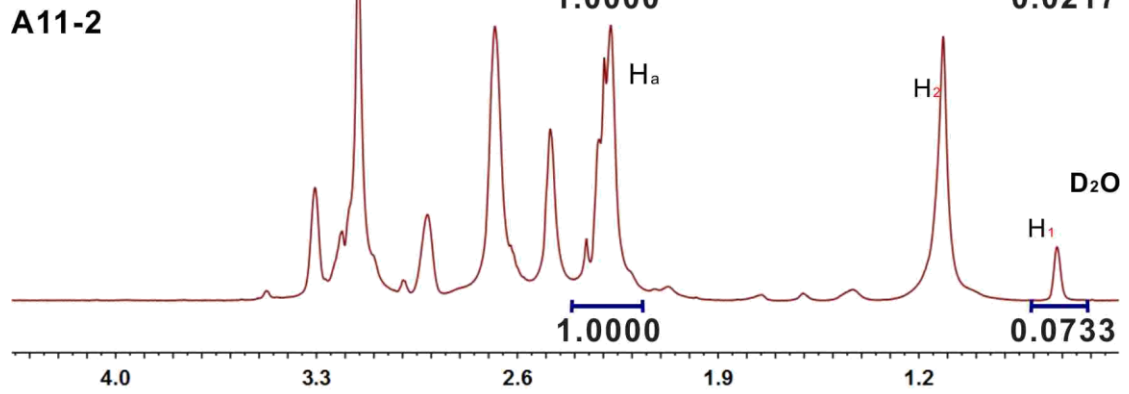

A11-3

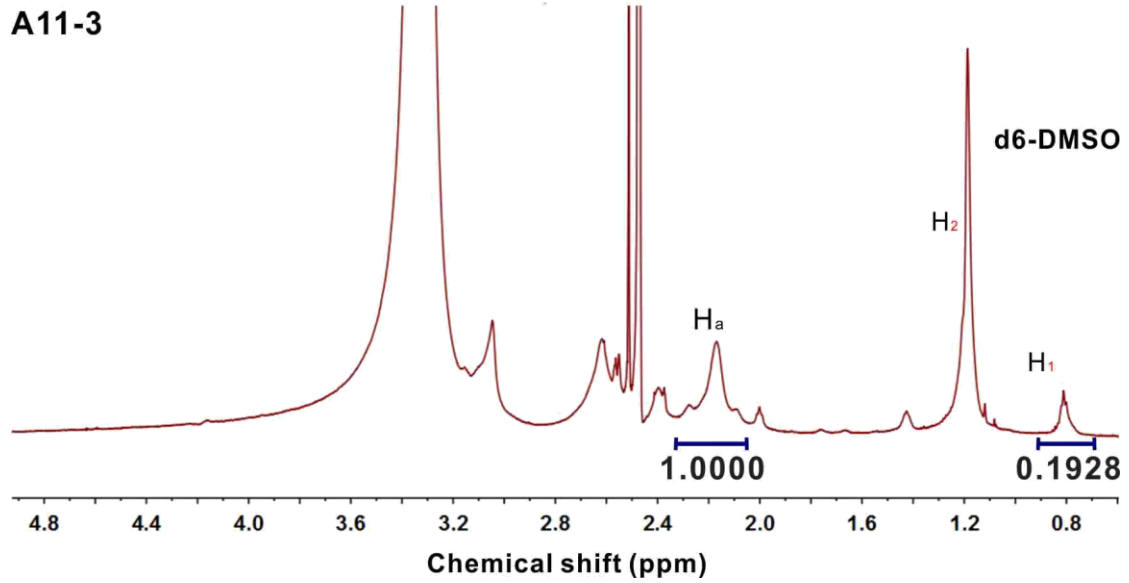

A12-1

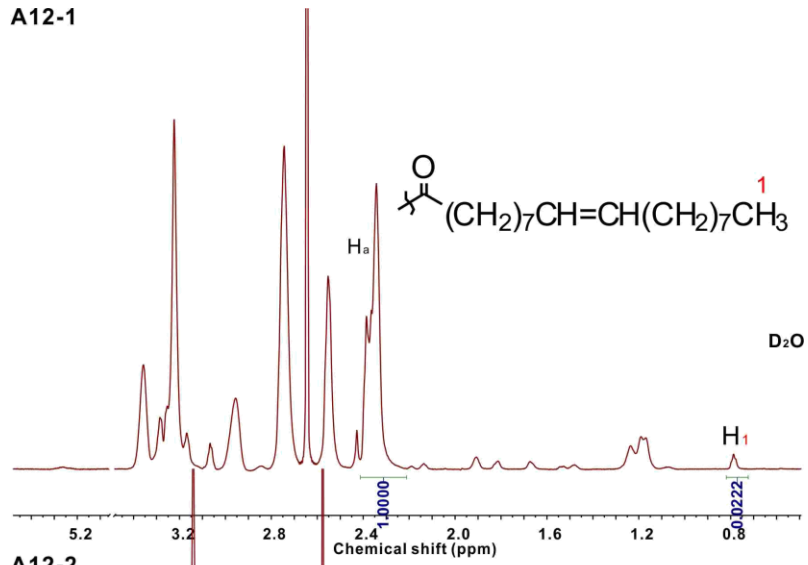

A12-2

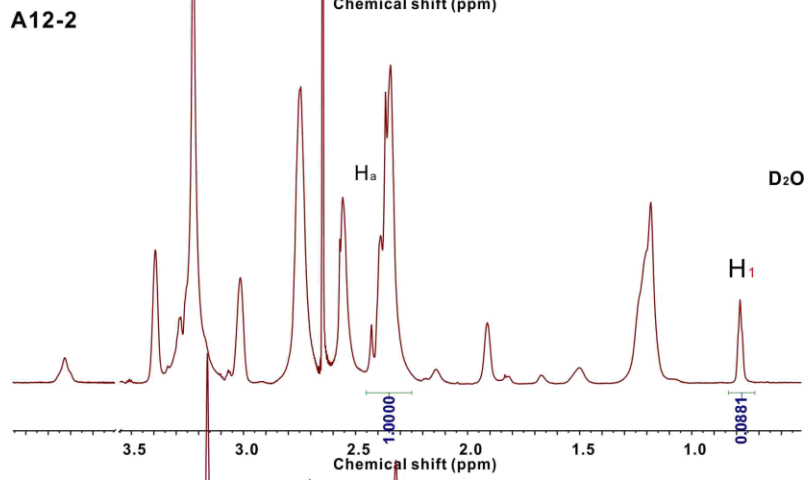

A12-3

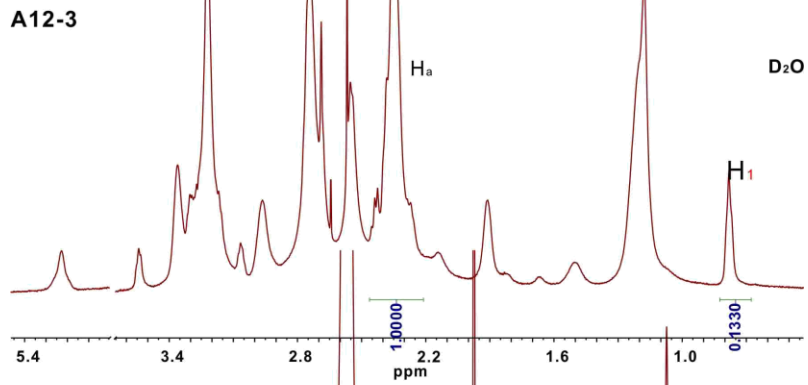

A12-4

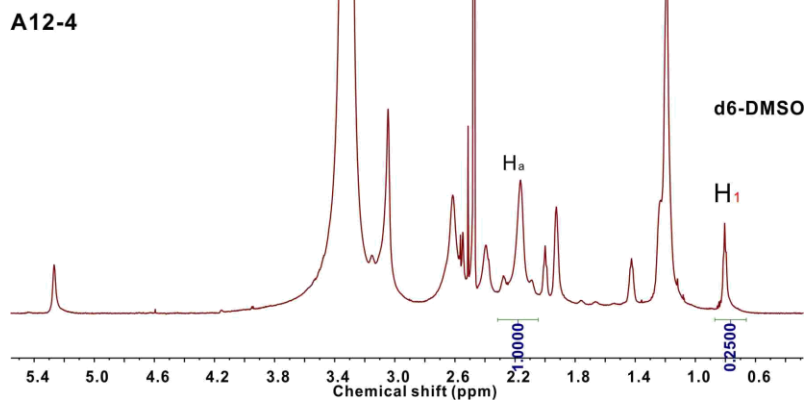

A13-1

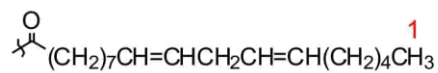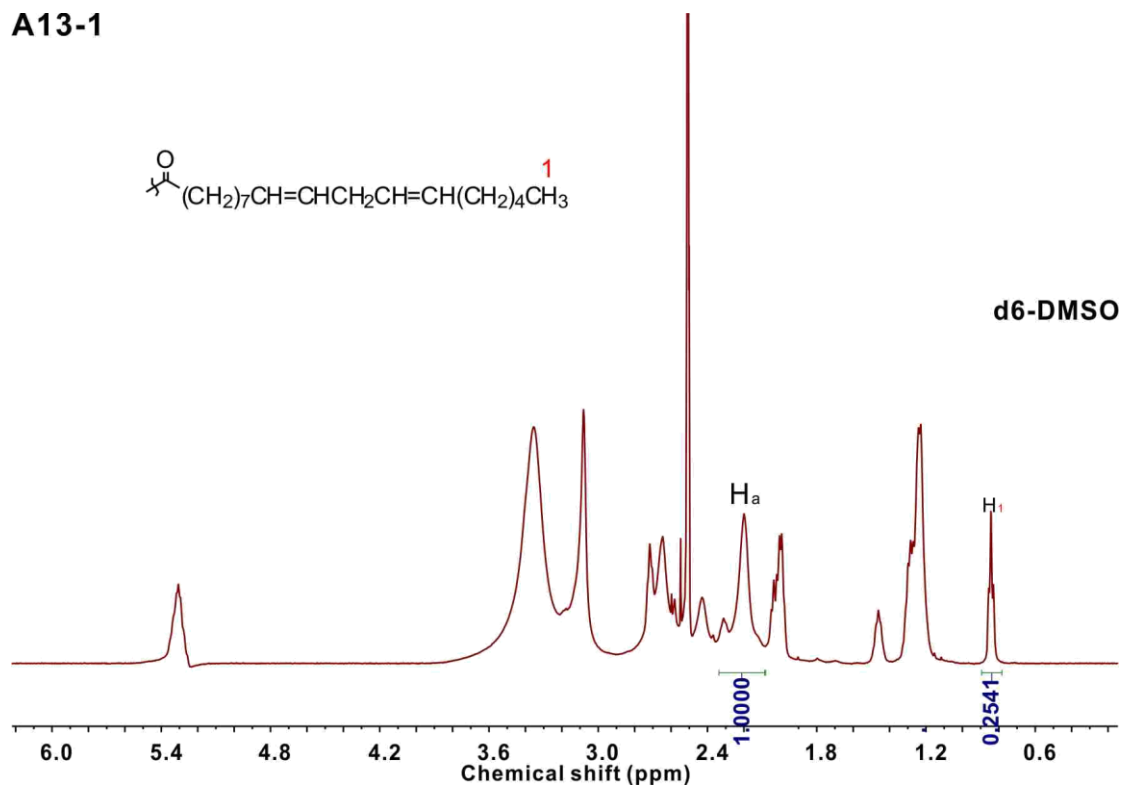

A18-1

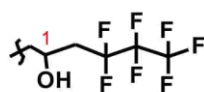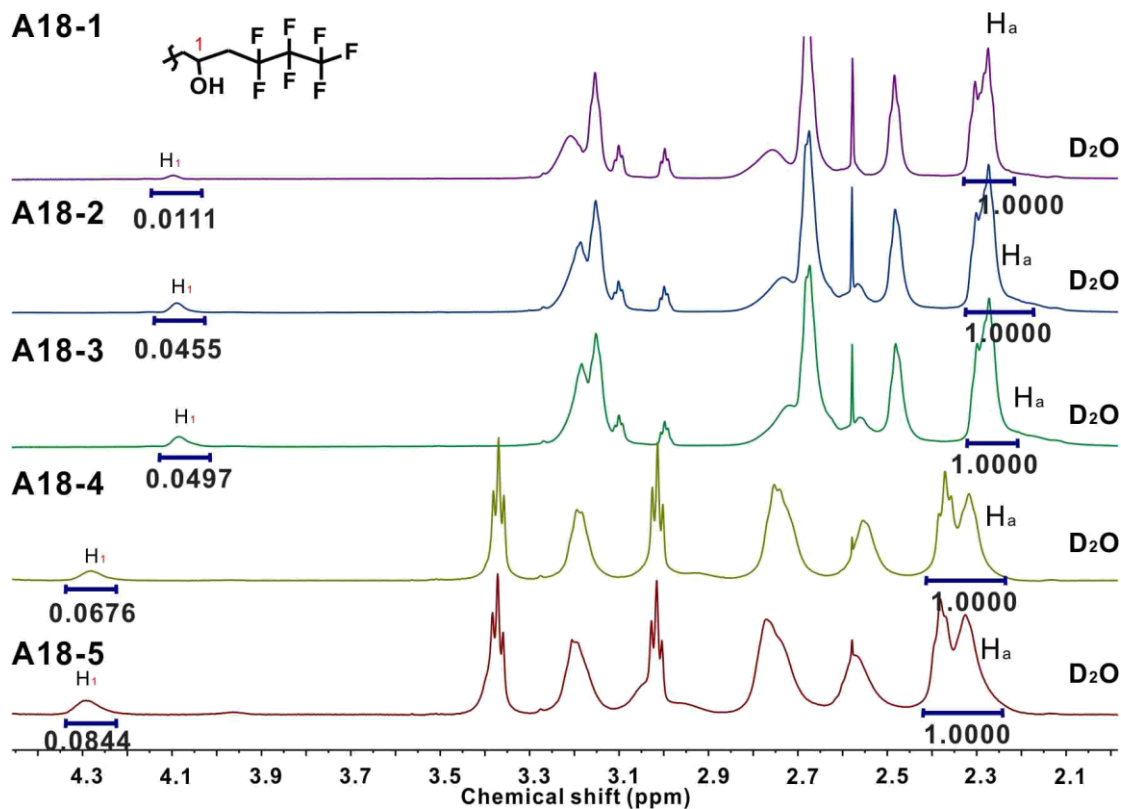

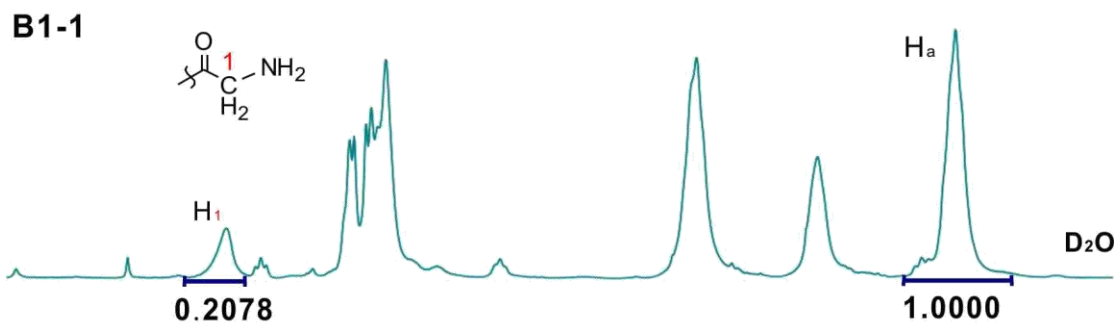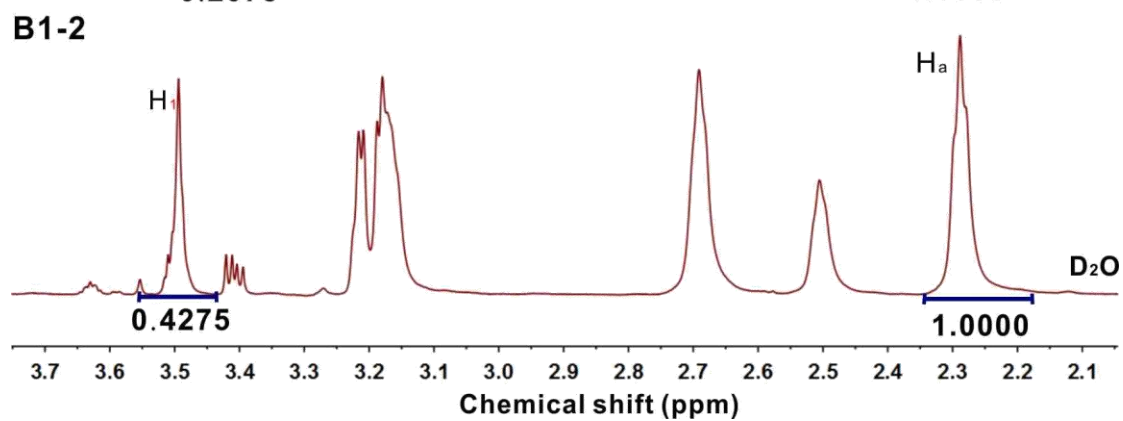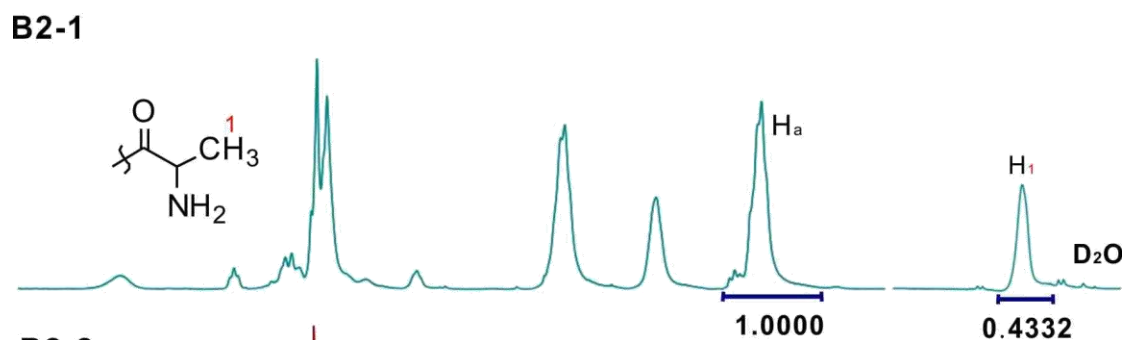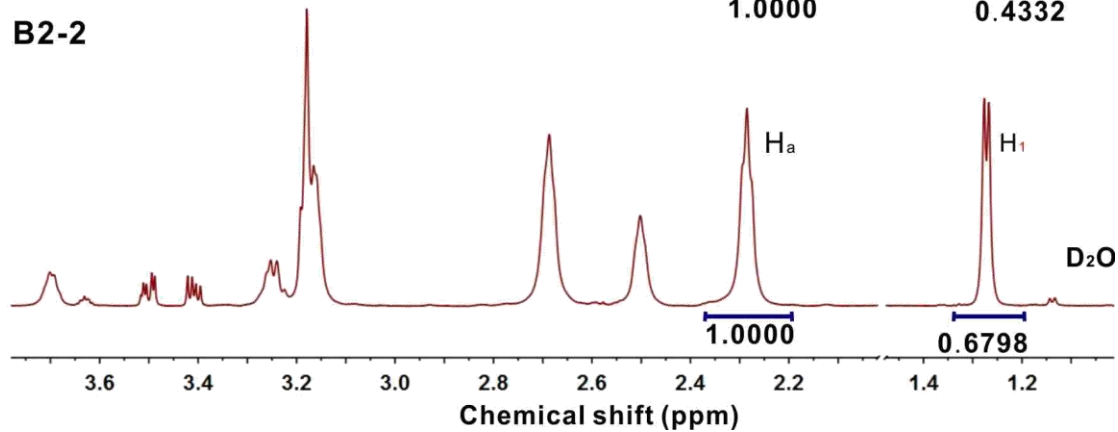

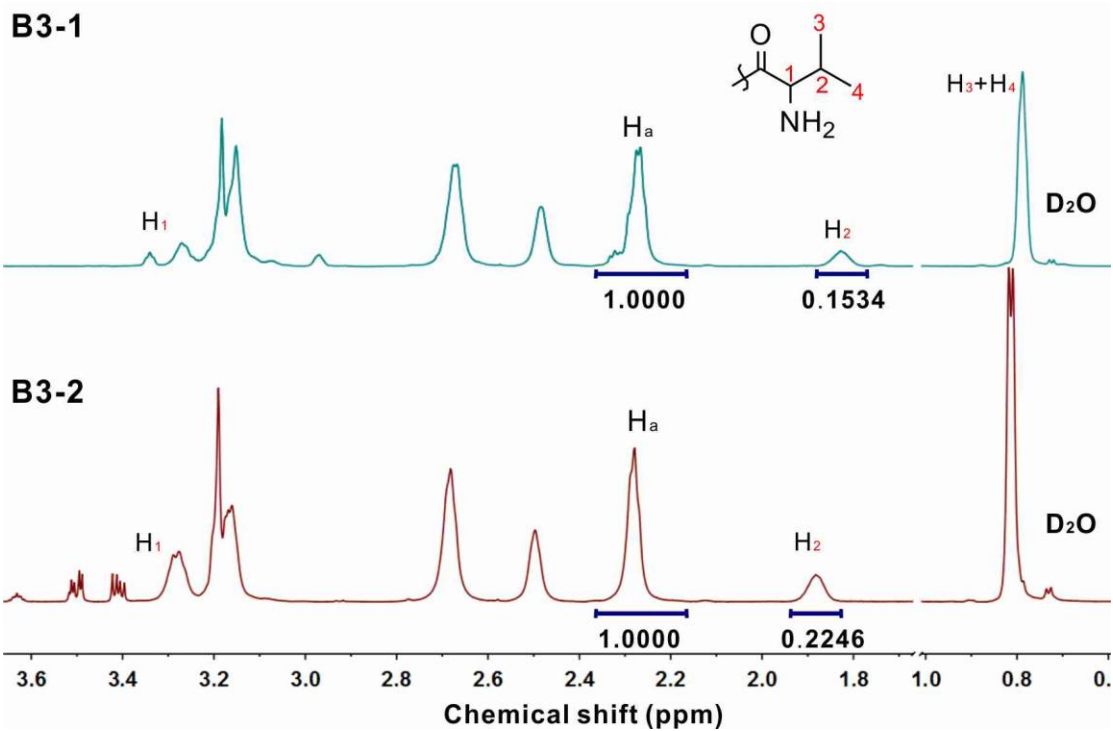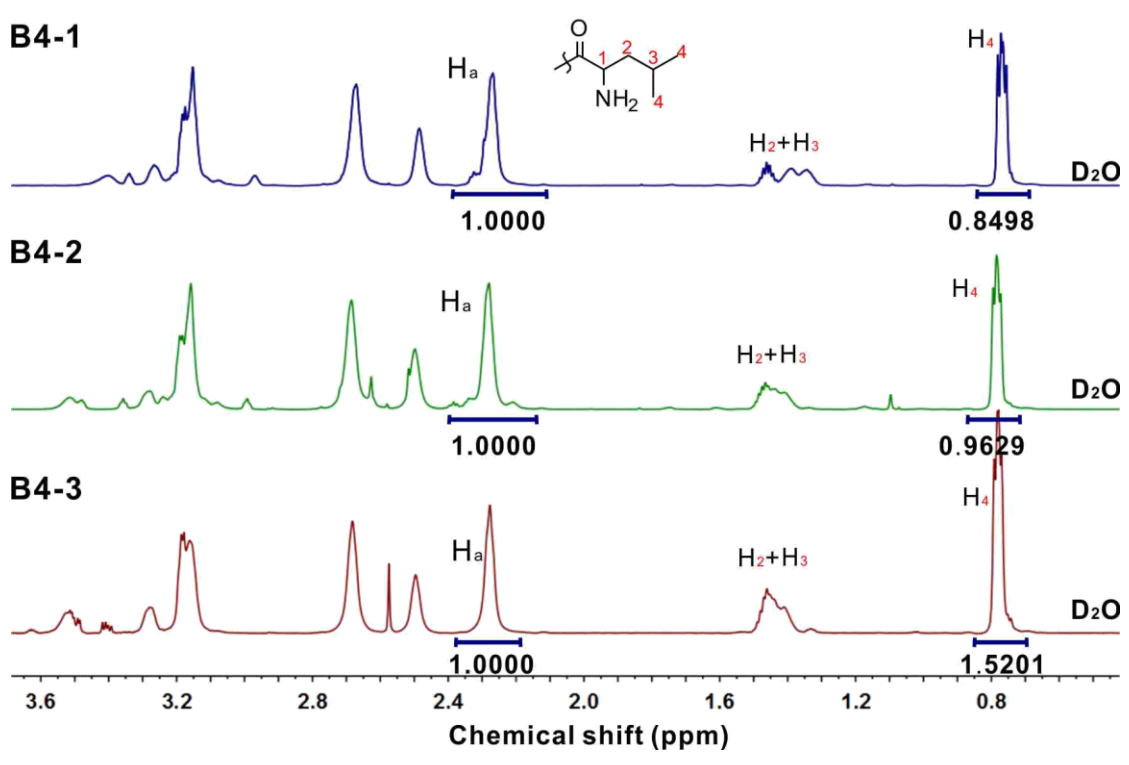



B5-1

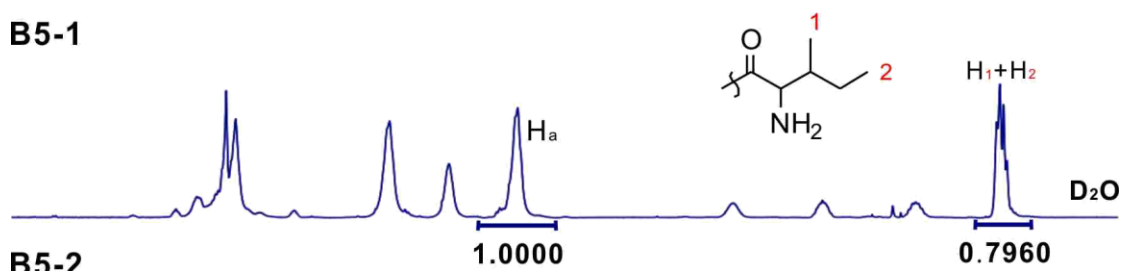

B5-2

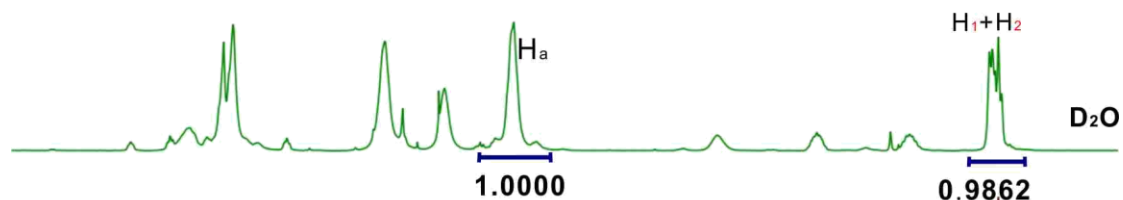

B5-3

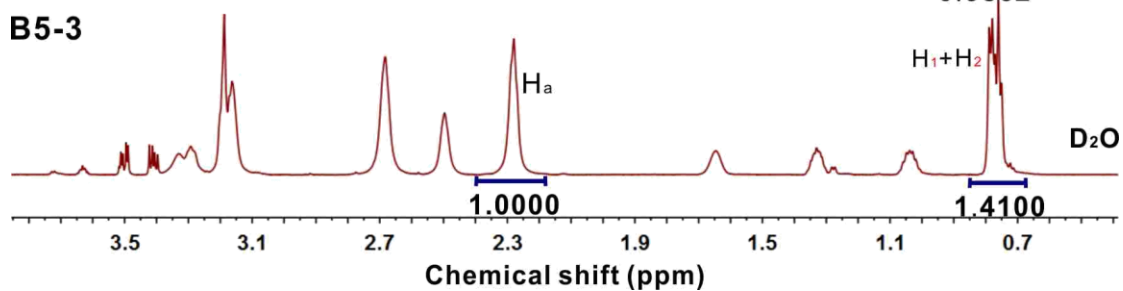

B6-1

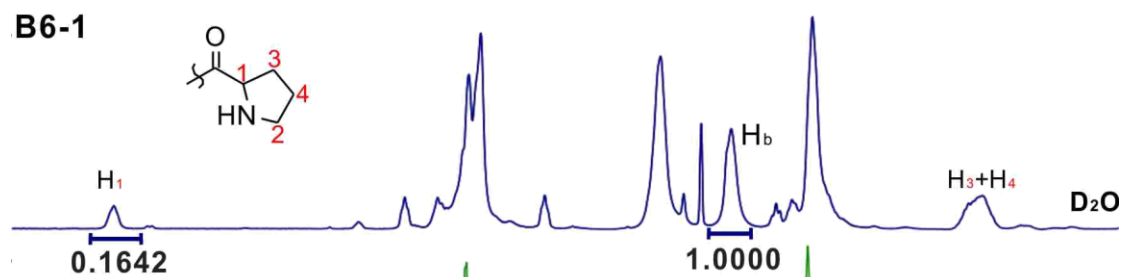

B6-2

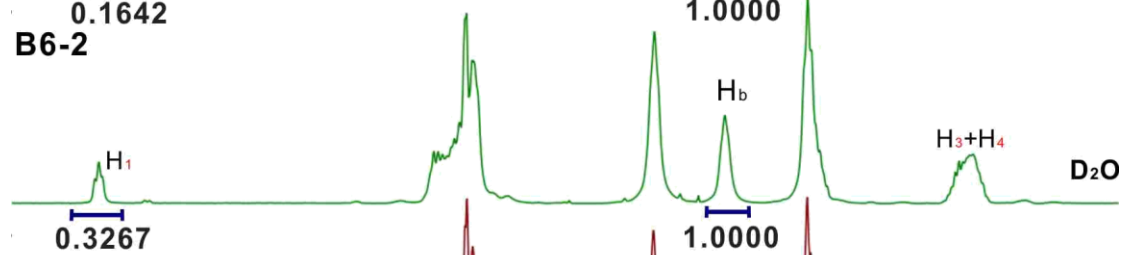

B6-3

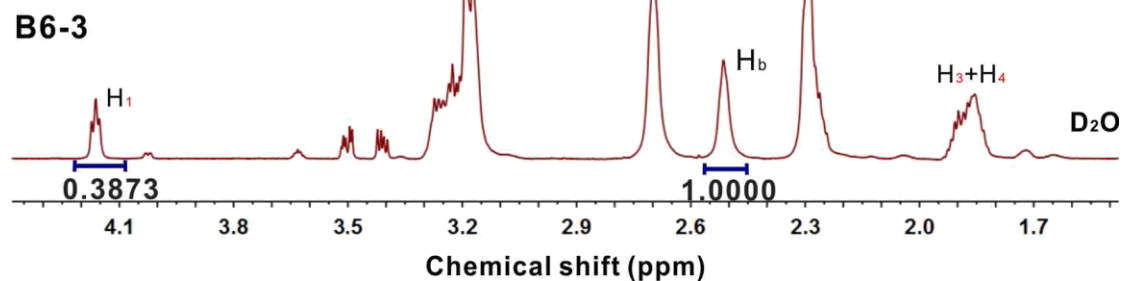

**B7-1**

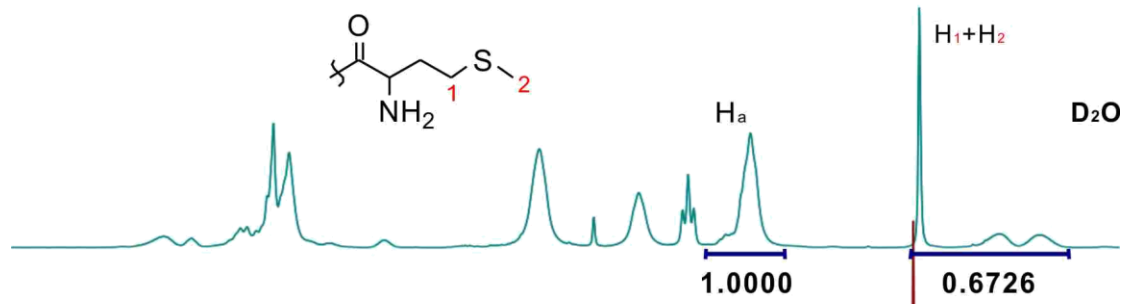

**B7-2**

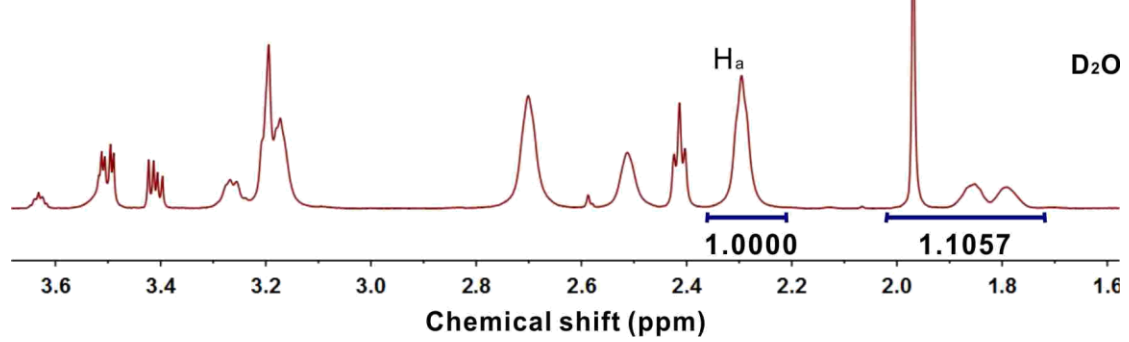

**B8-1**

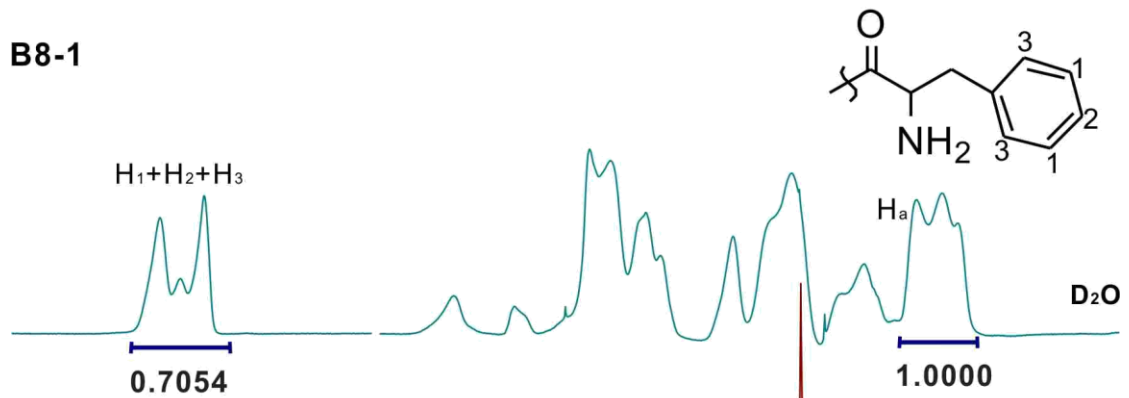

**B8-2**

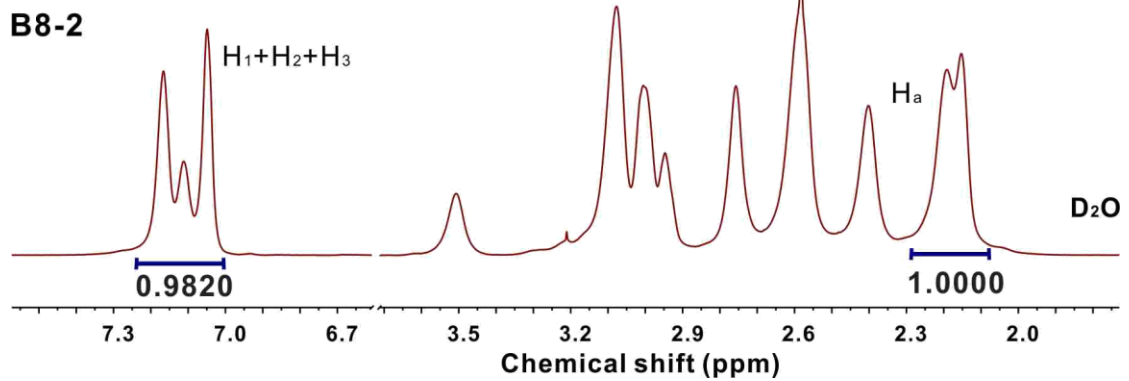

**B9-1**

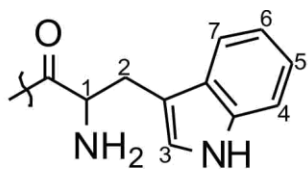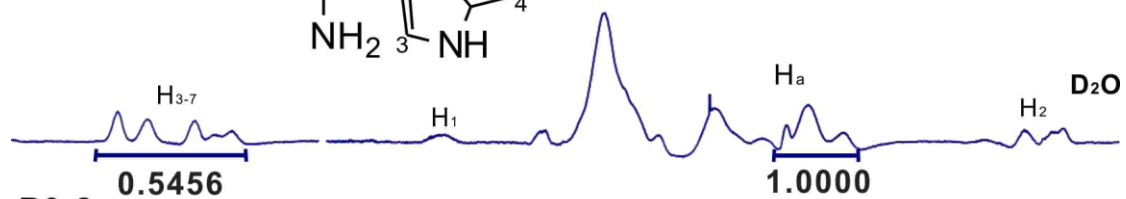

**B9-2**

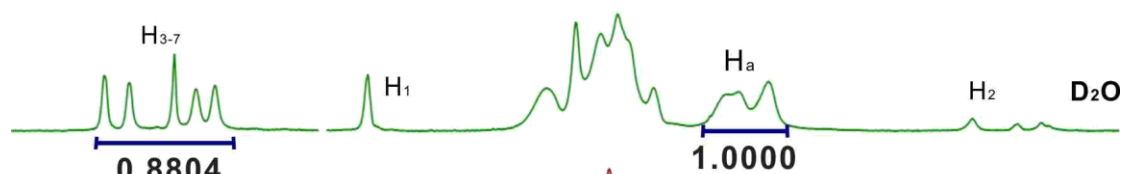

**B9-3**

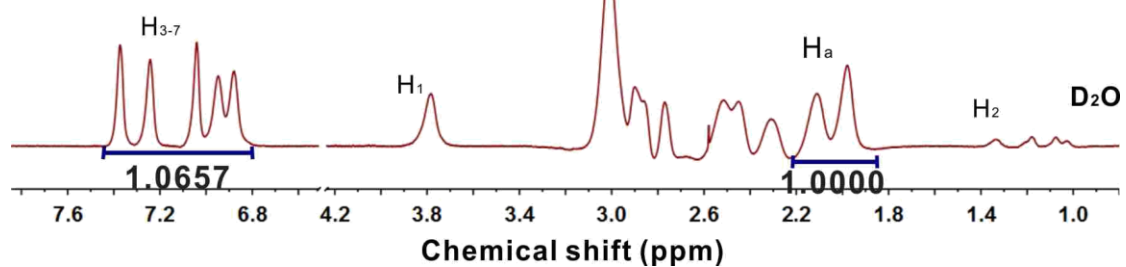

B10-1

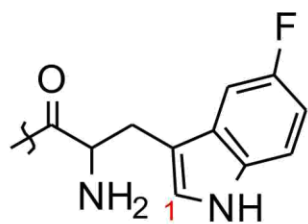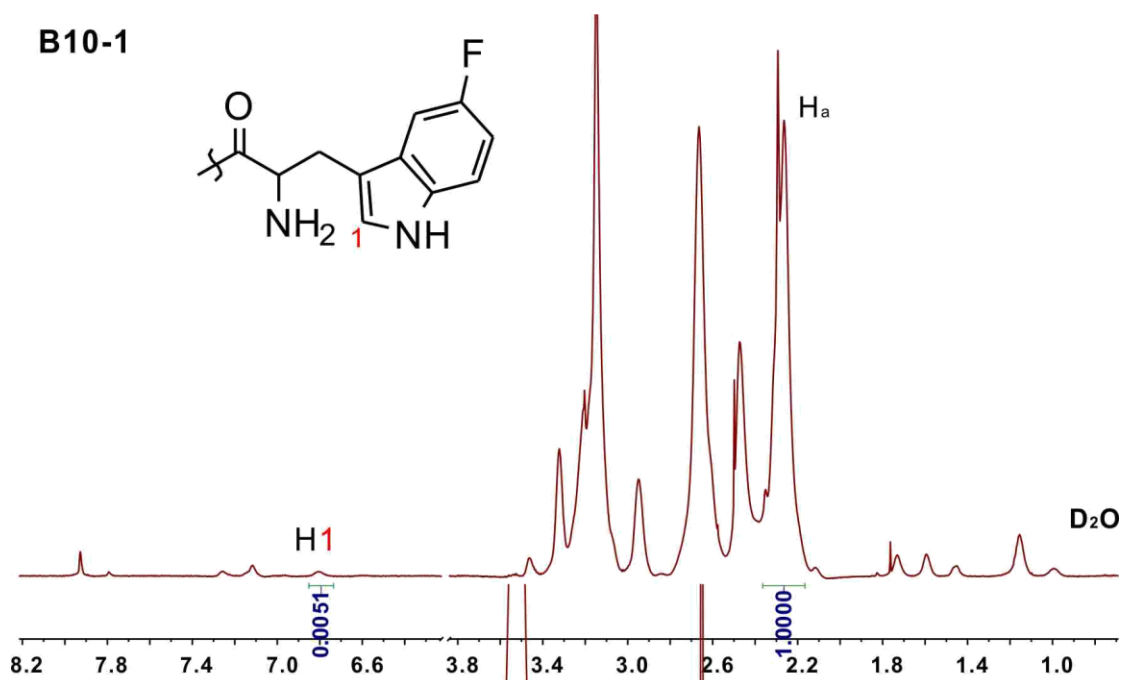

B10-2

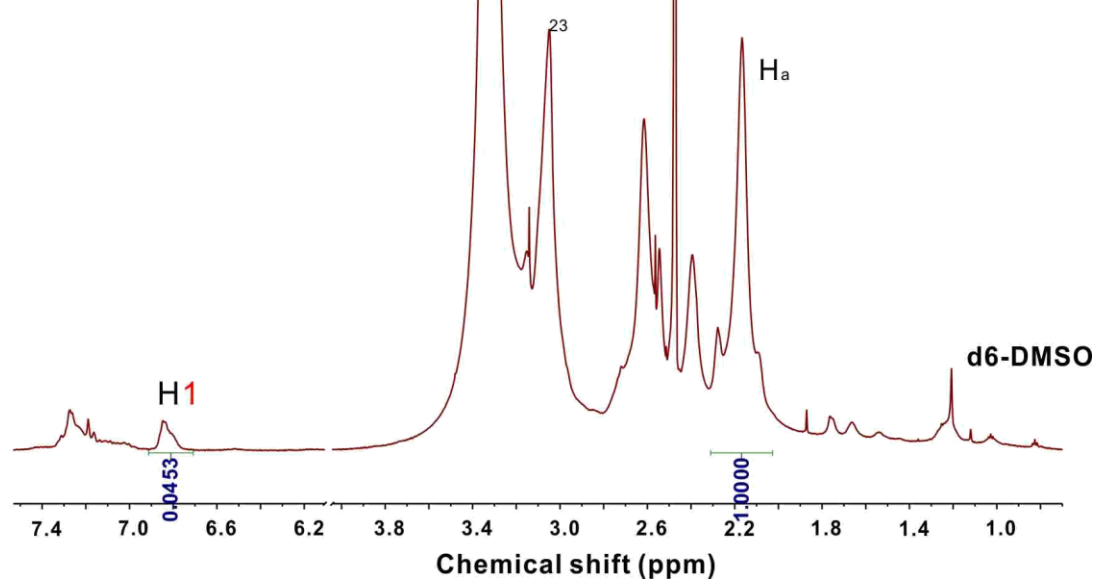

B11-1

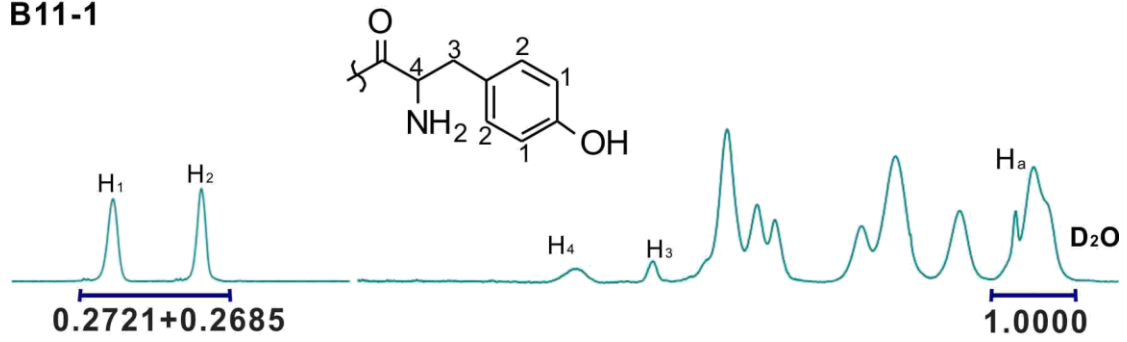

B11-2

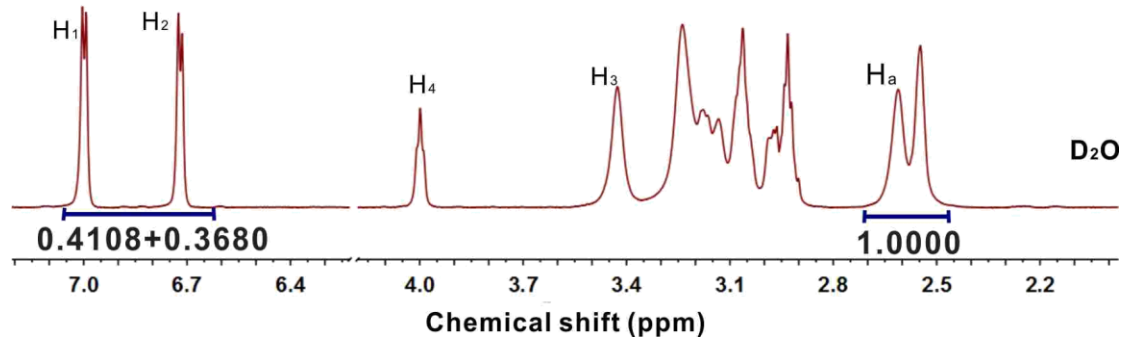

B12-1

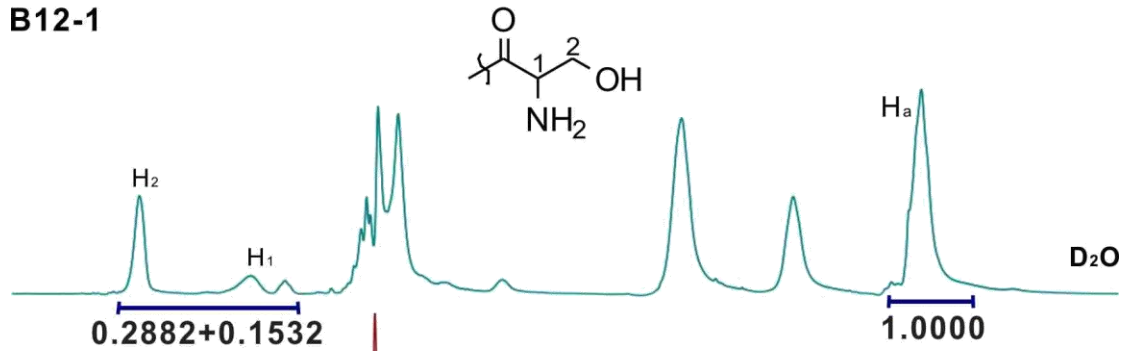

B12-2

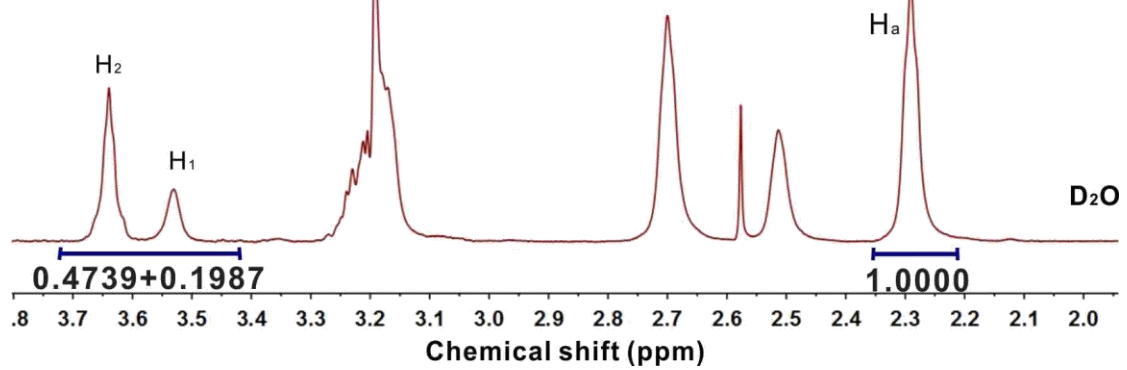

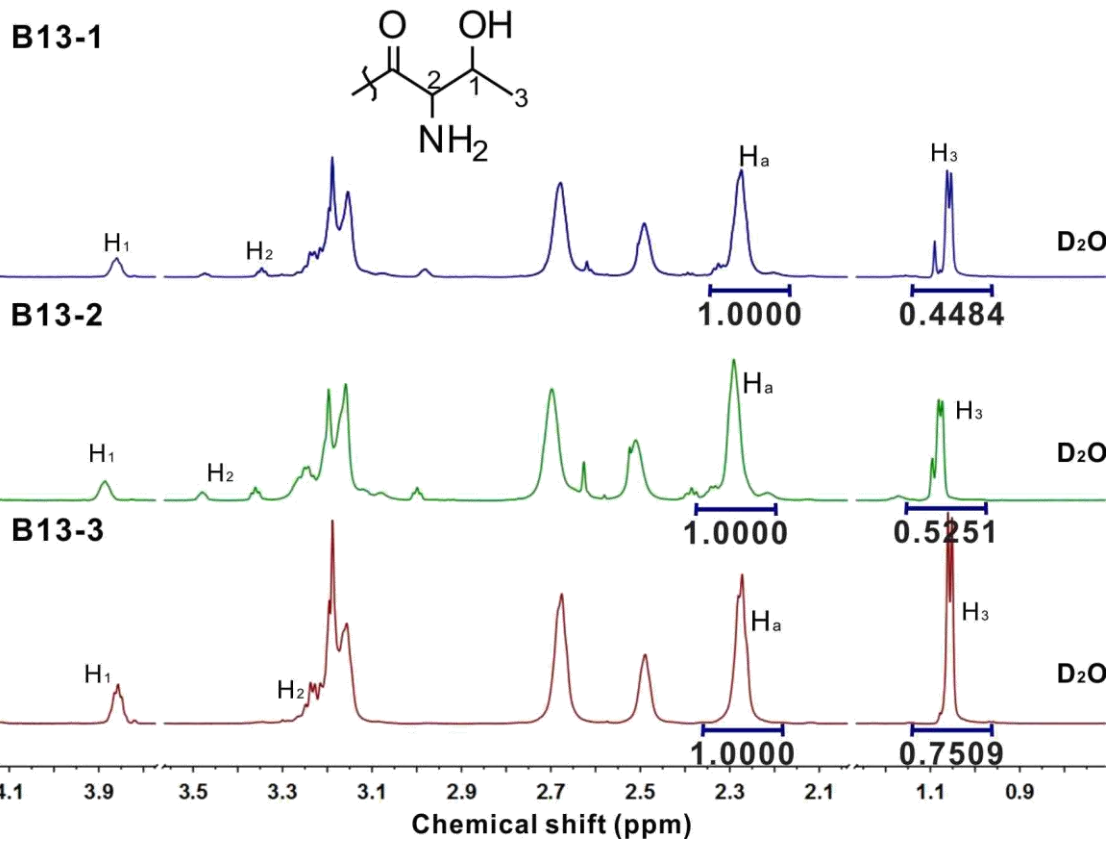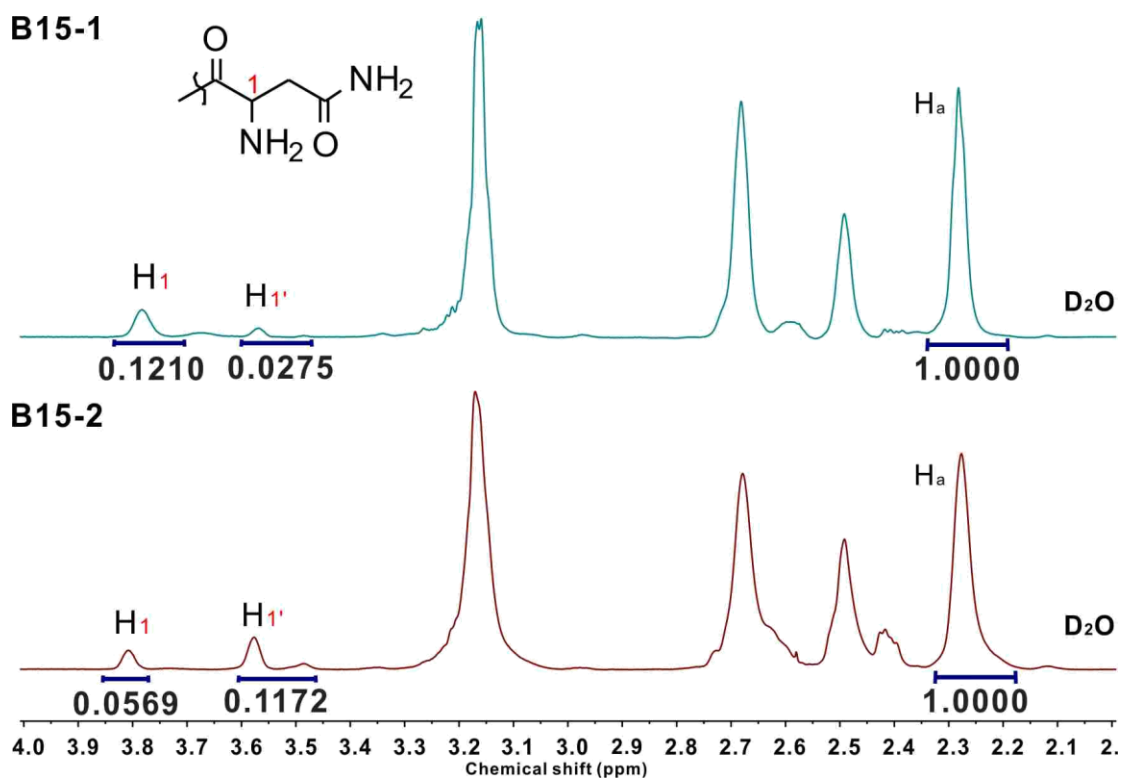

B16-1

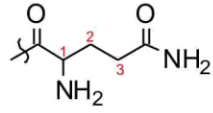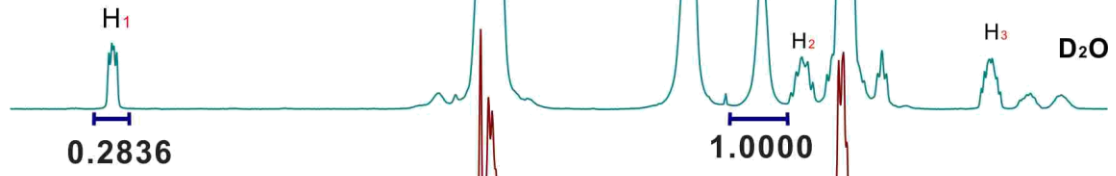

B16-2

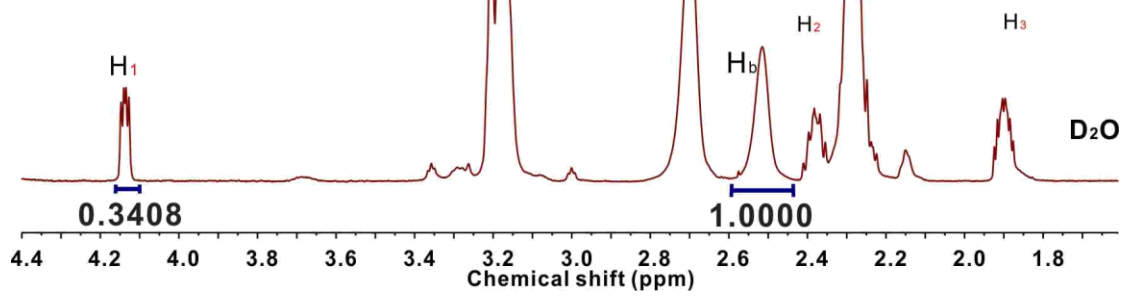

B17-1

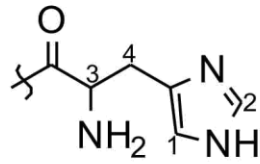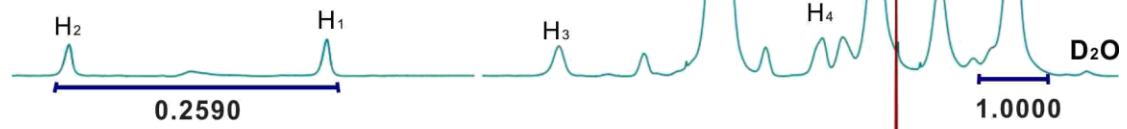

B17-2

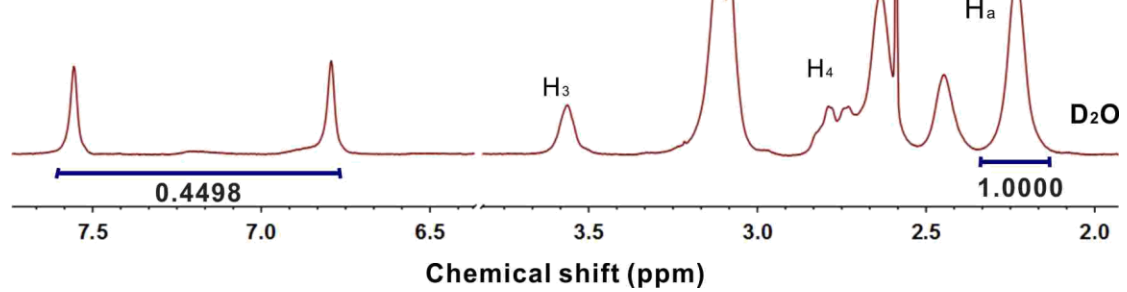

**B18-1**

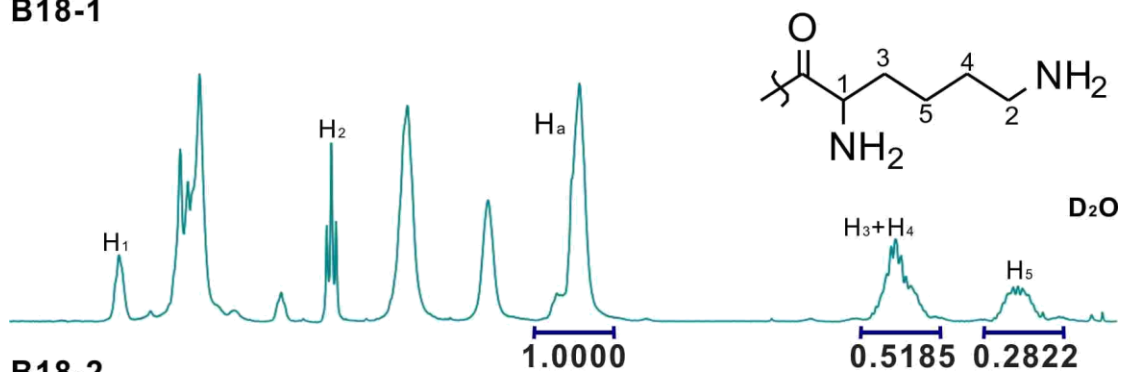

**B18-2**

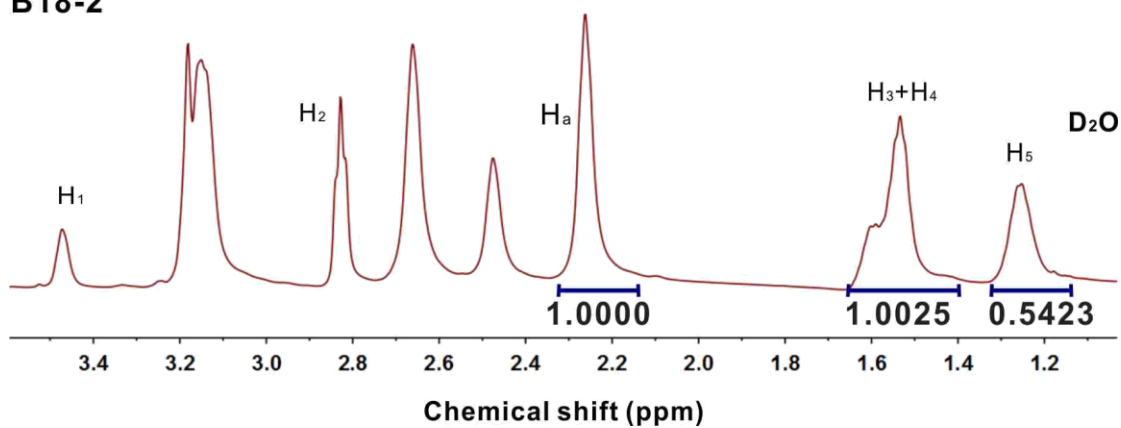

**B19-1**

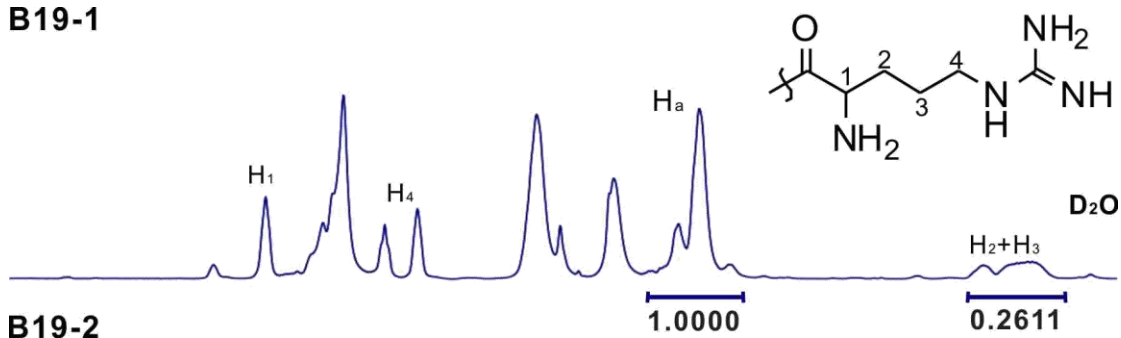

**B19-2**

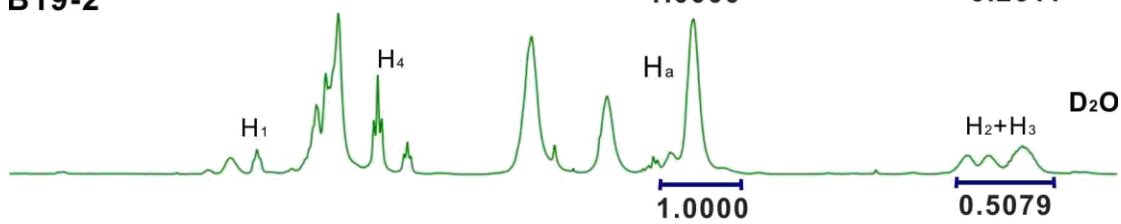

**B19-3**

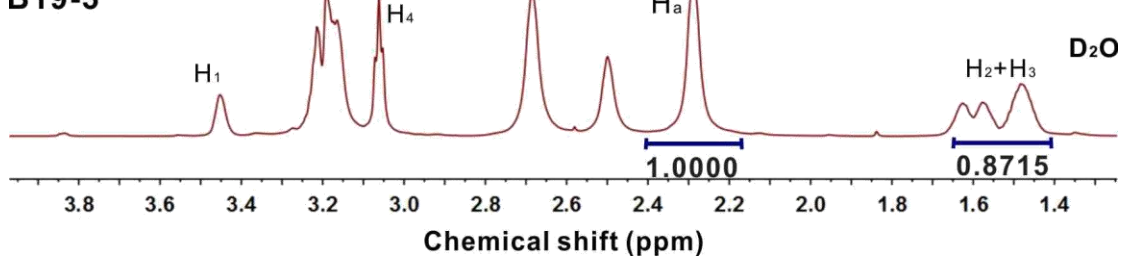



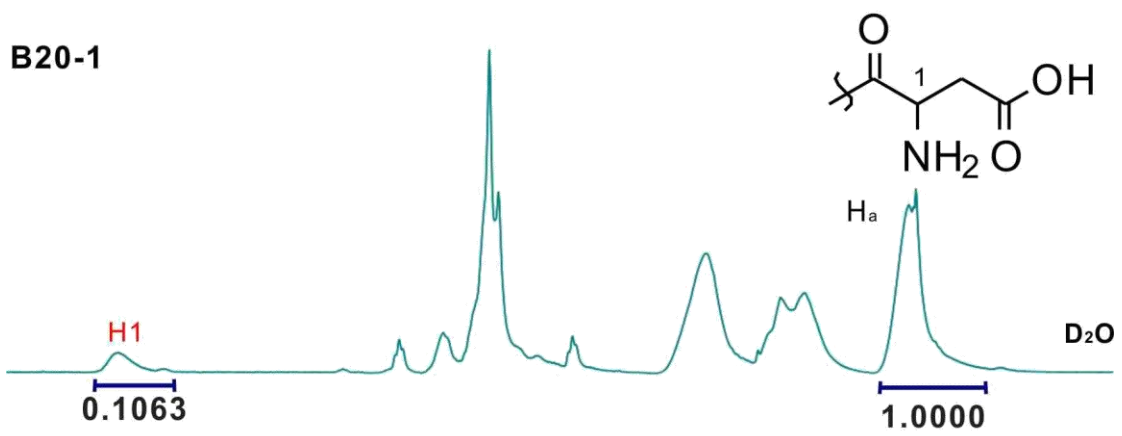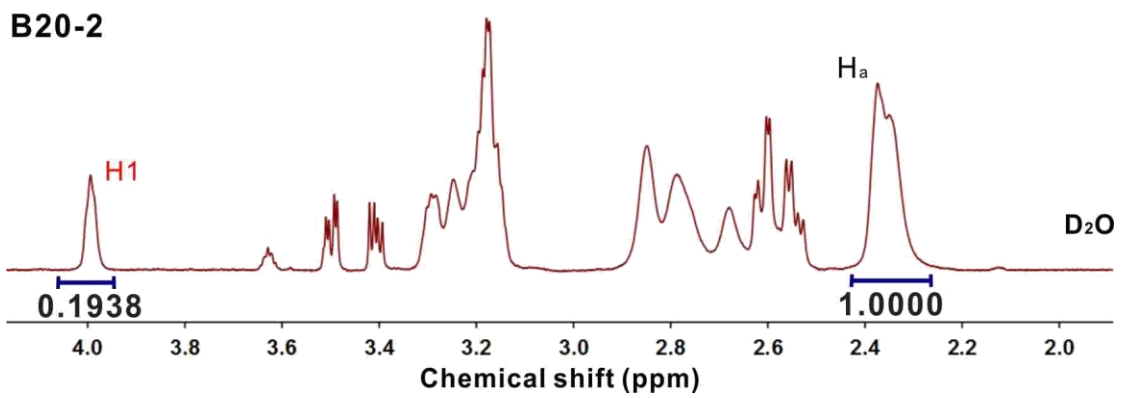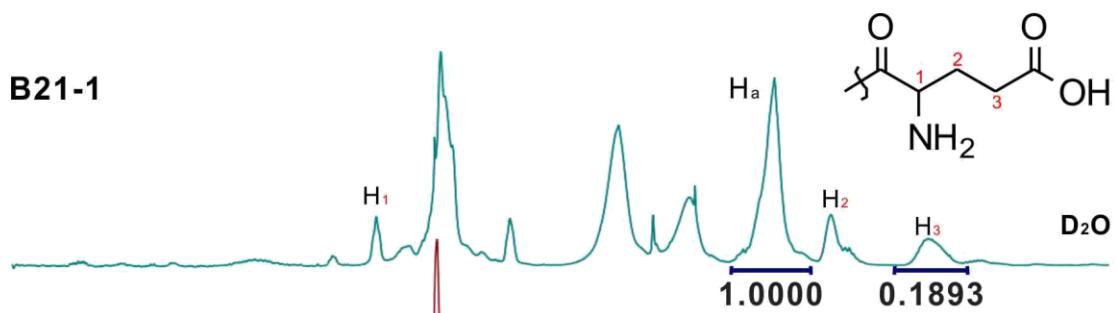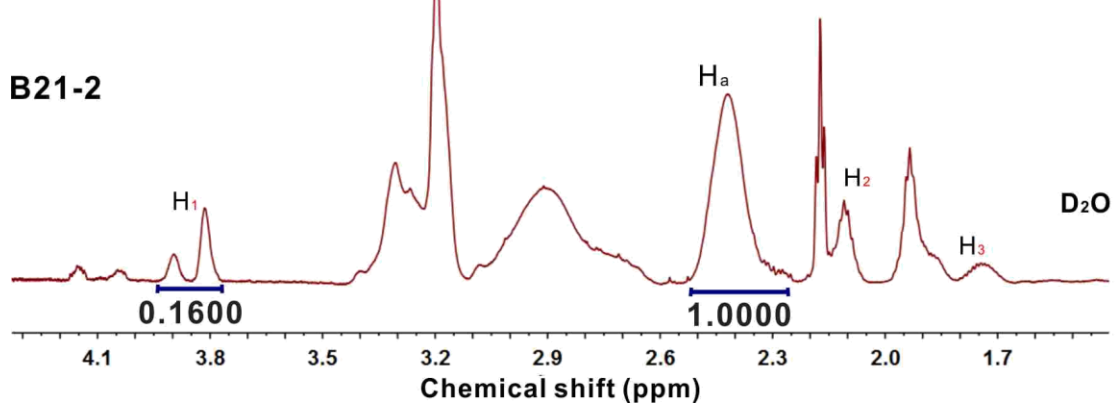

B22-1

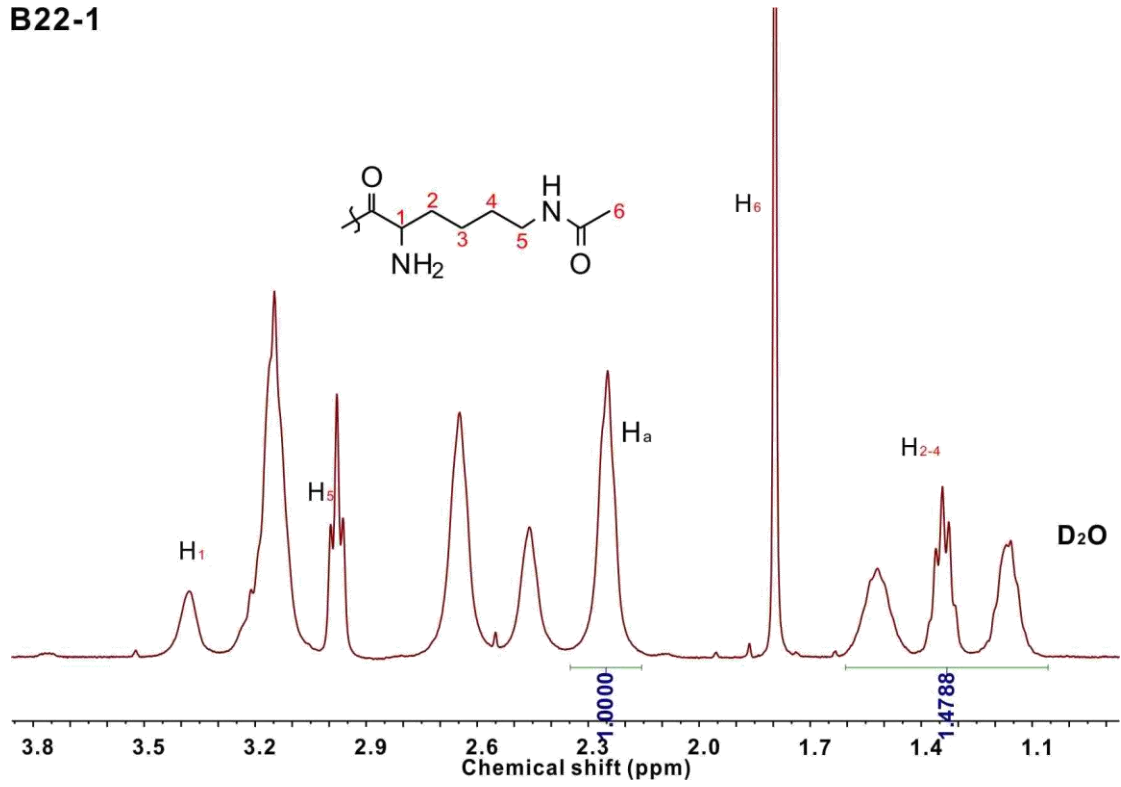

B23-1

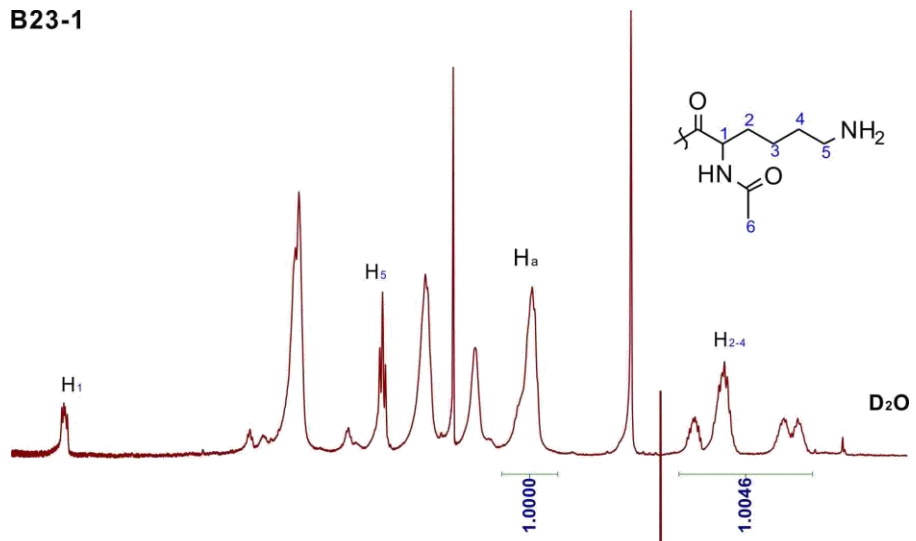

B23-2

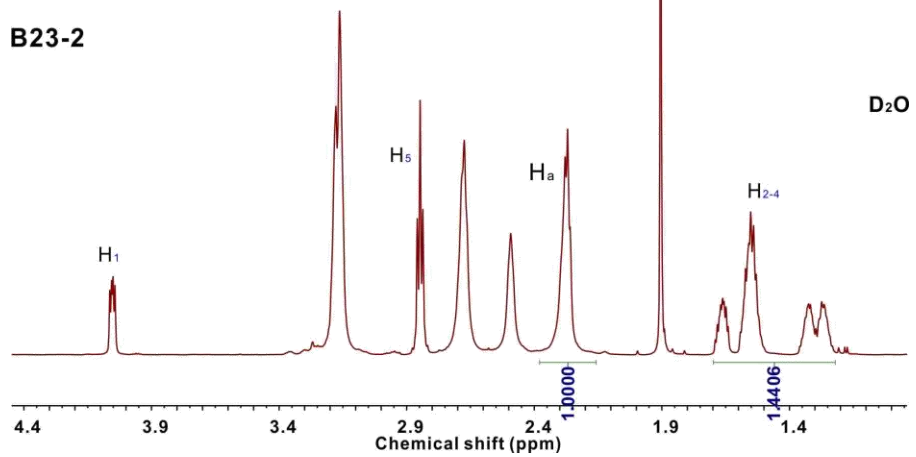

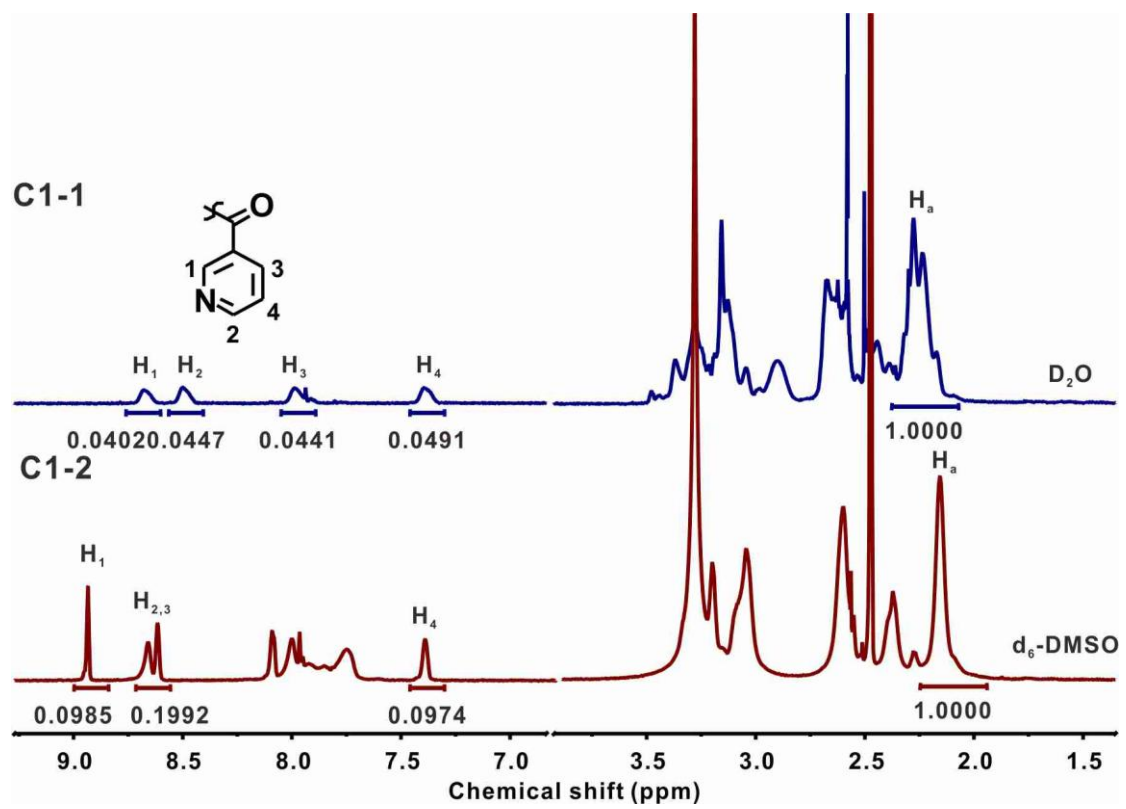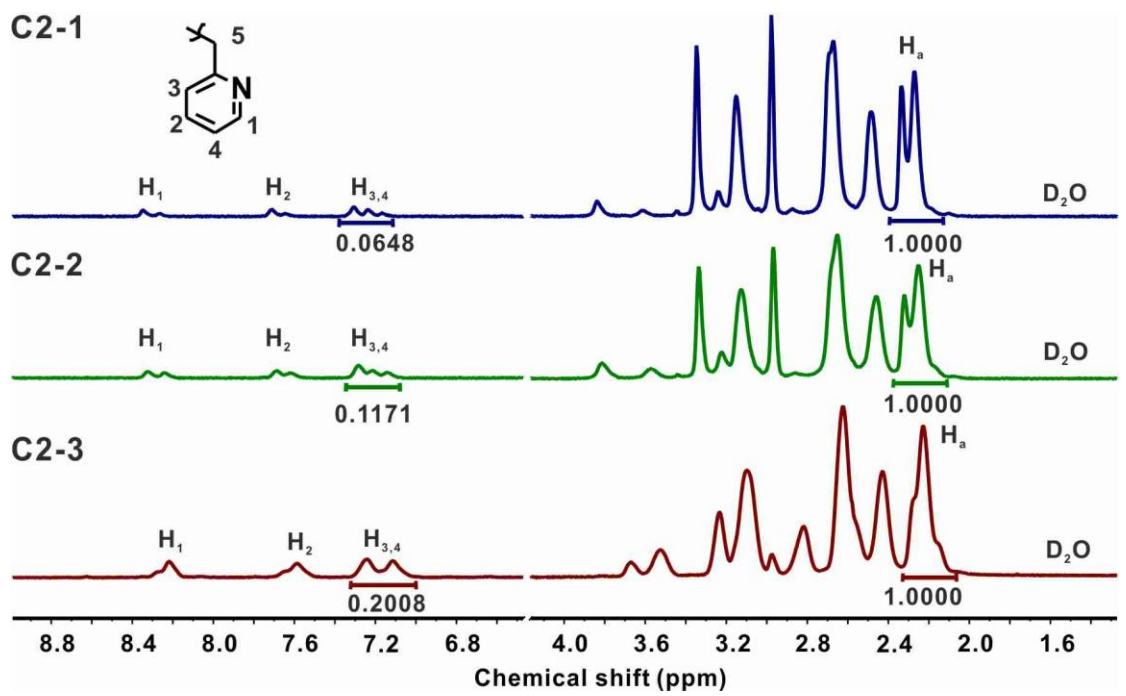

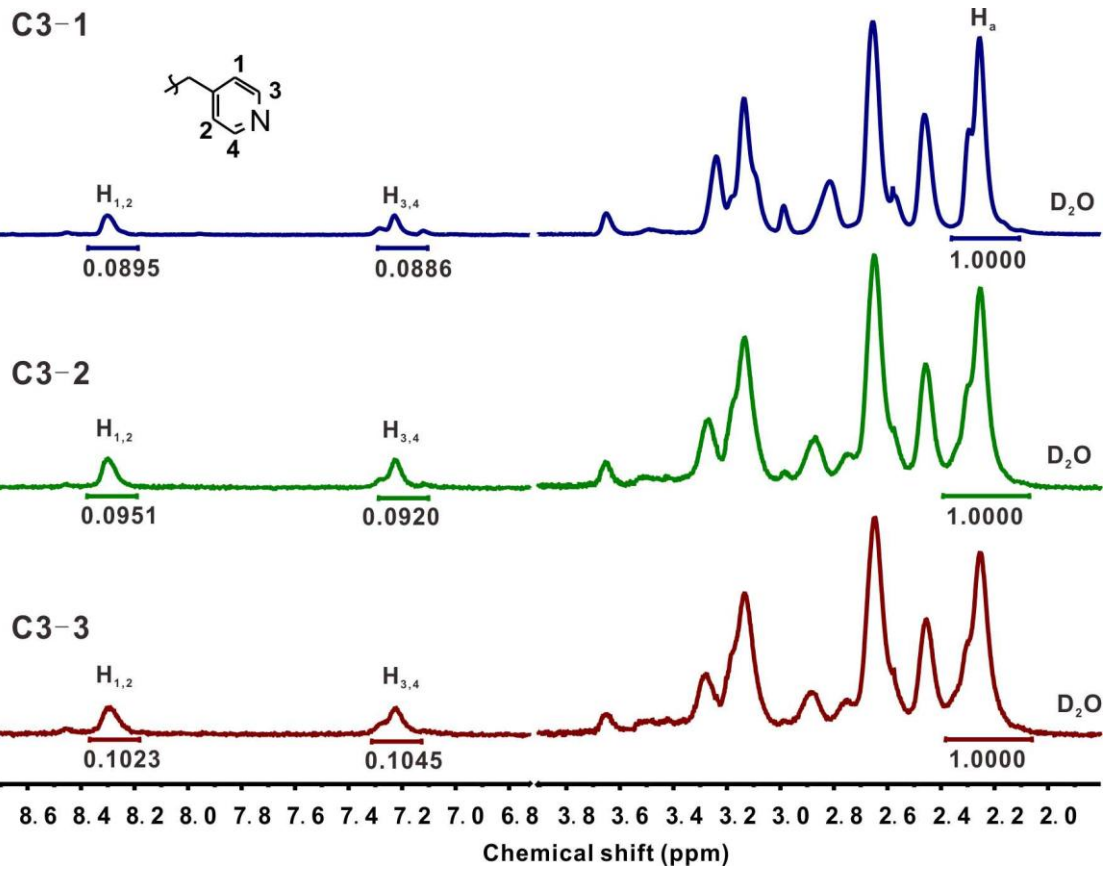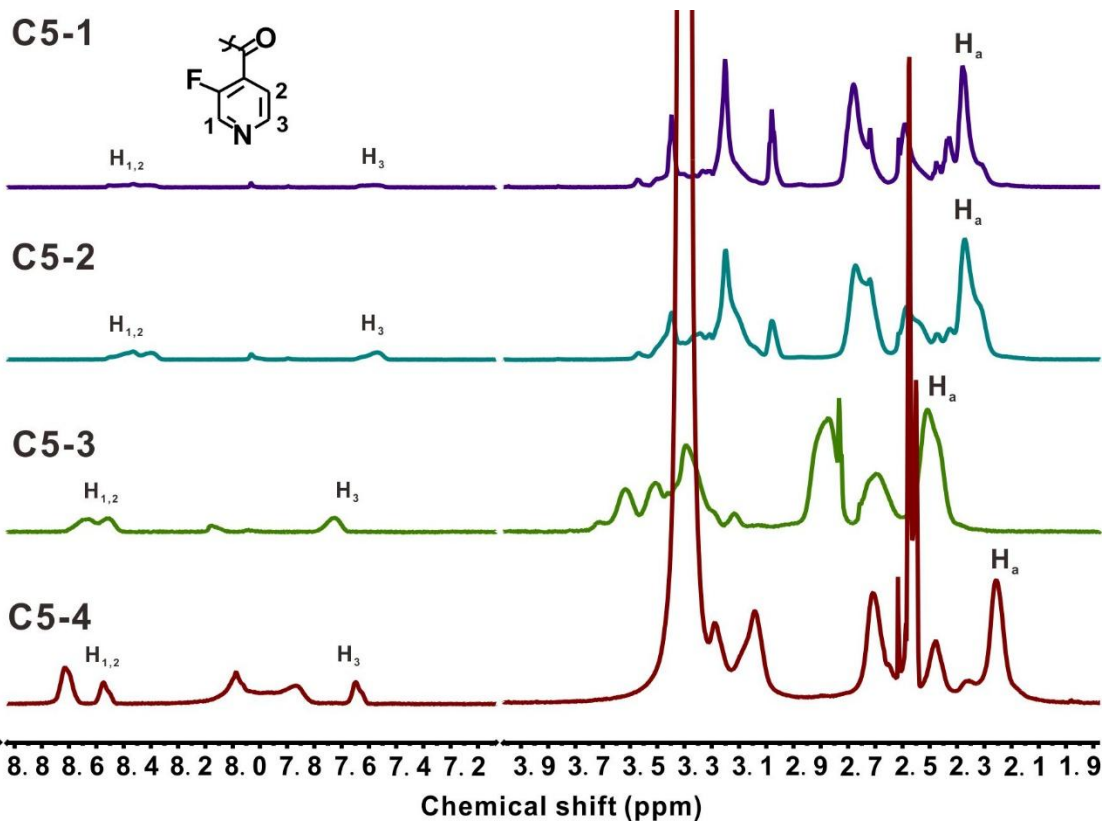

C7-1

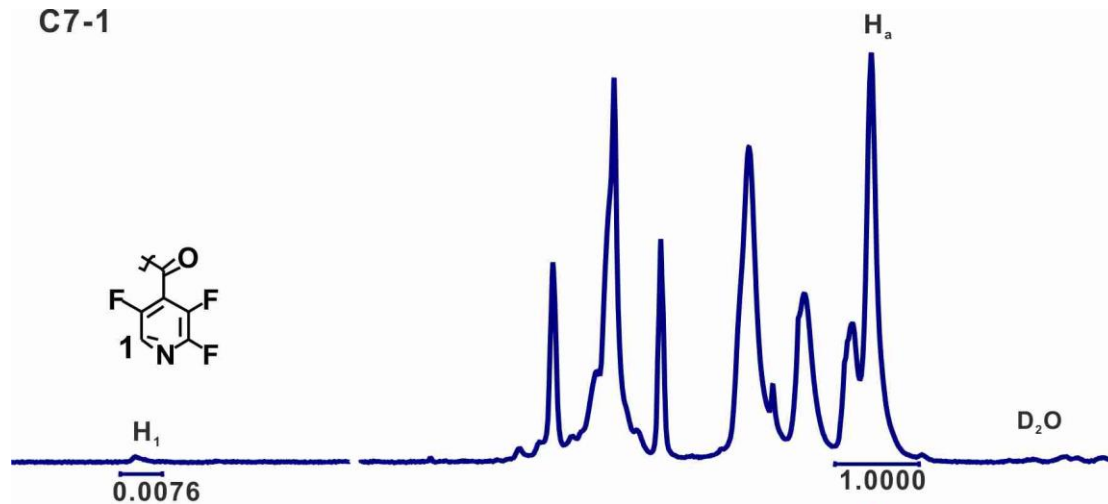

C7-2

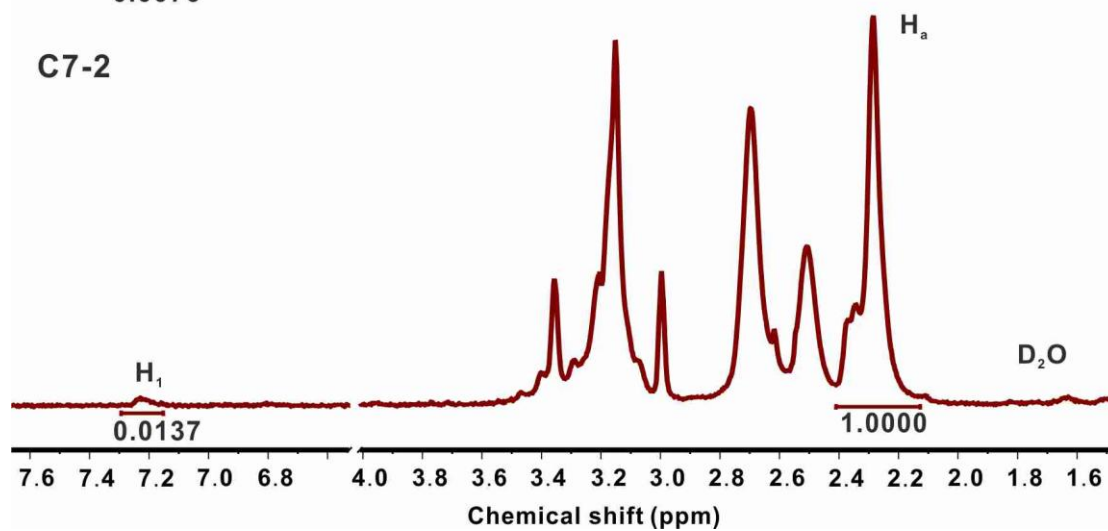

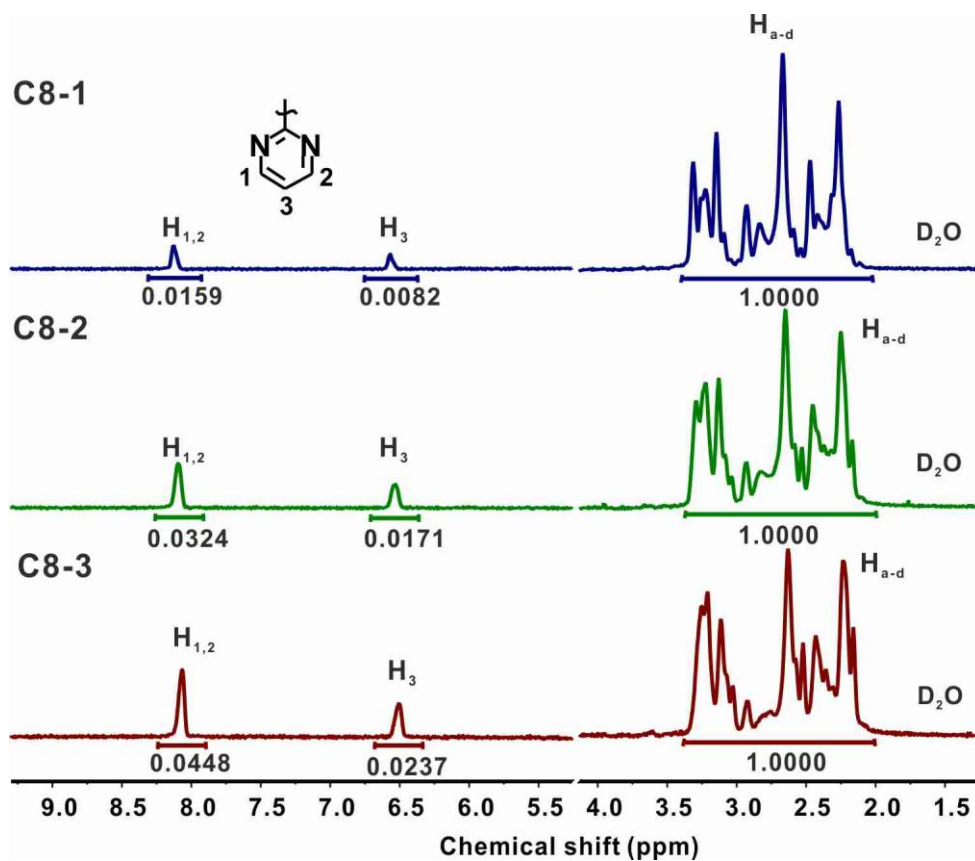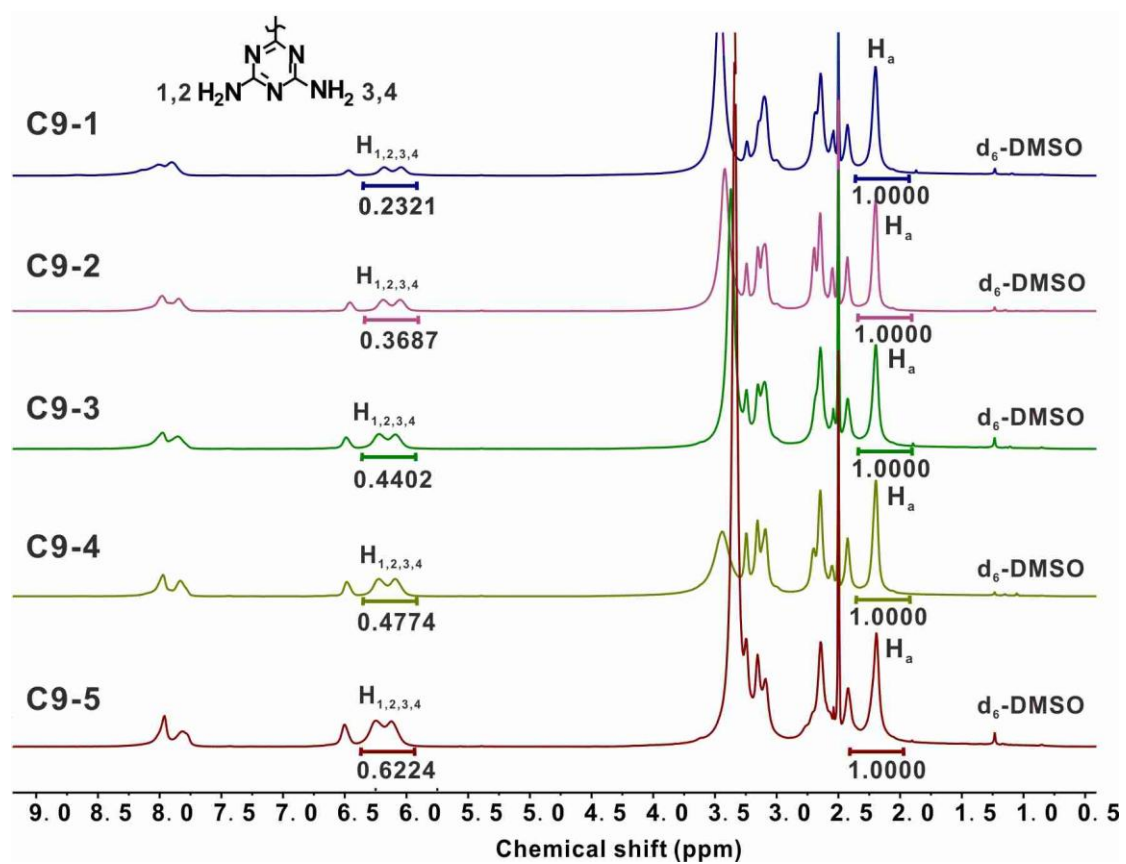

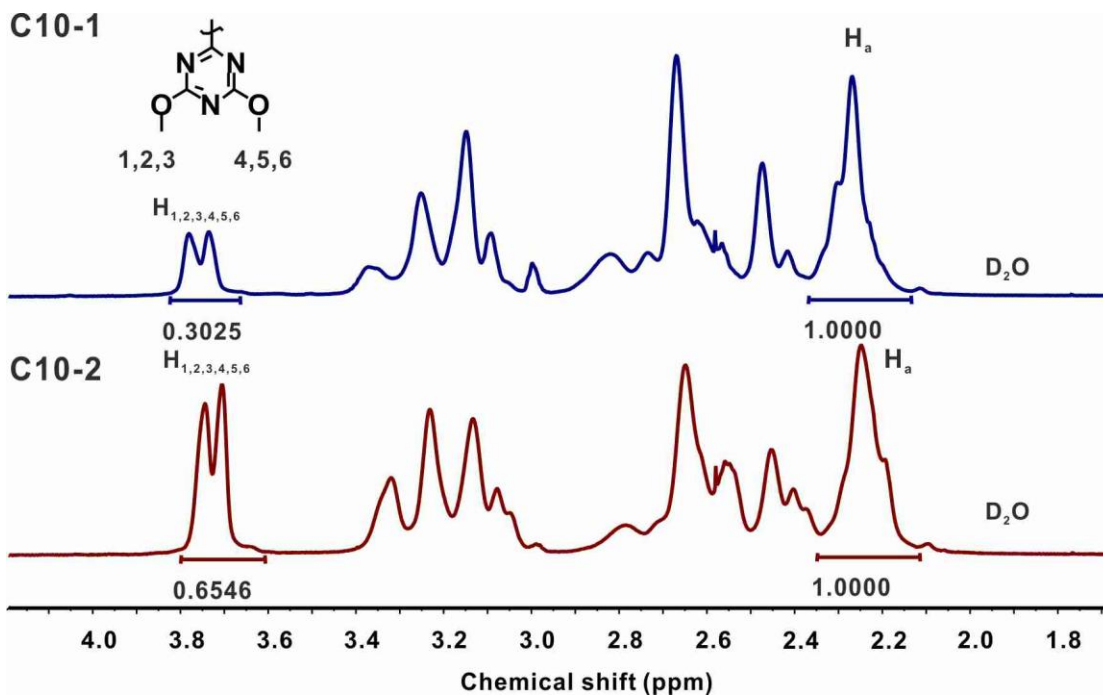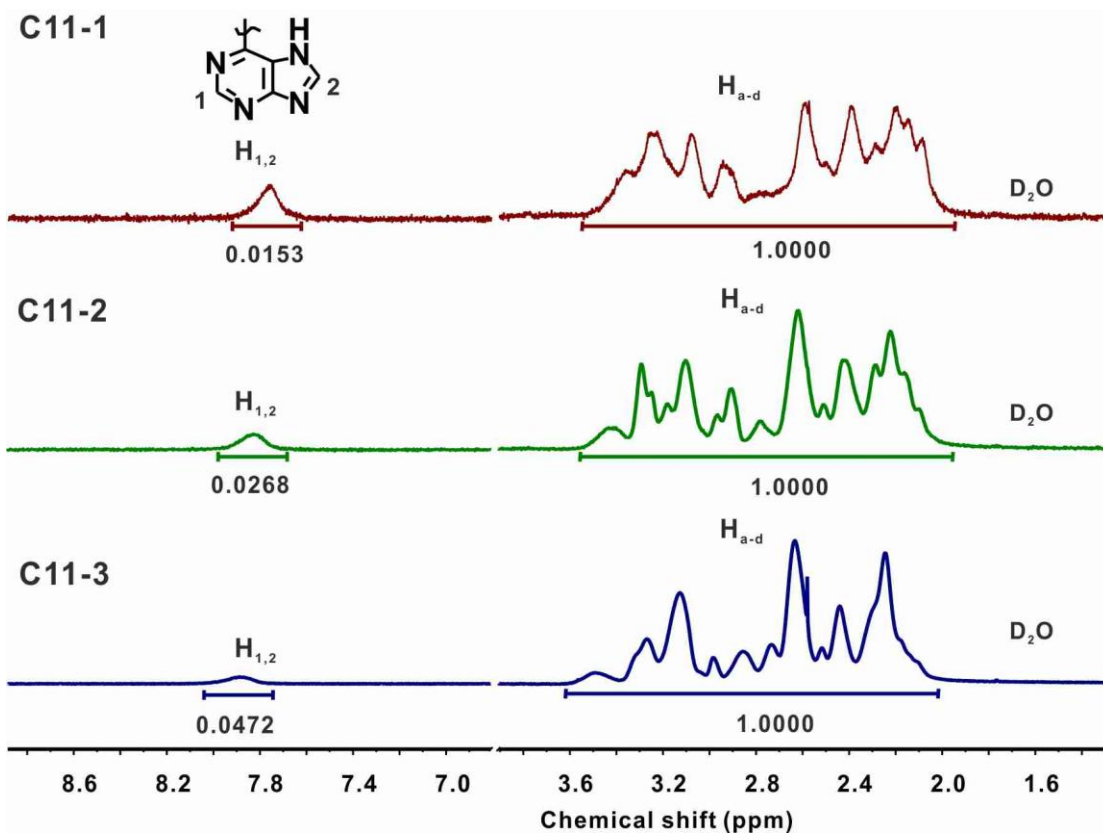



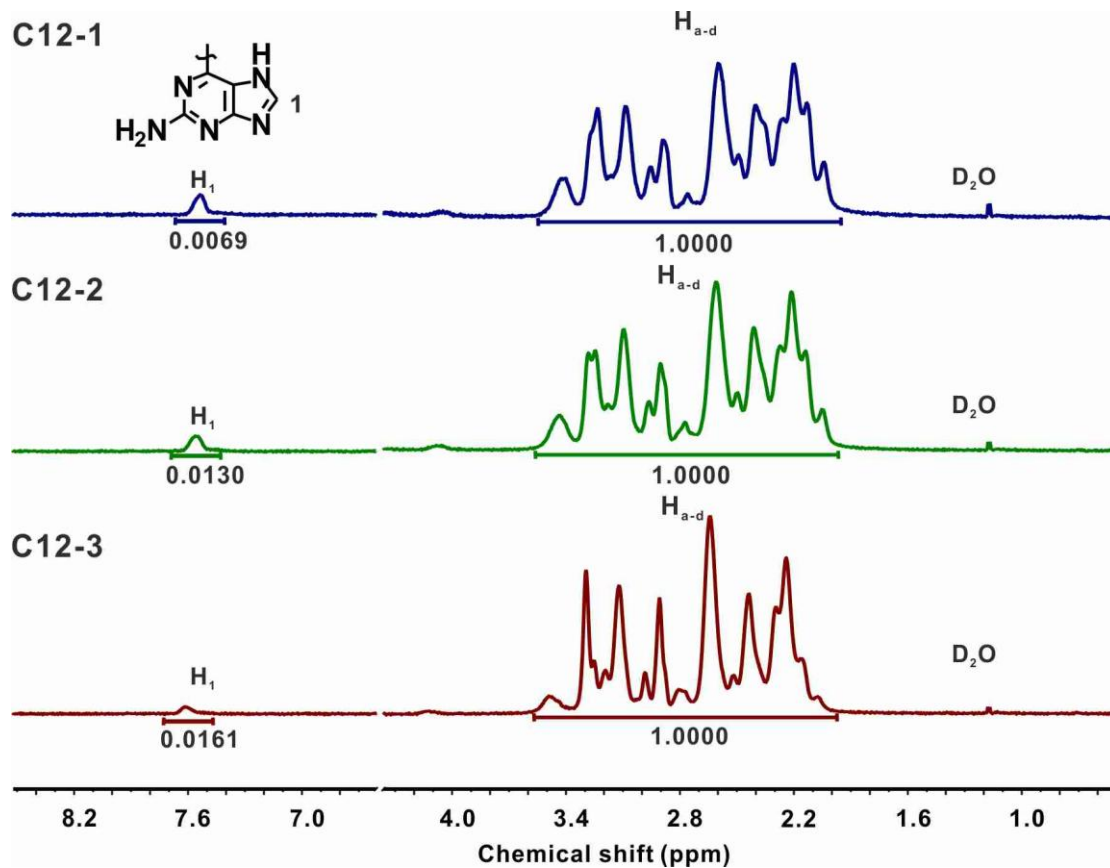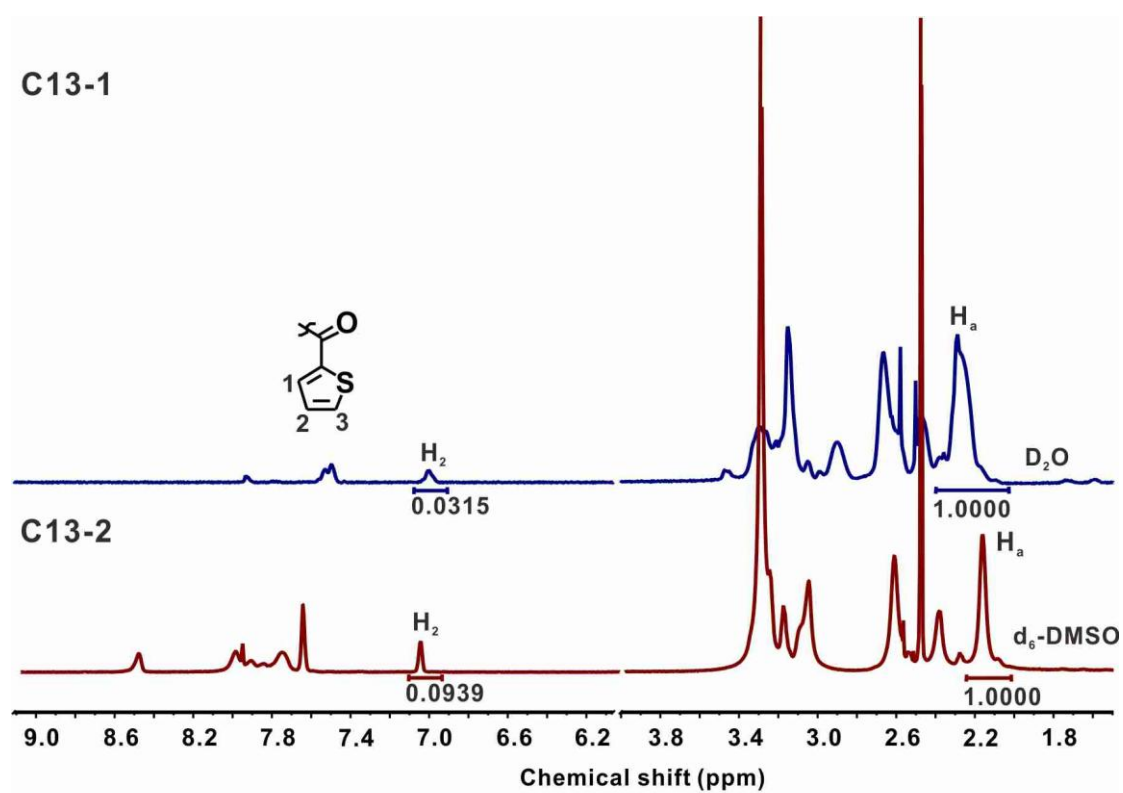



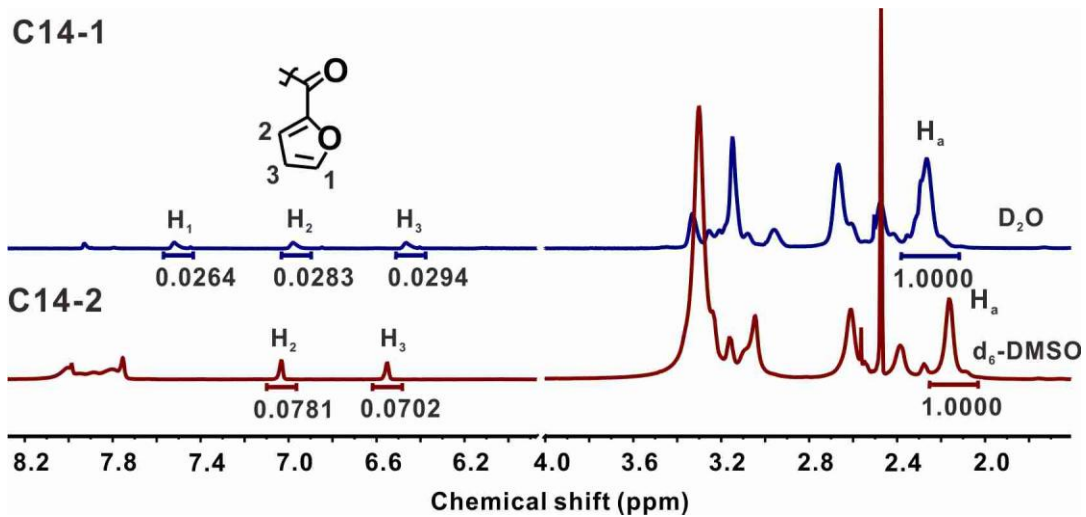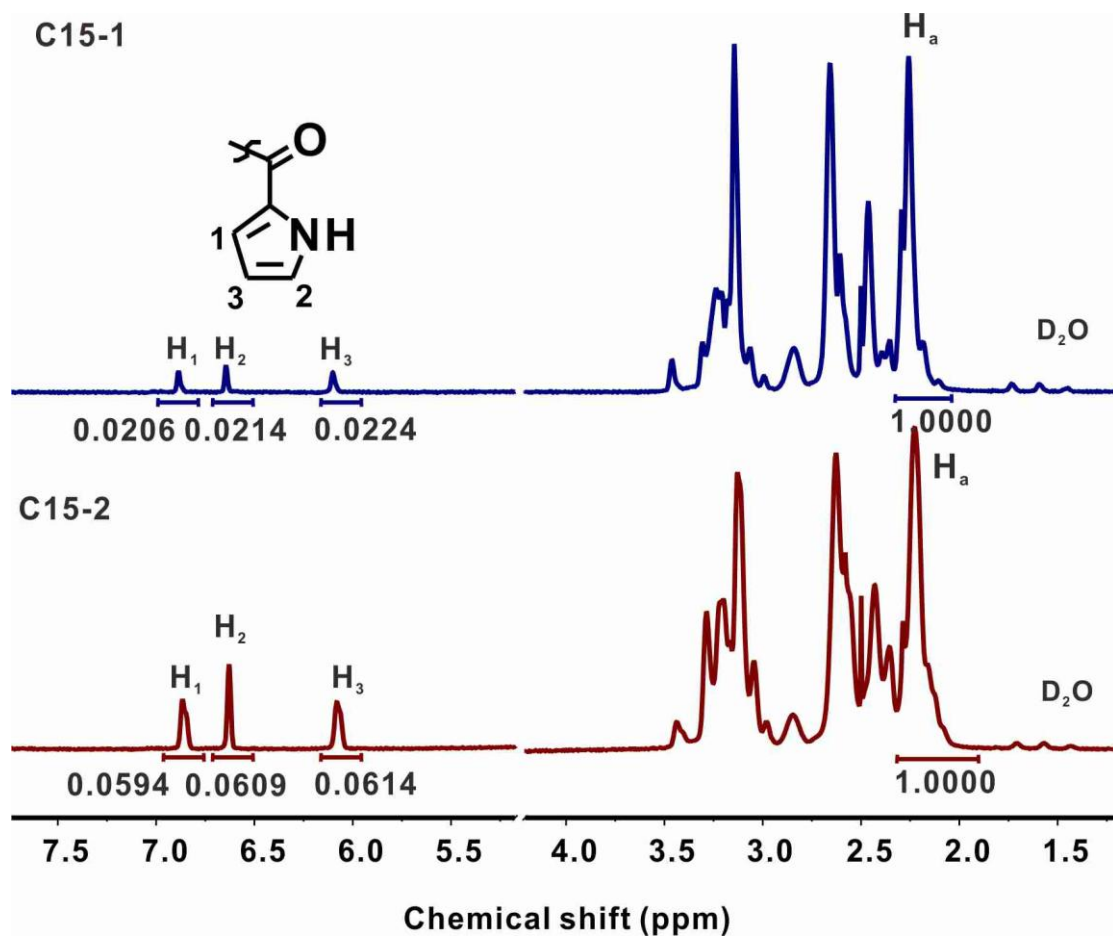

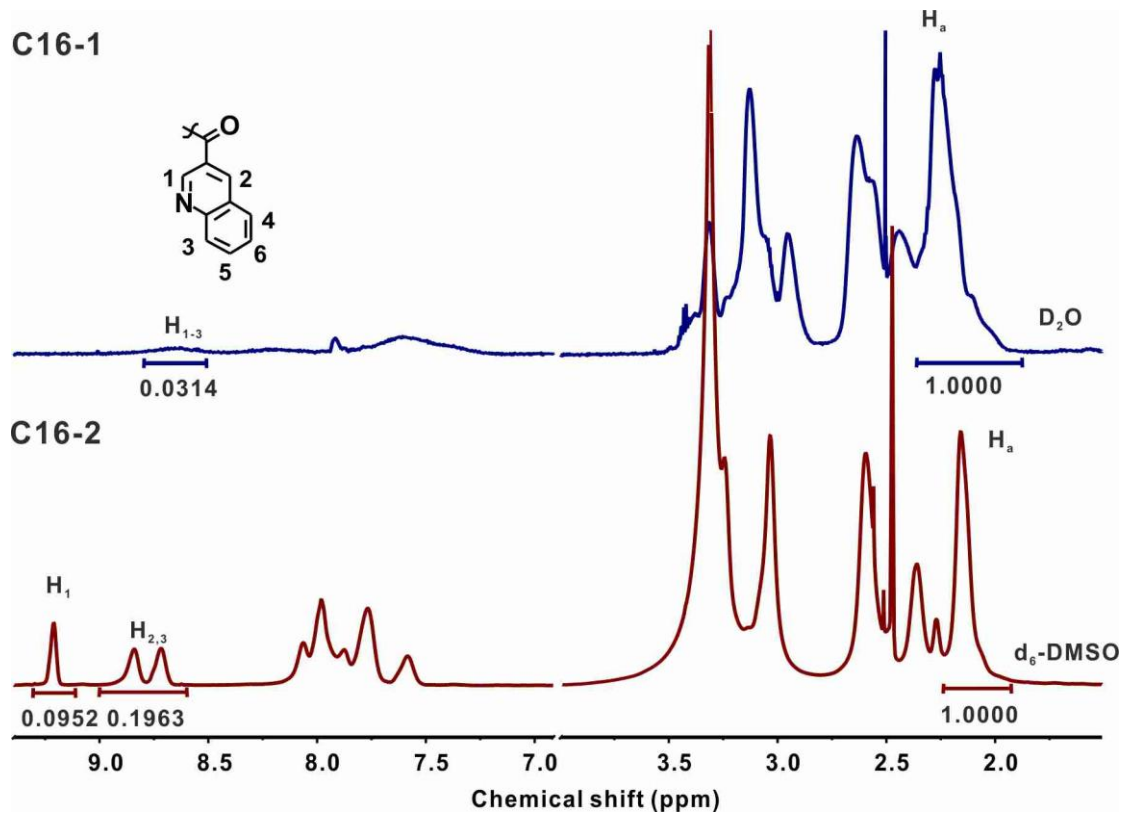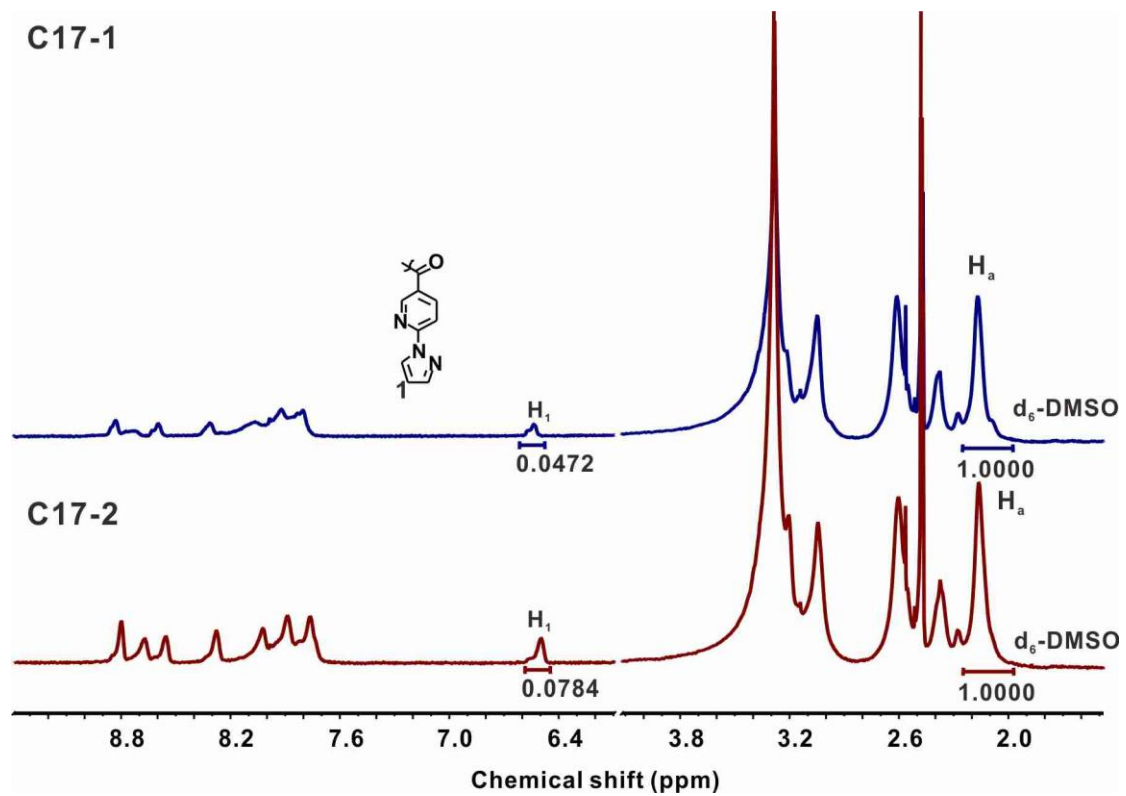

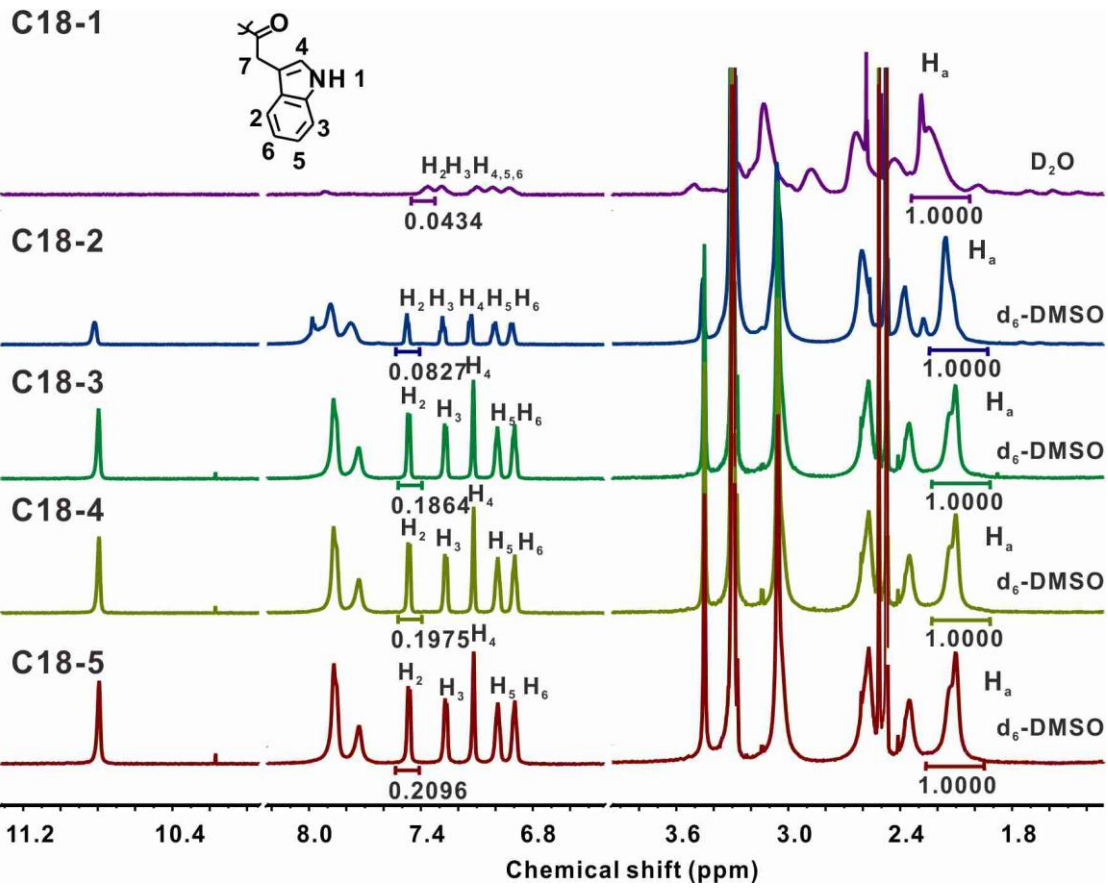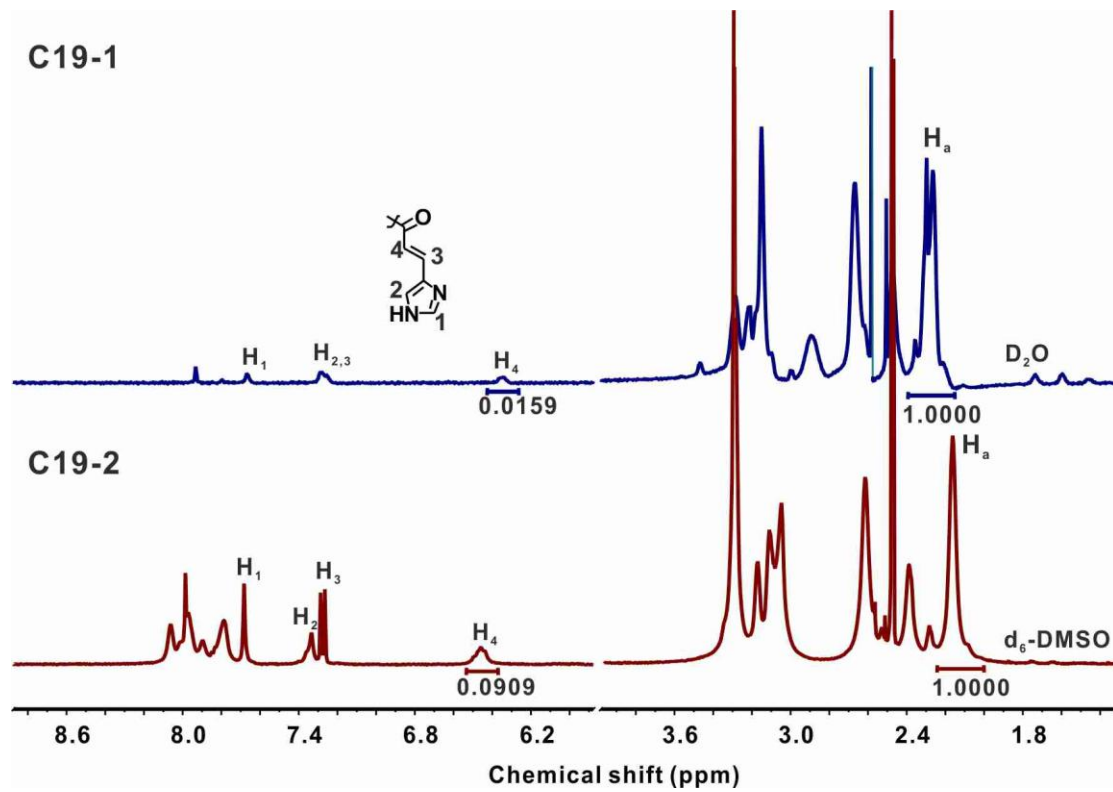

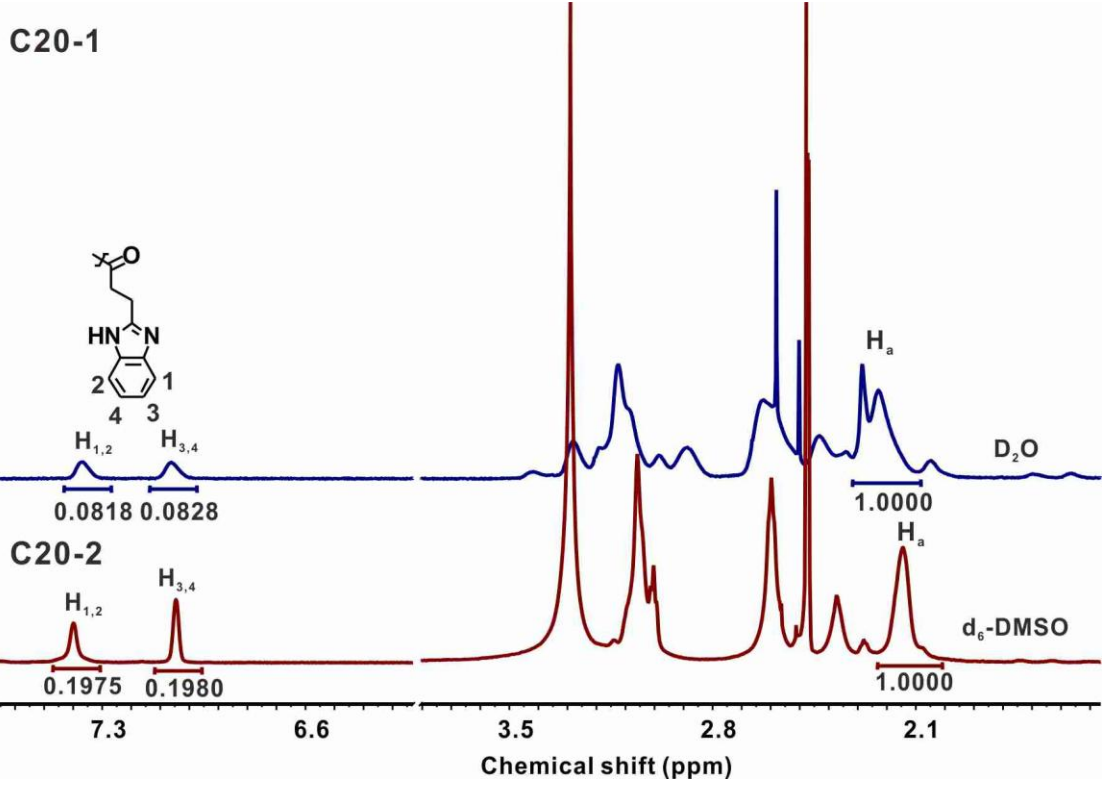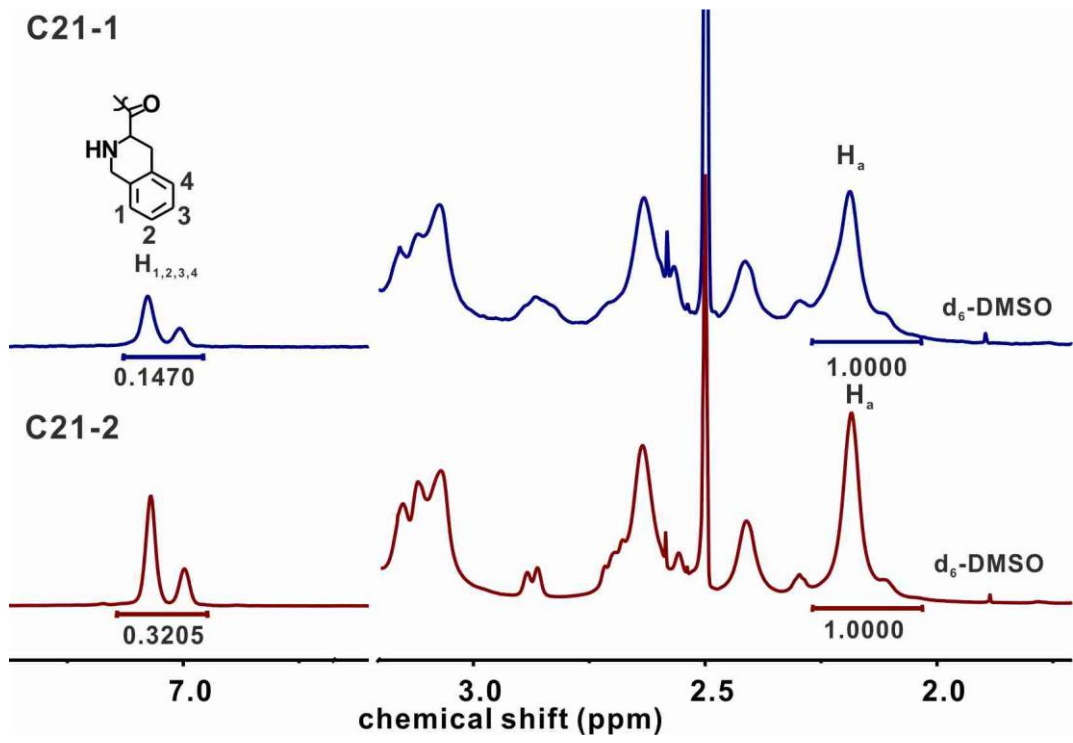

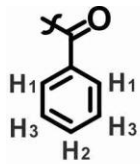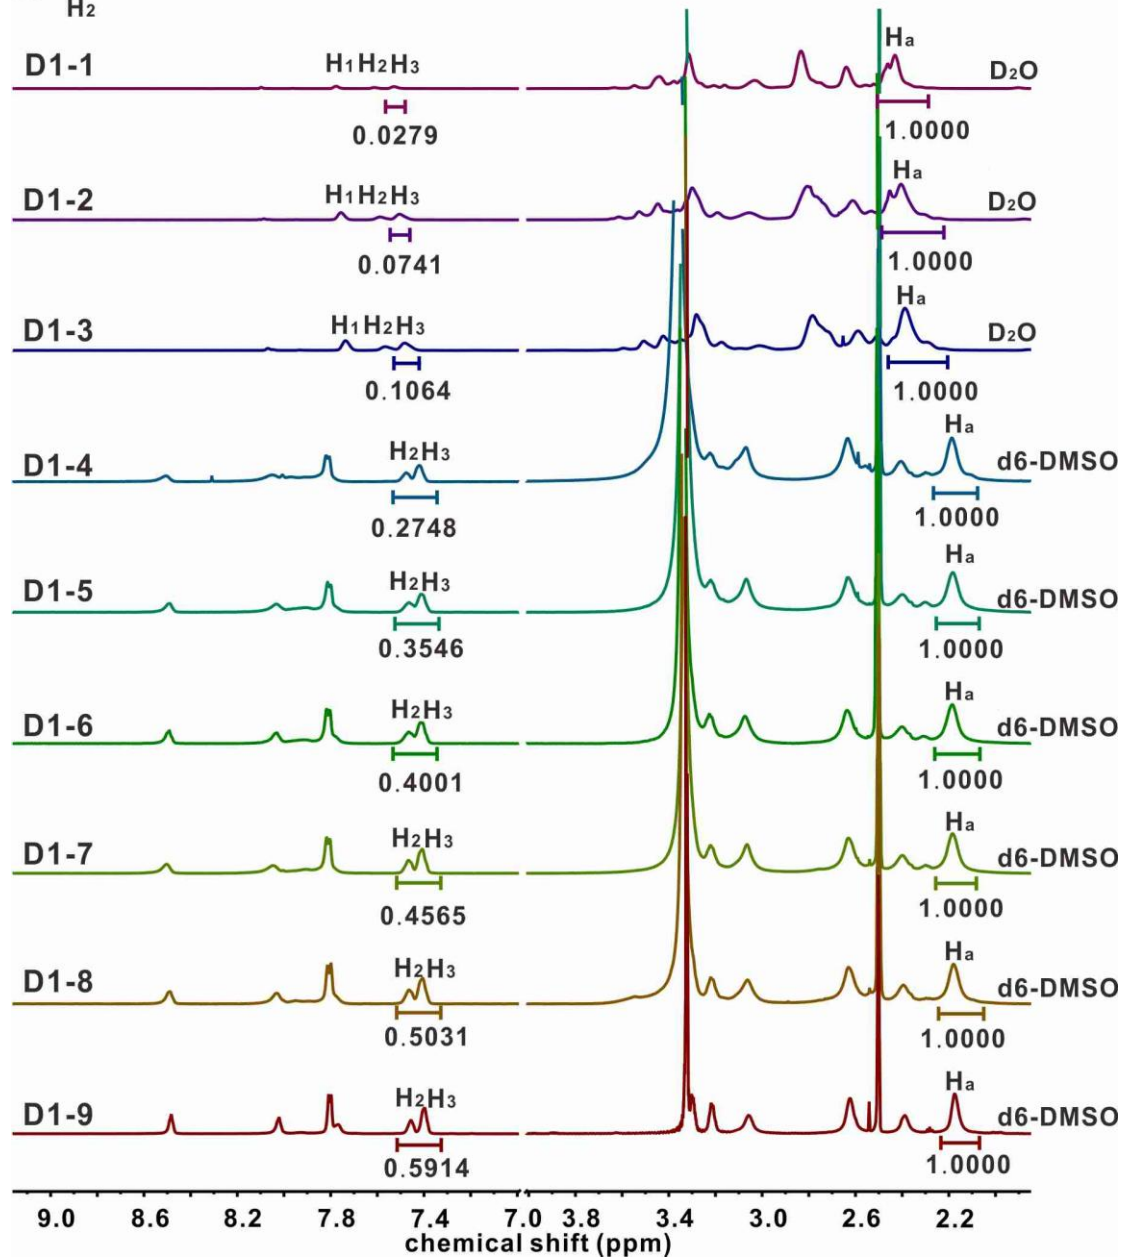

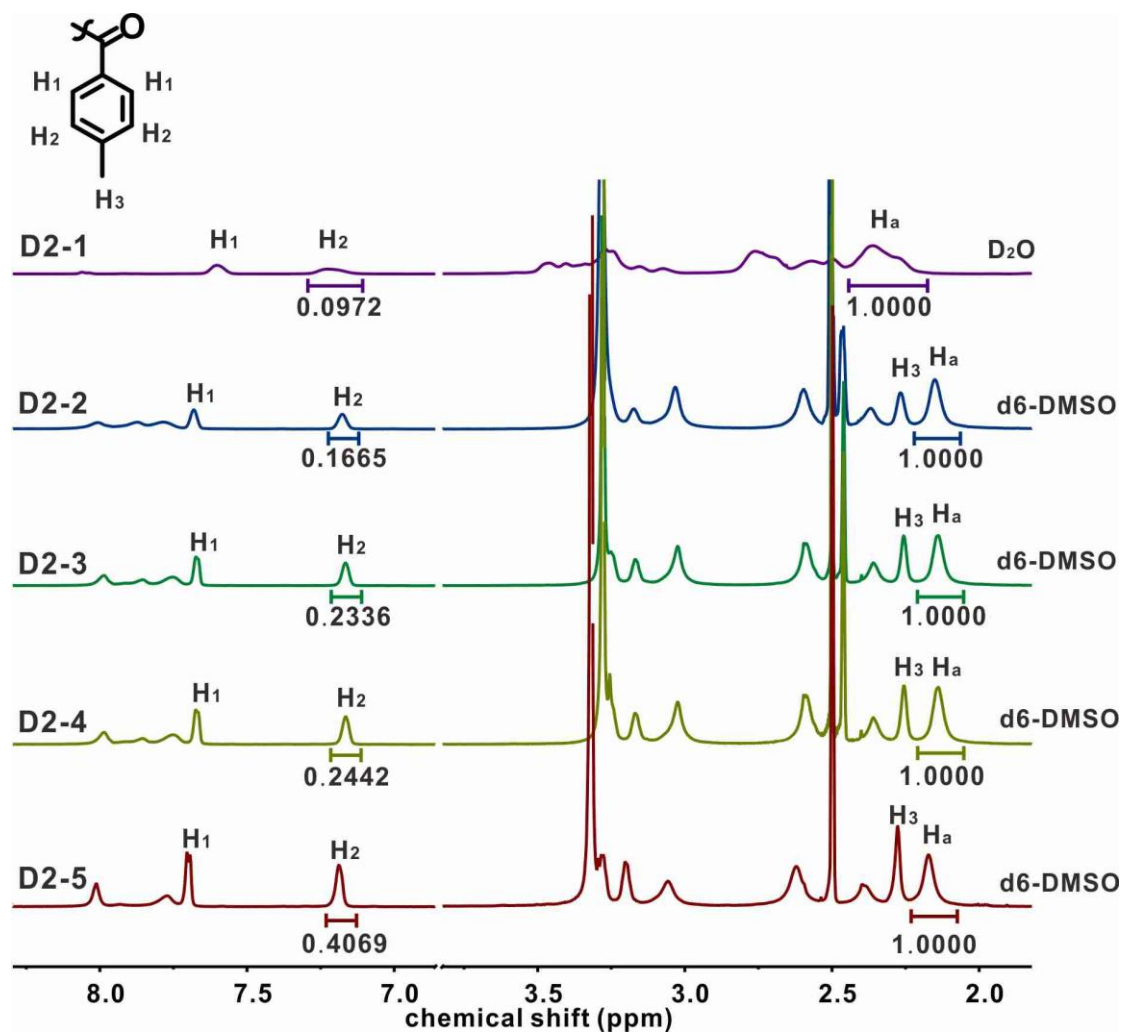



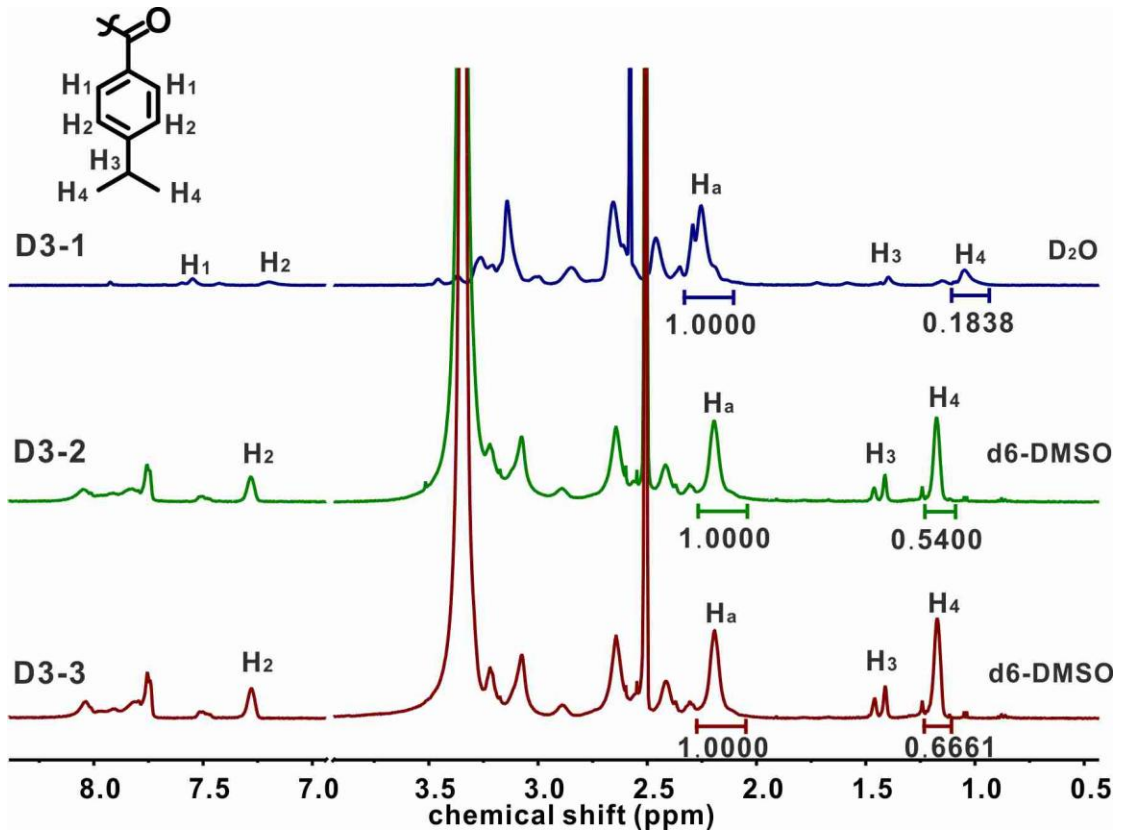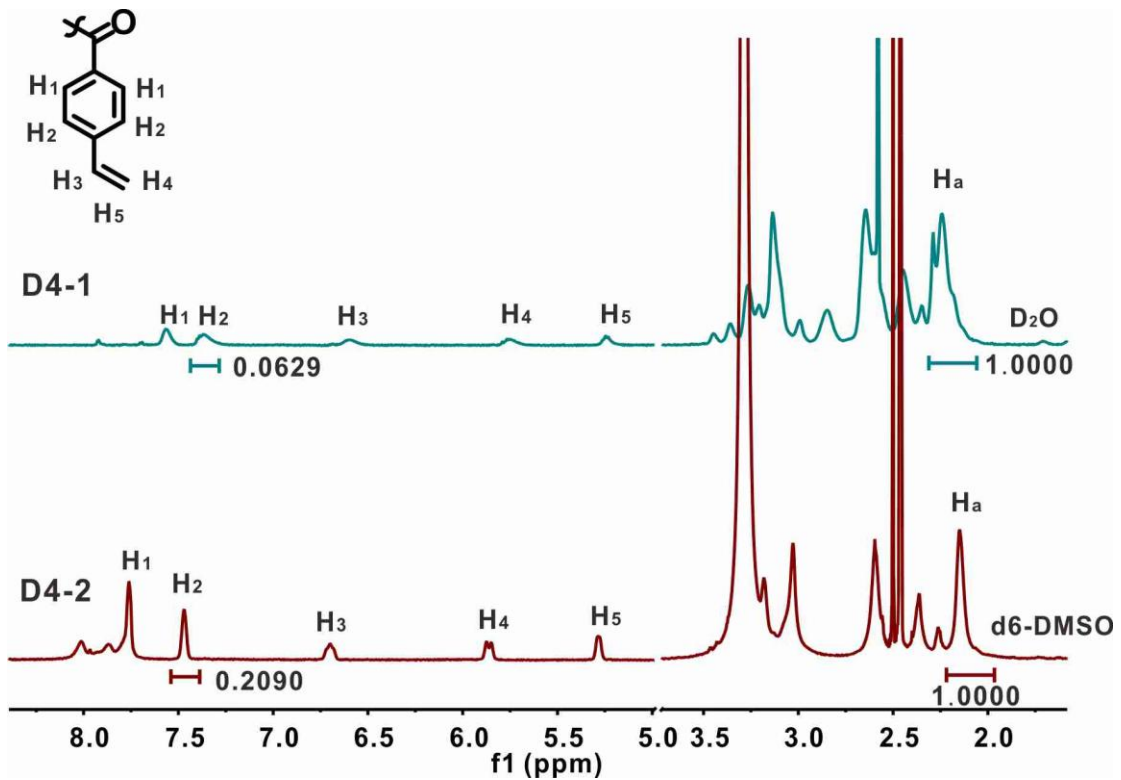

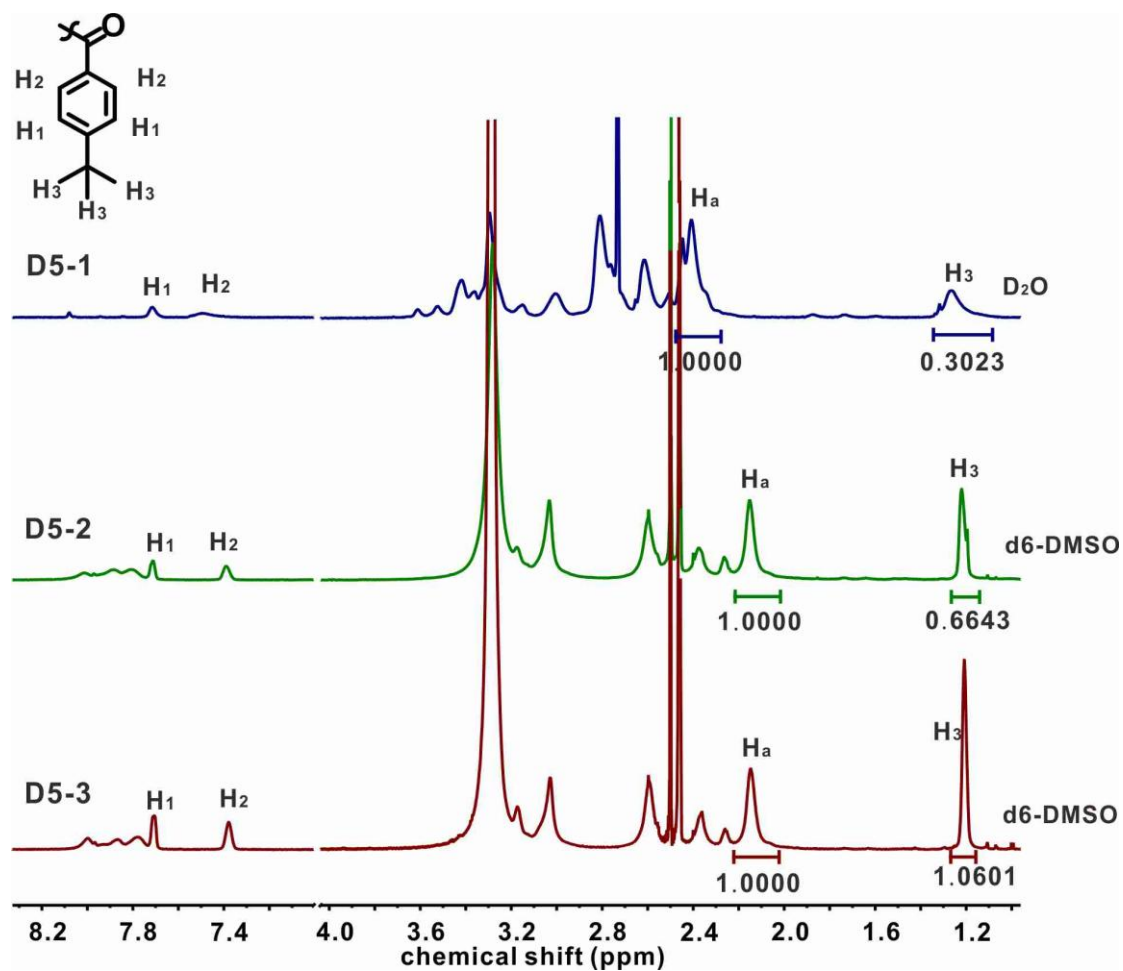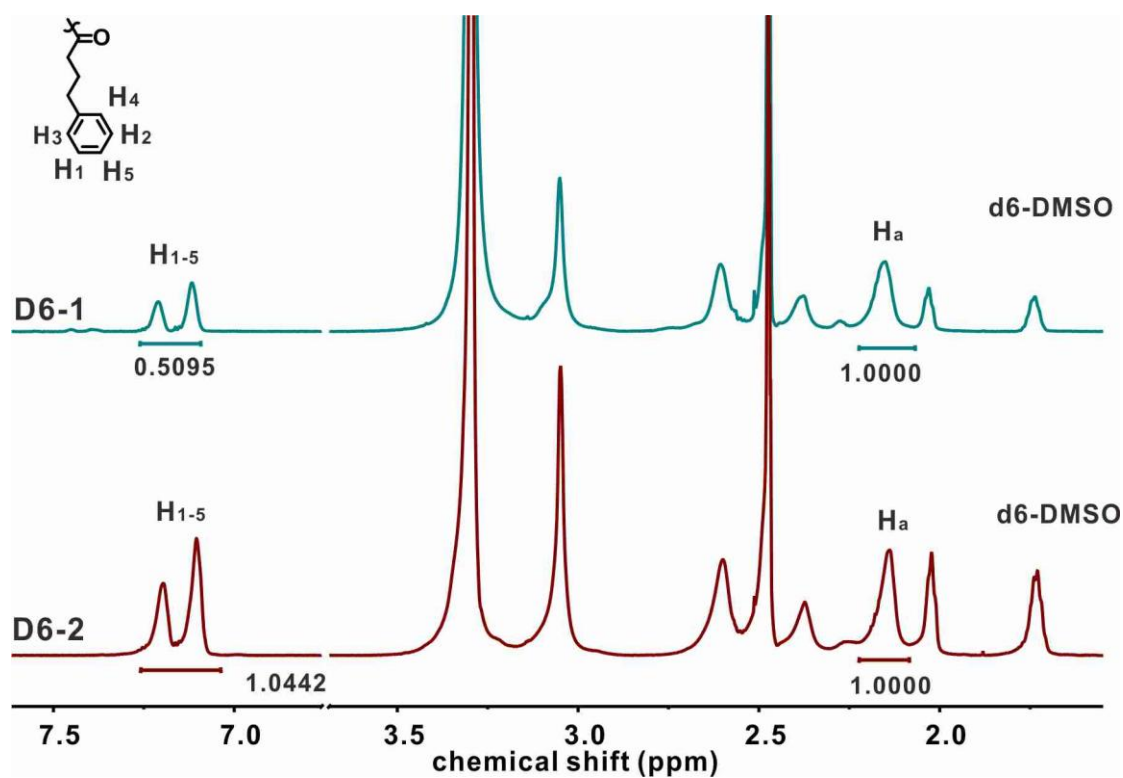



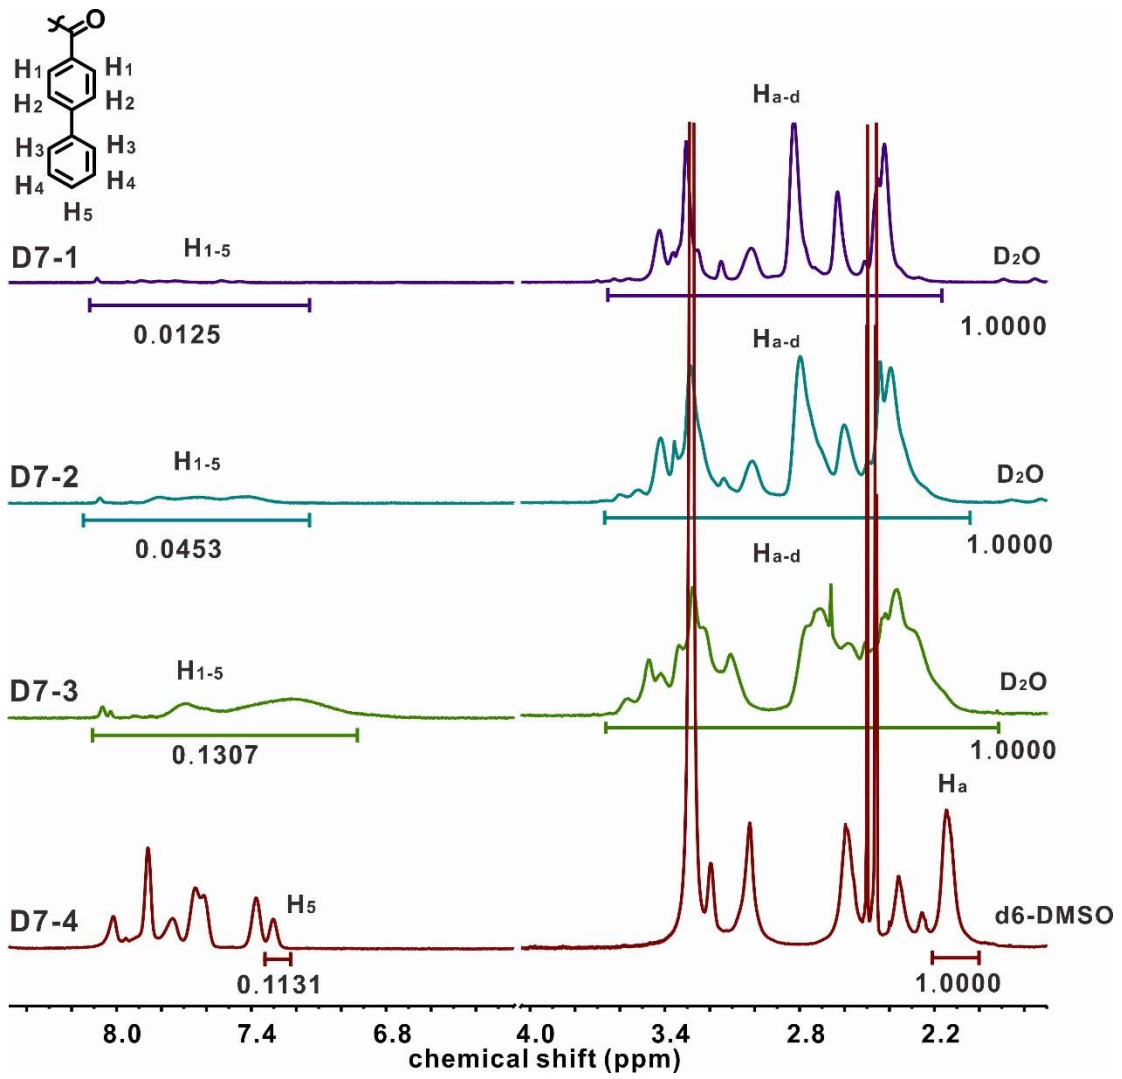

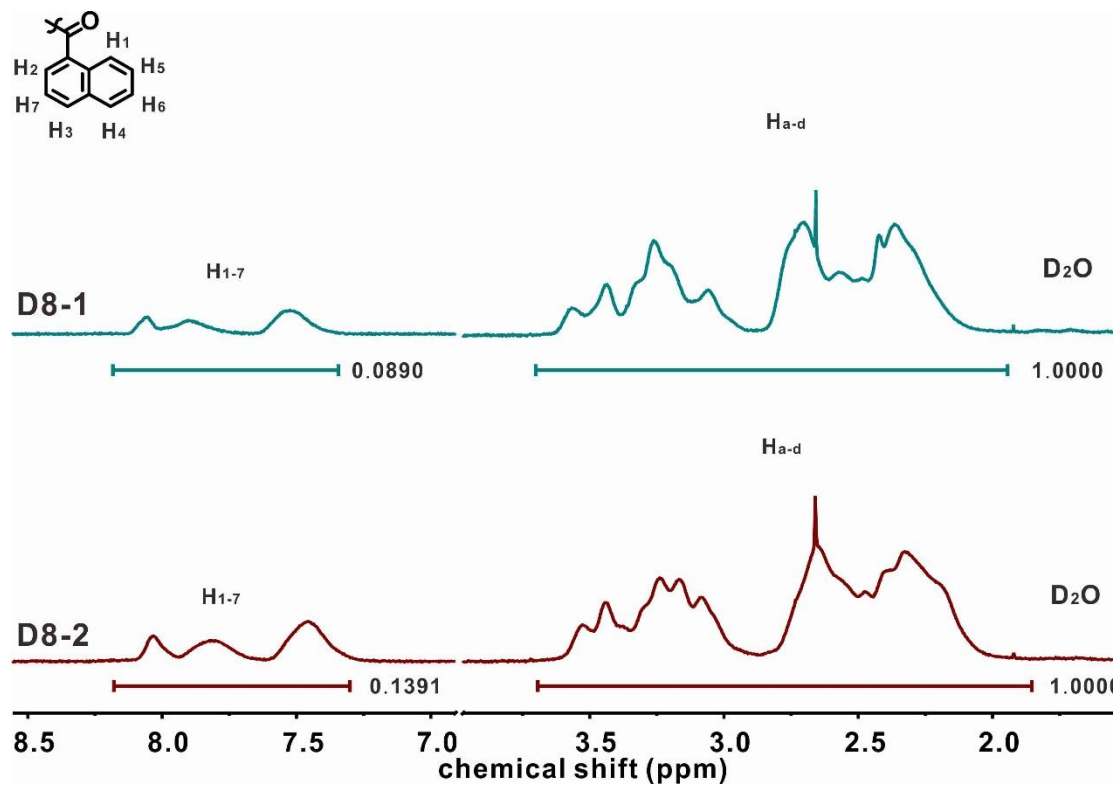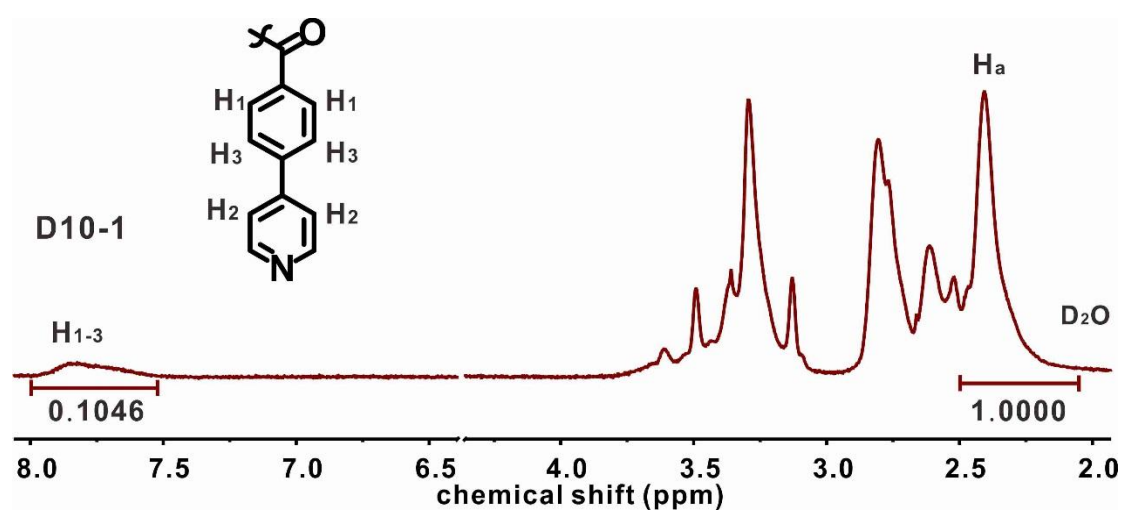

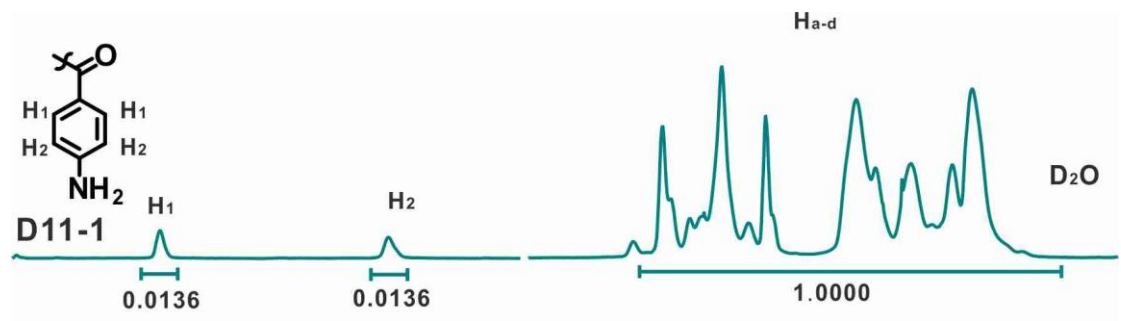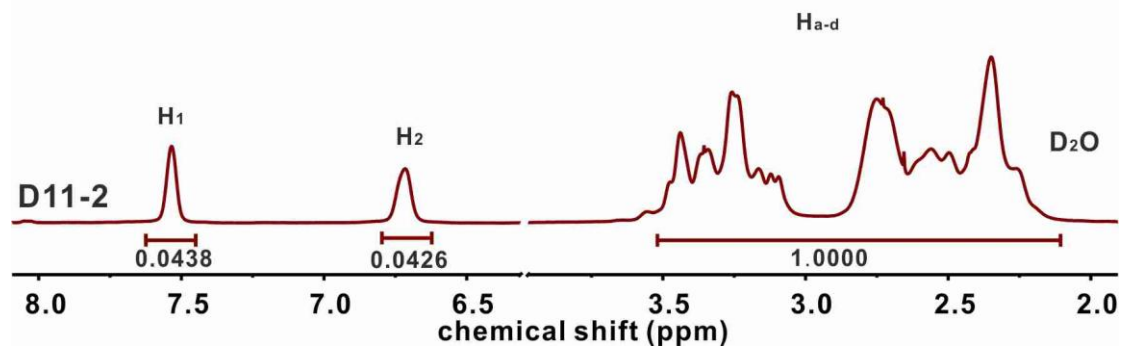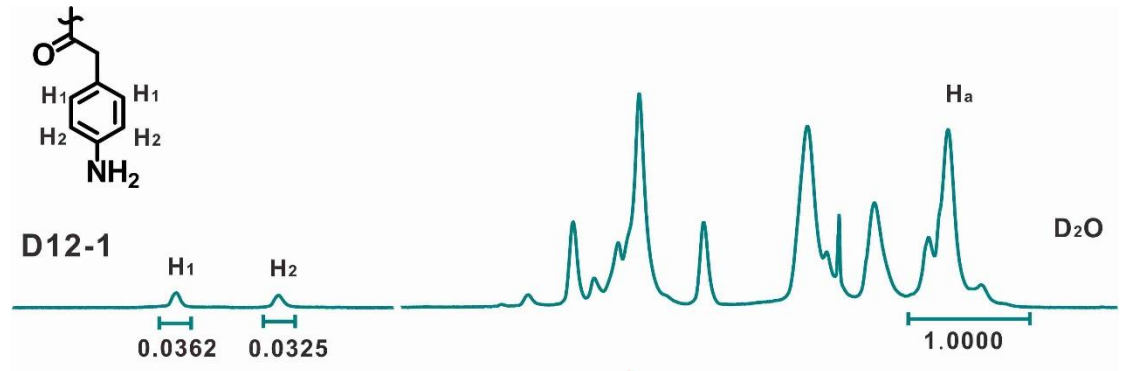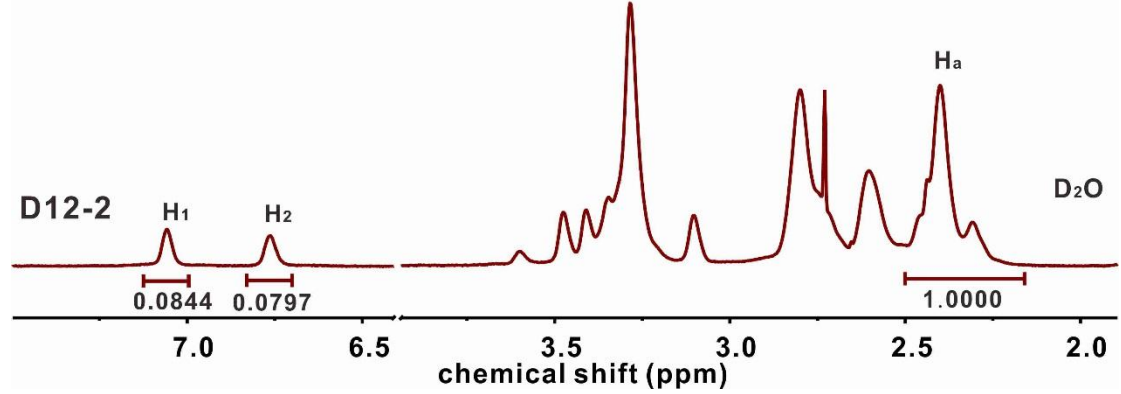

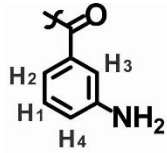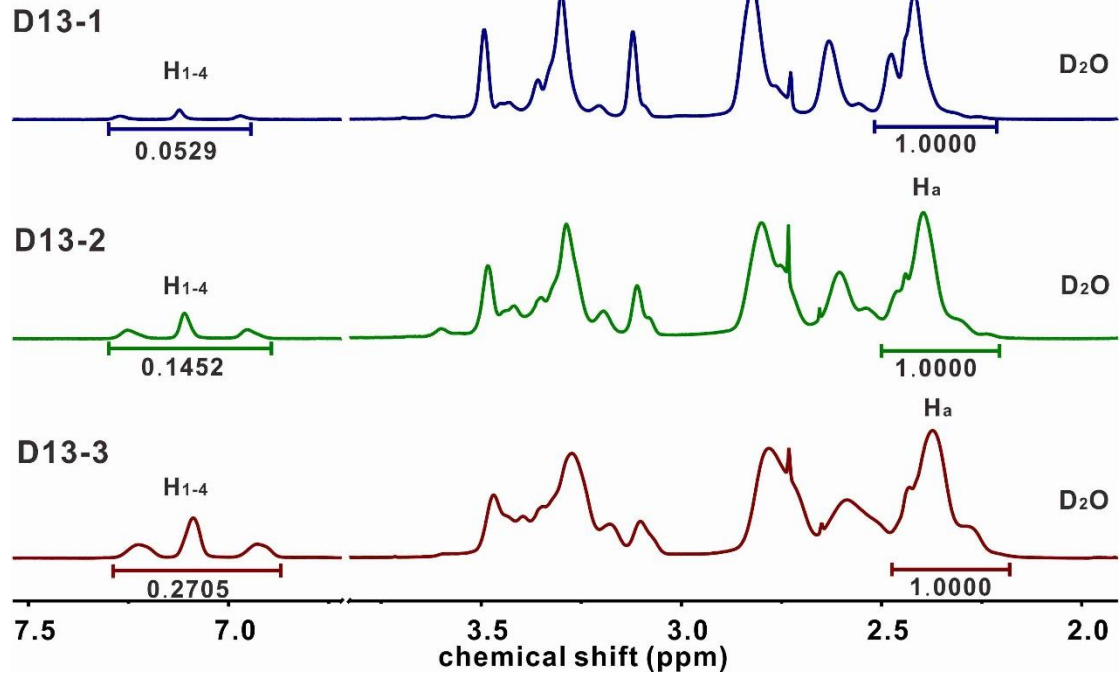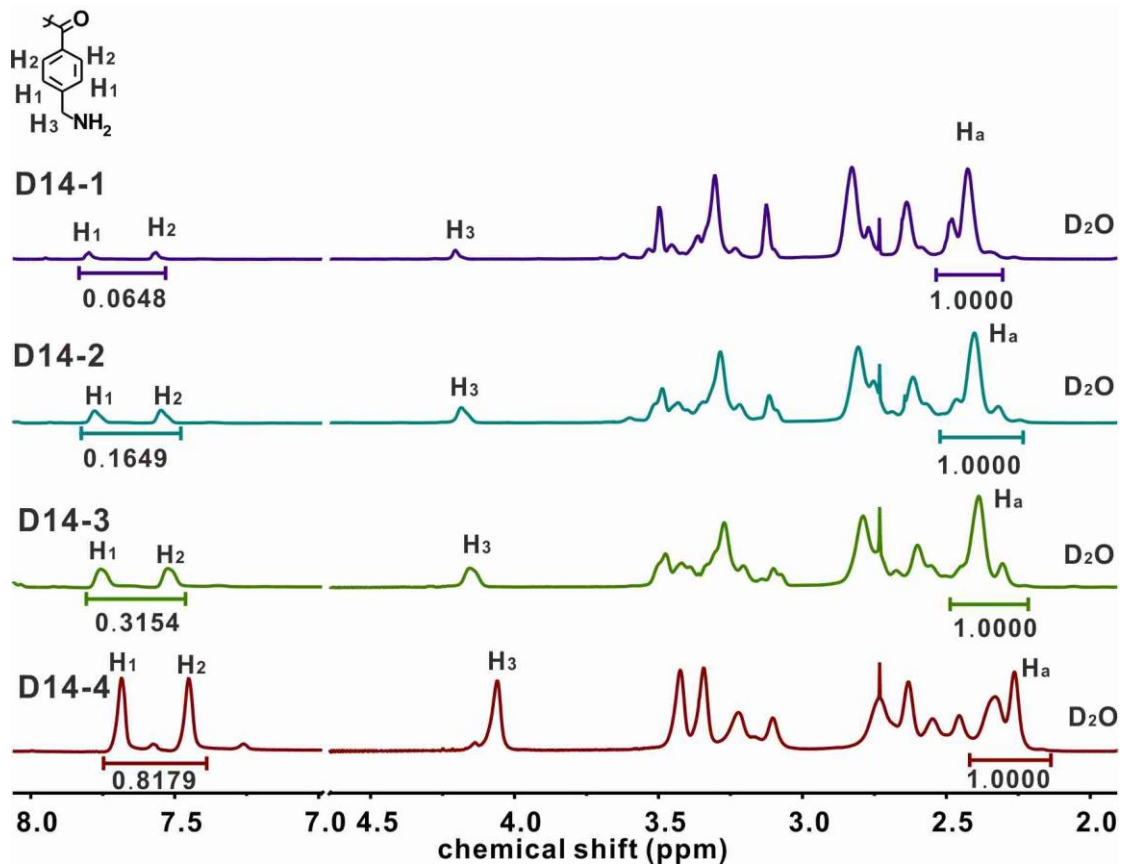

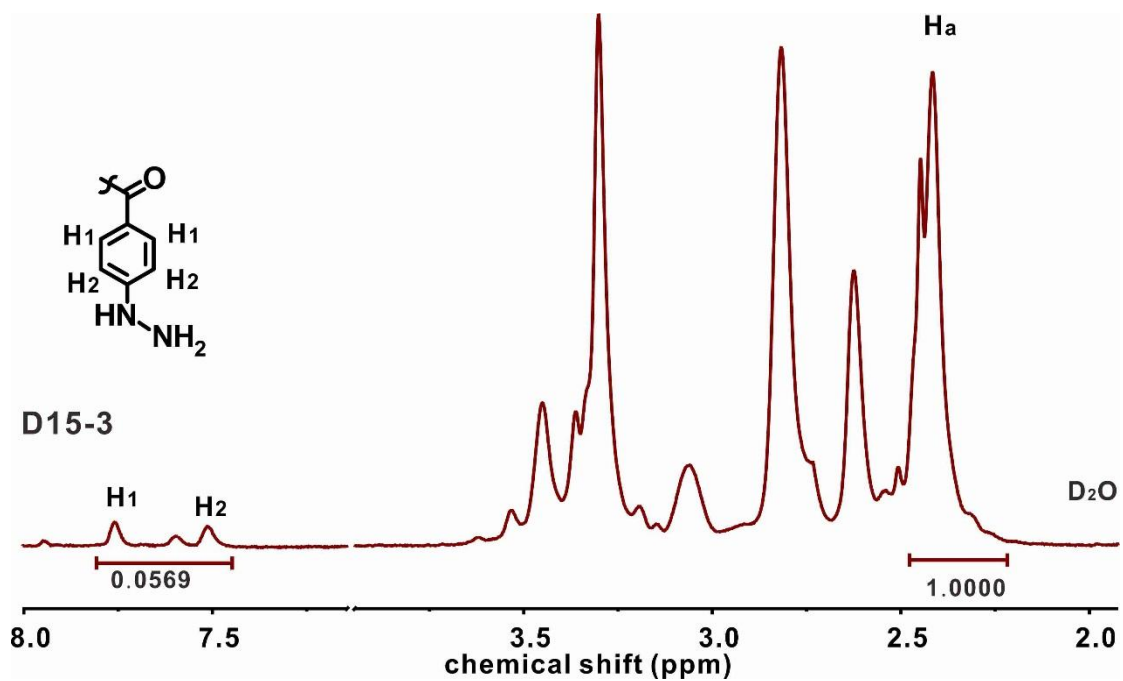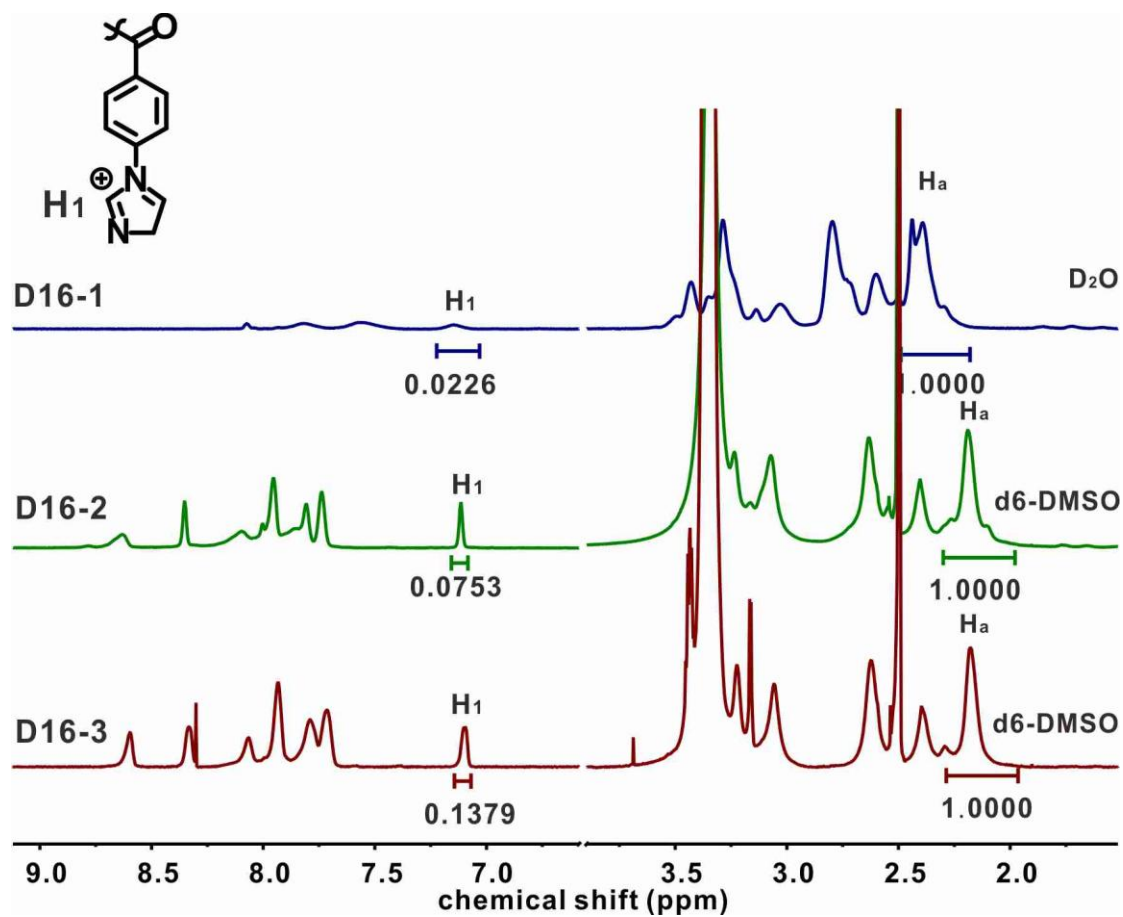

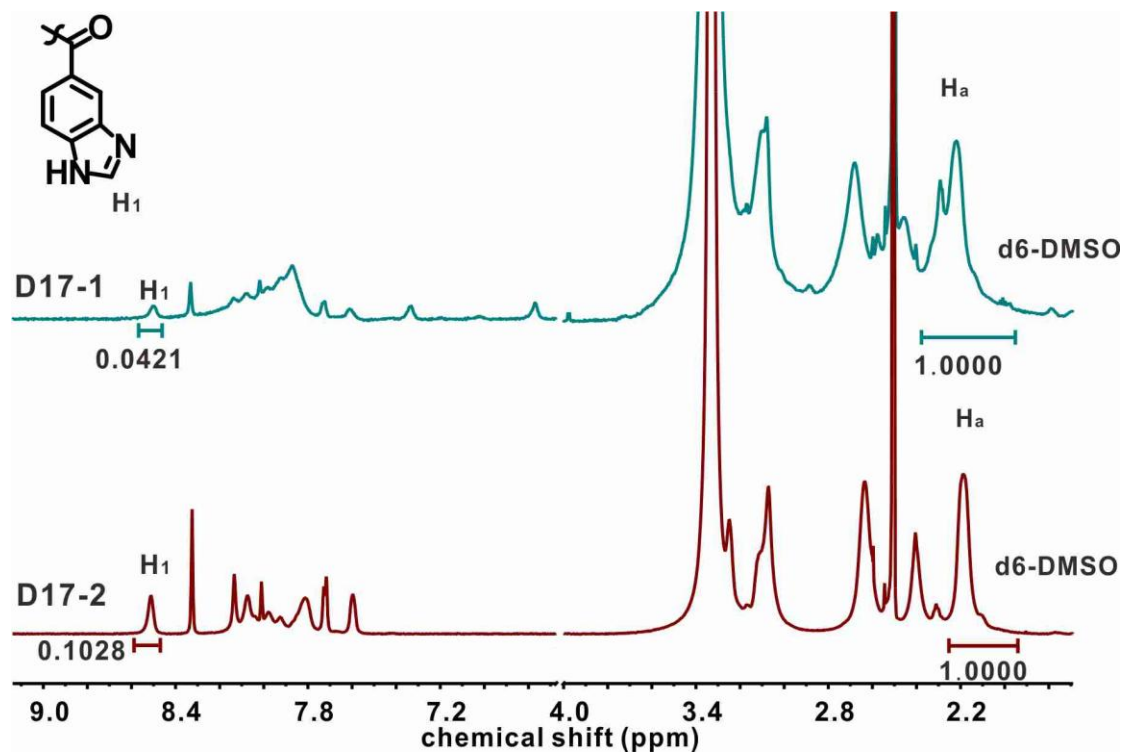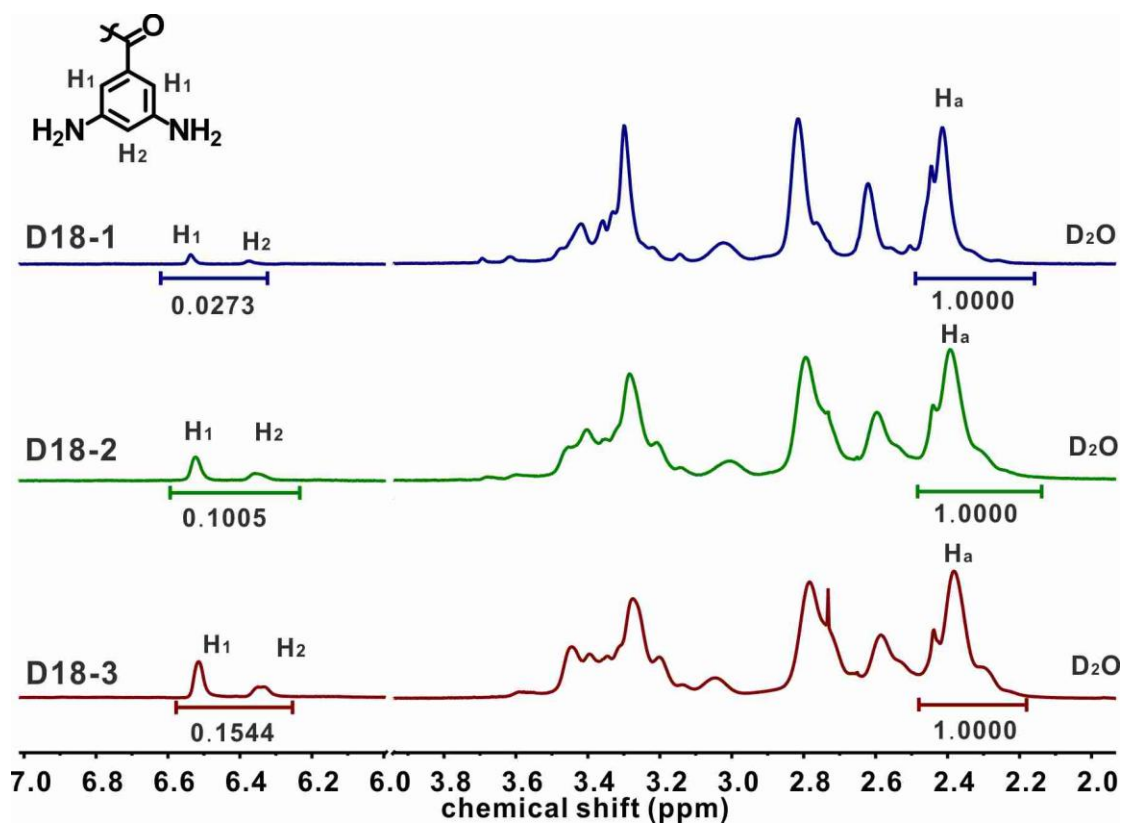

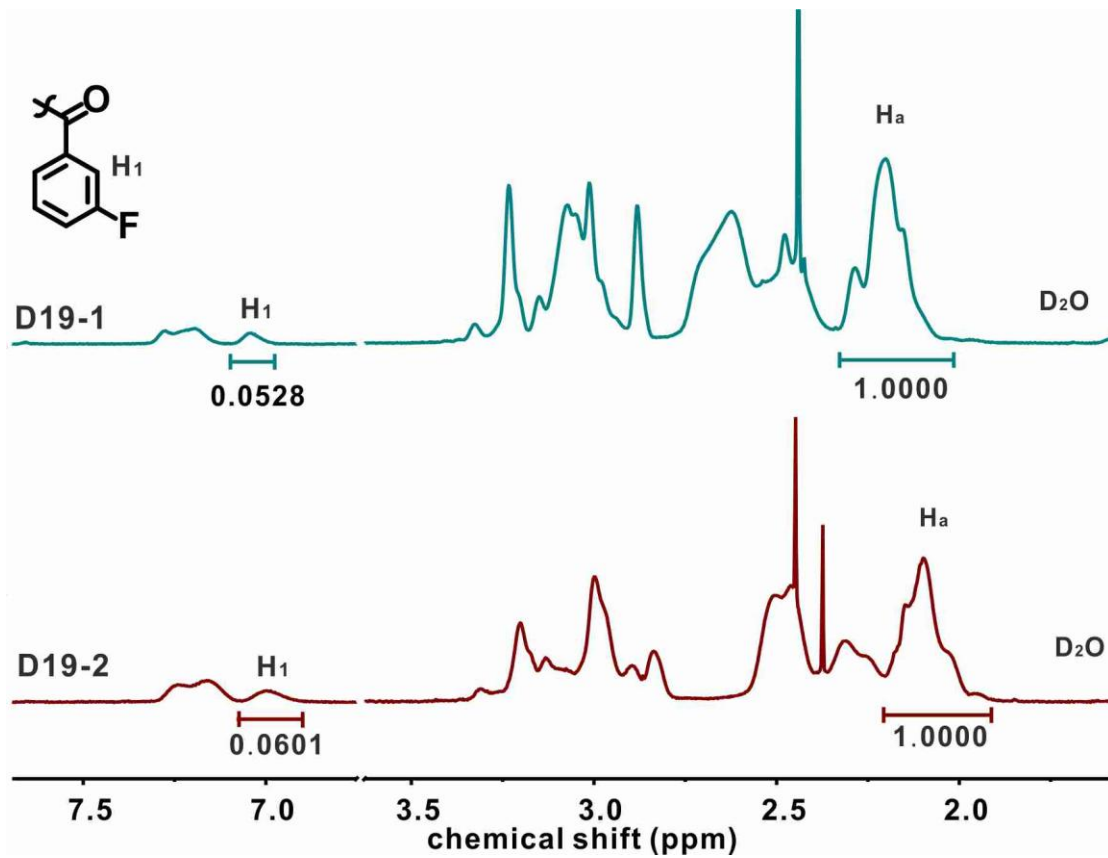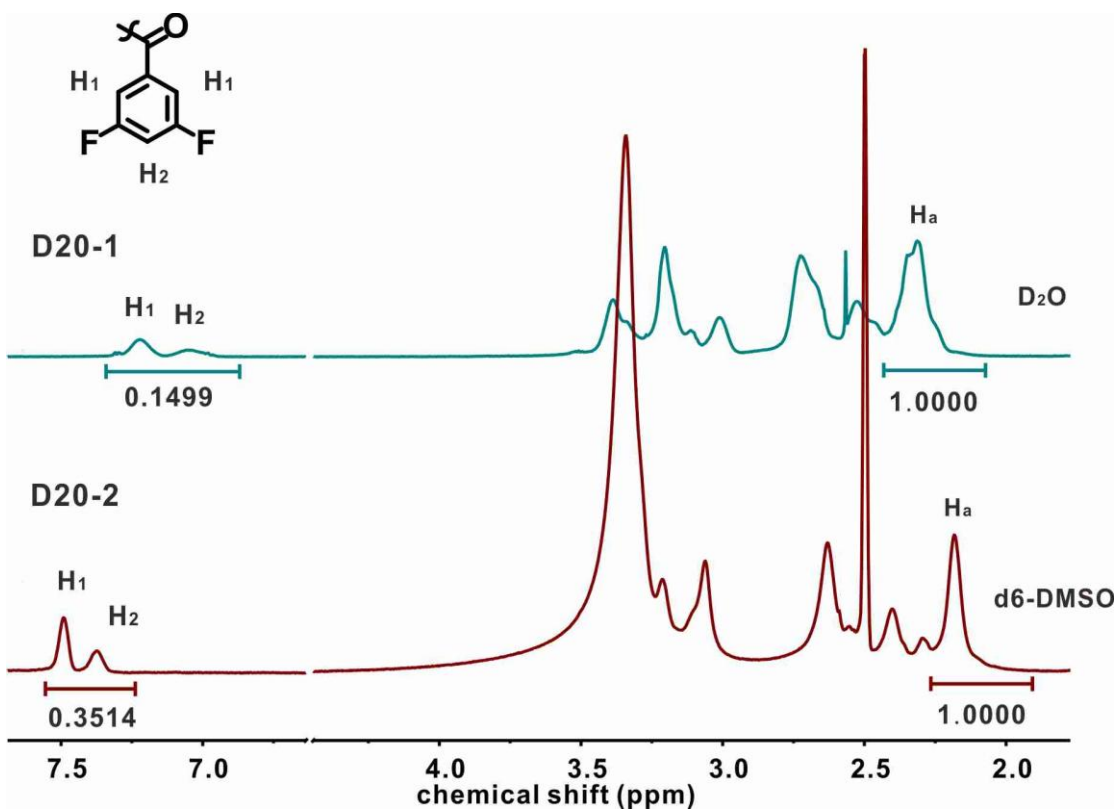



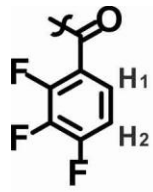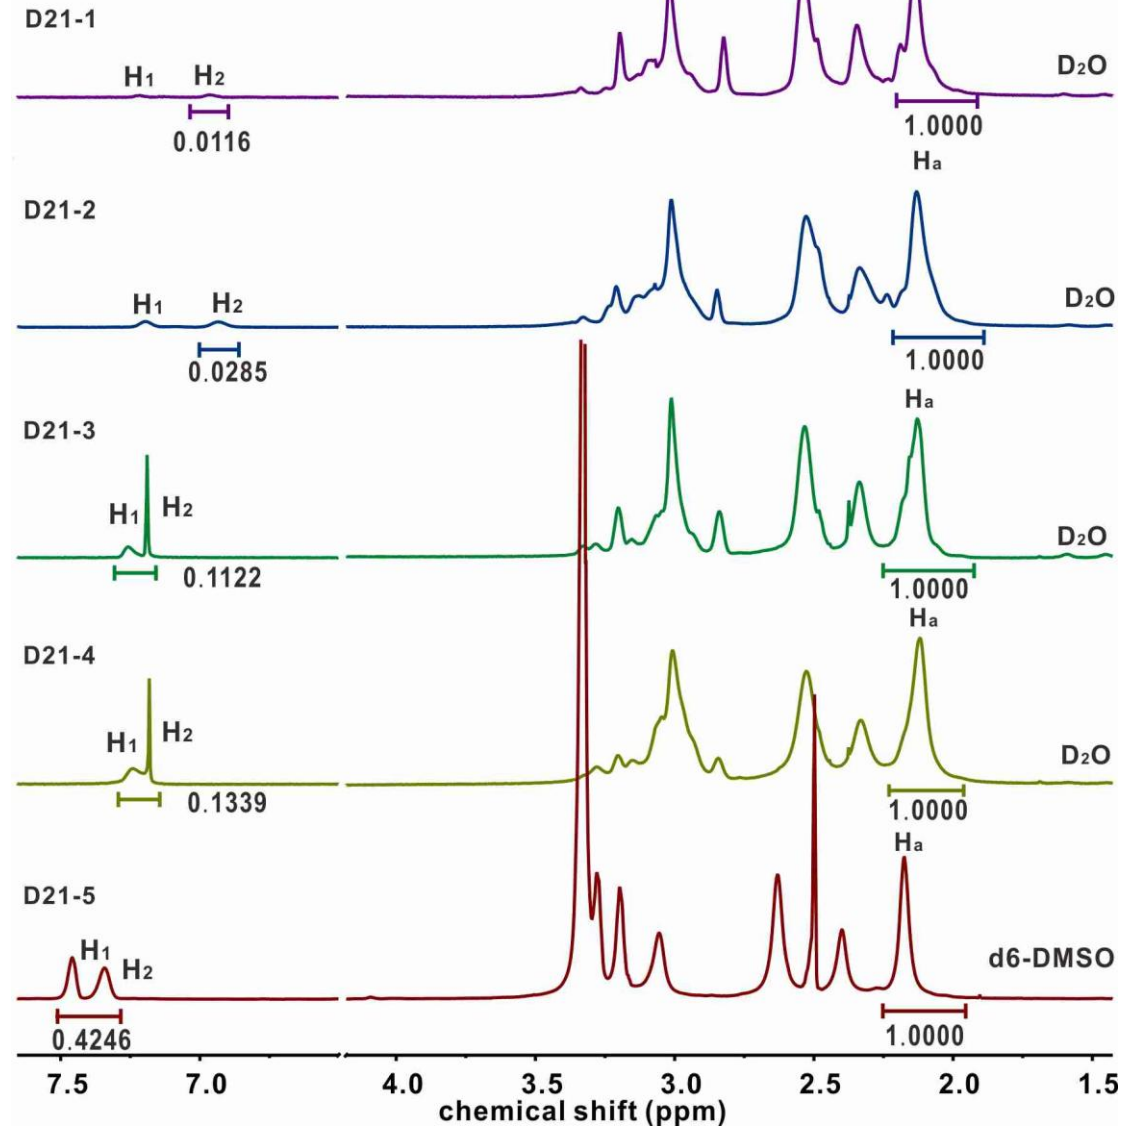



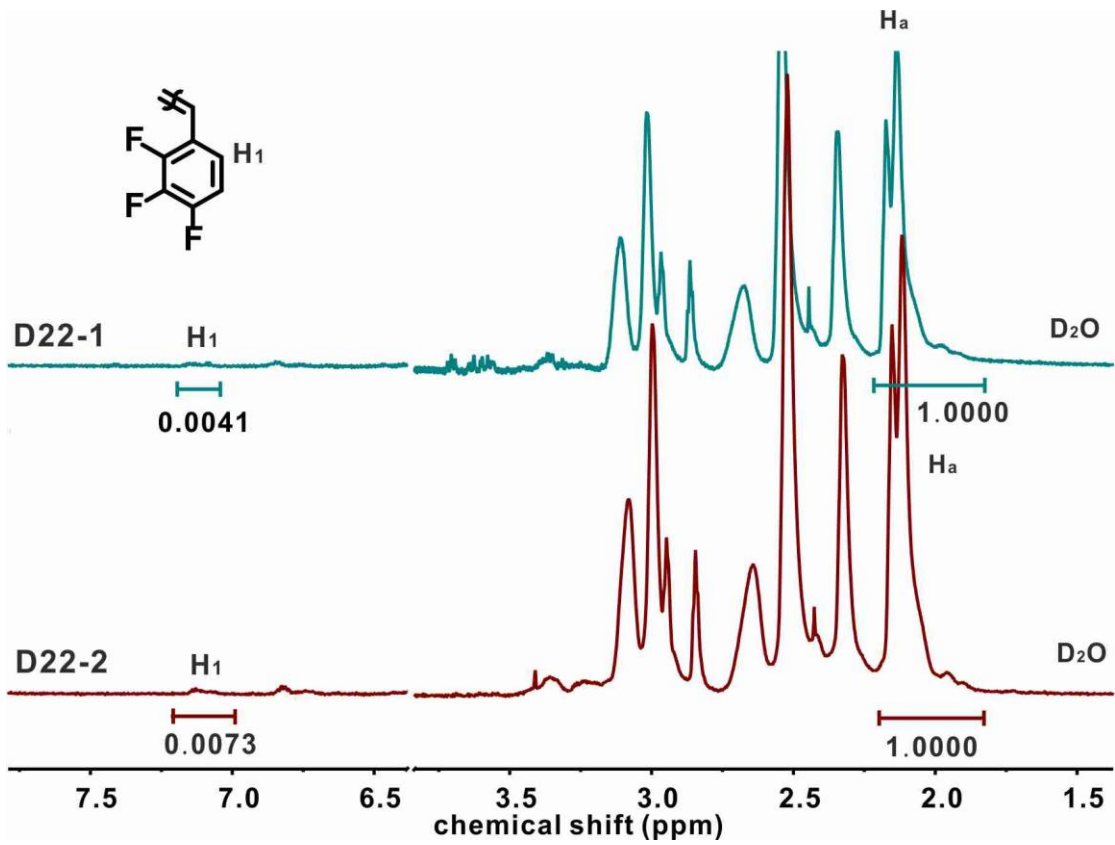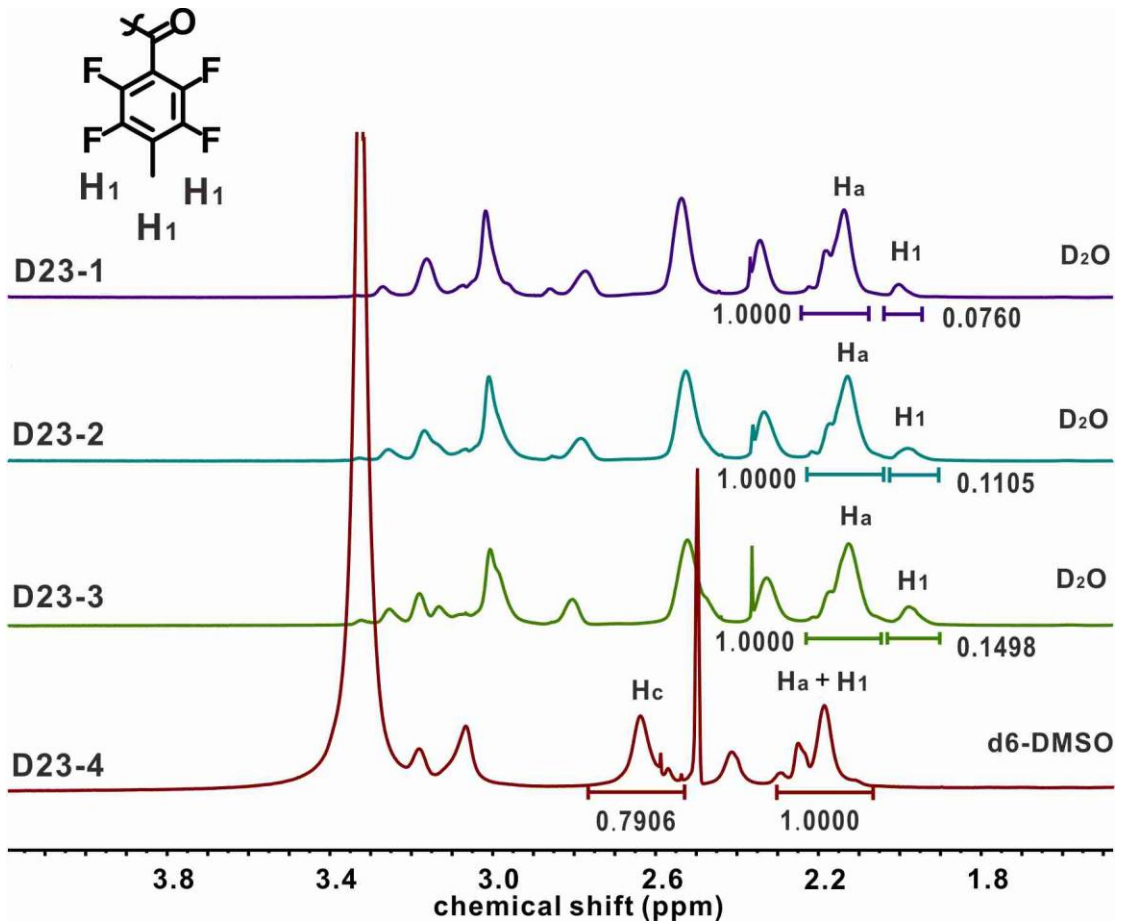

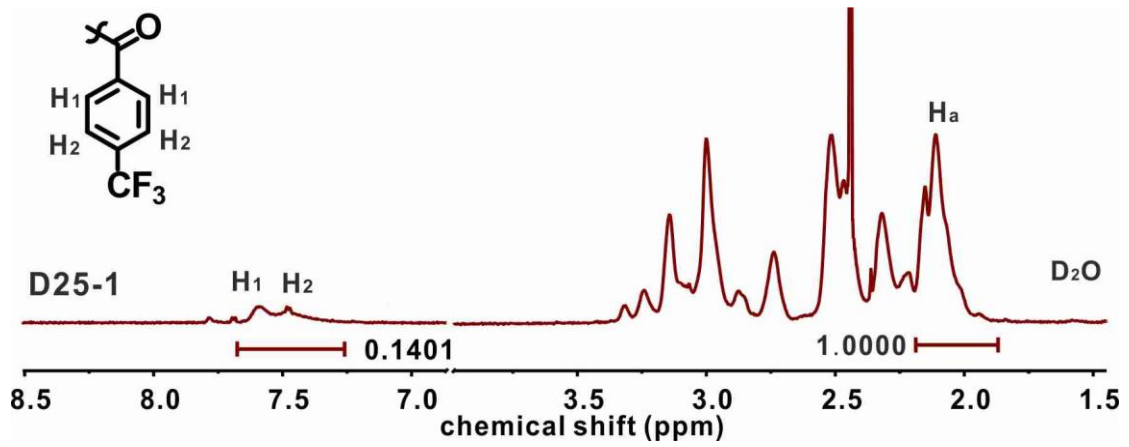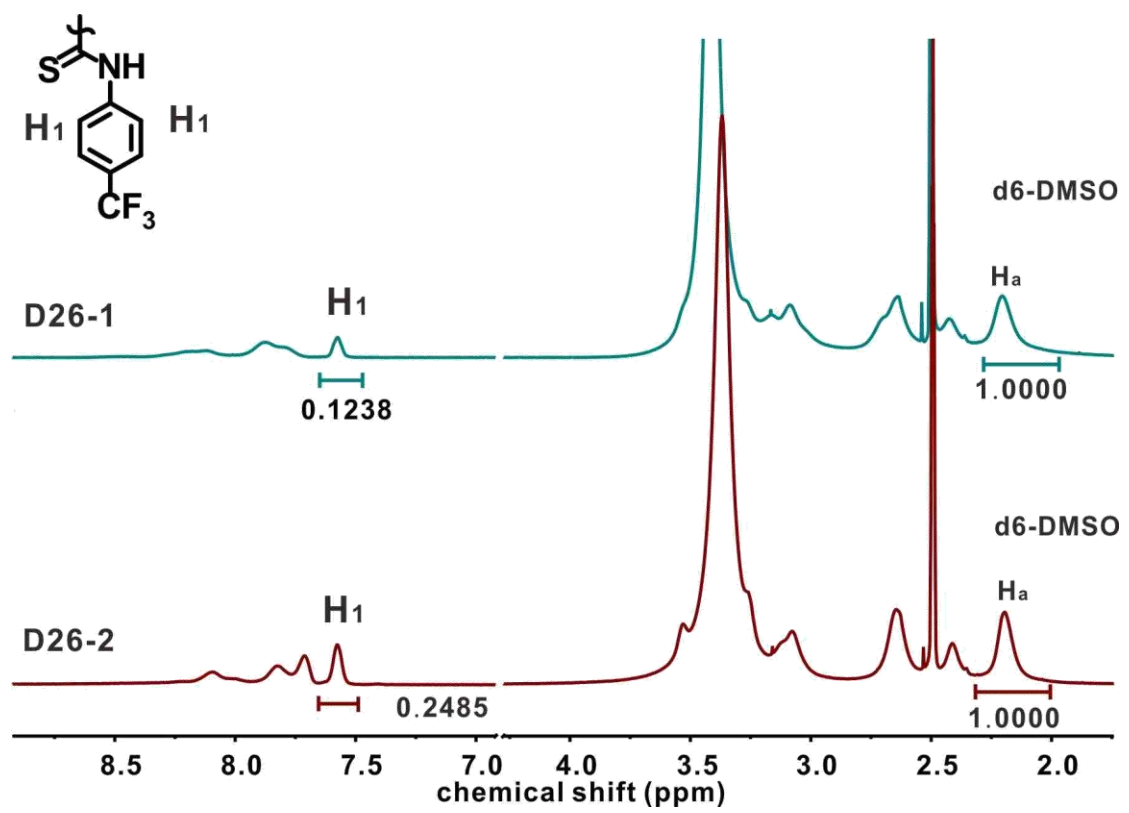

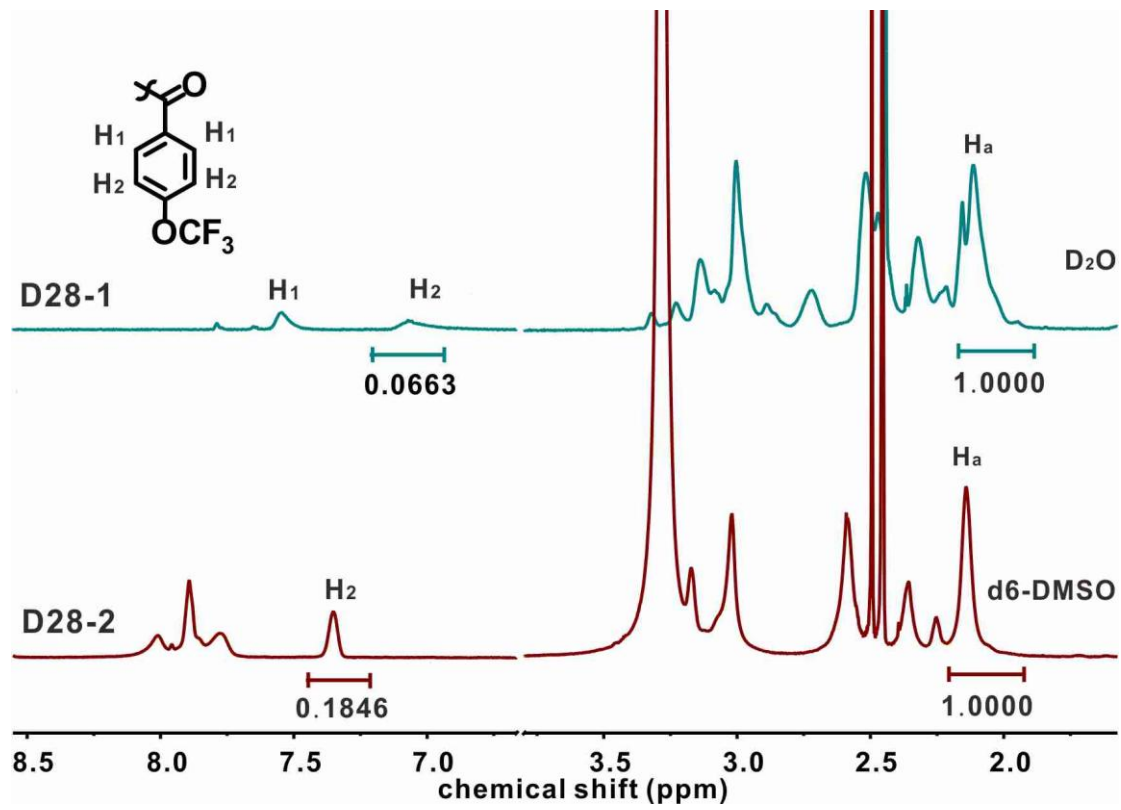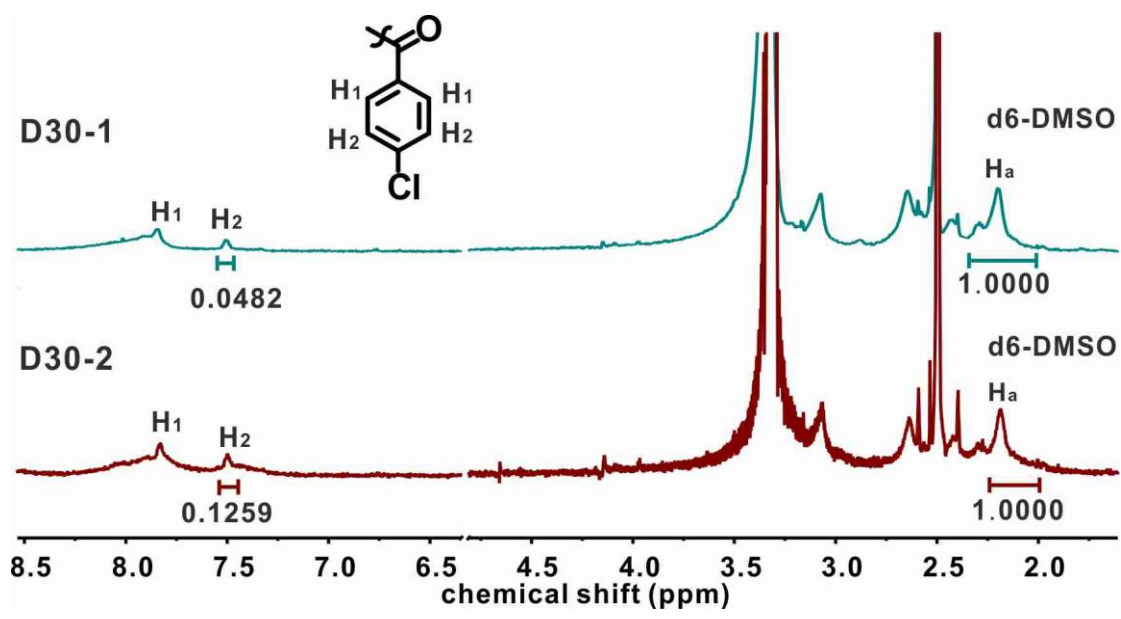

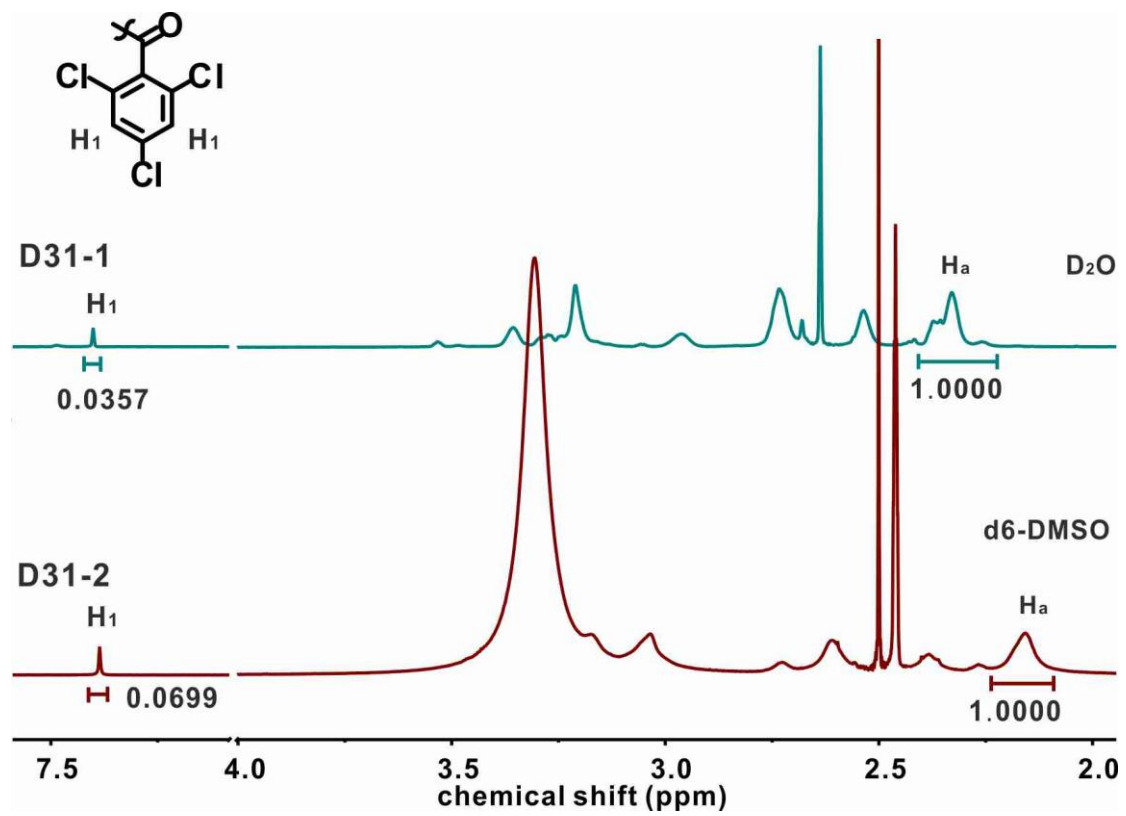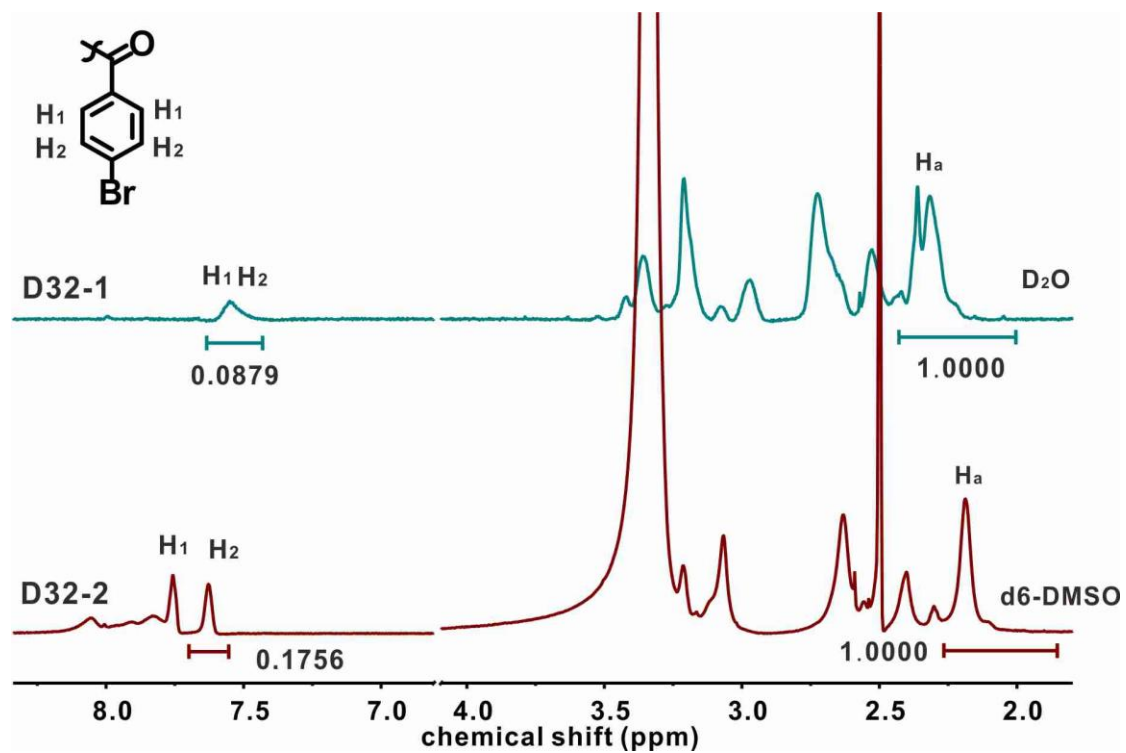

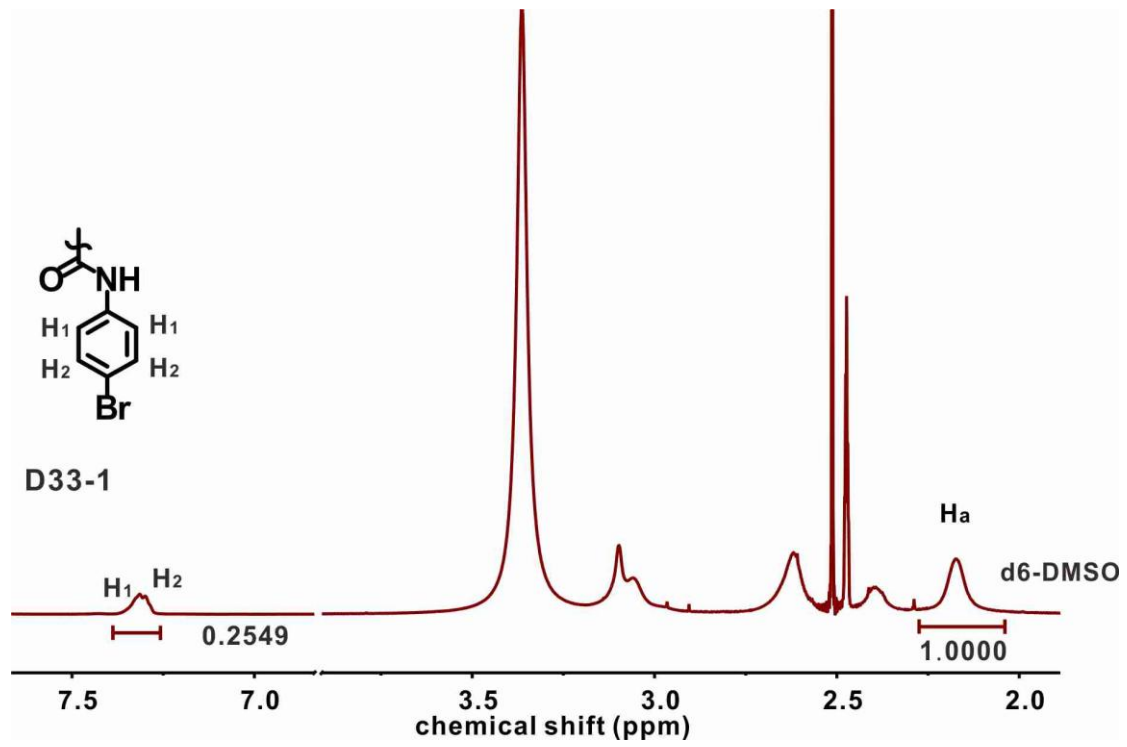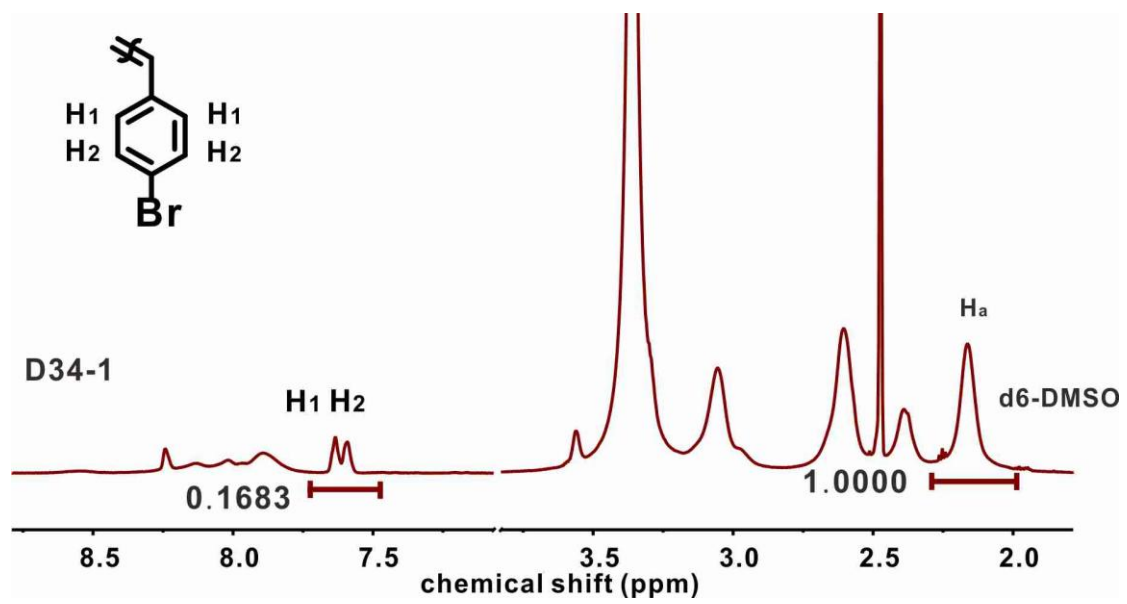

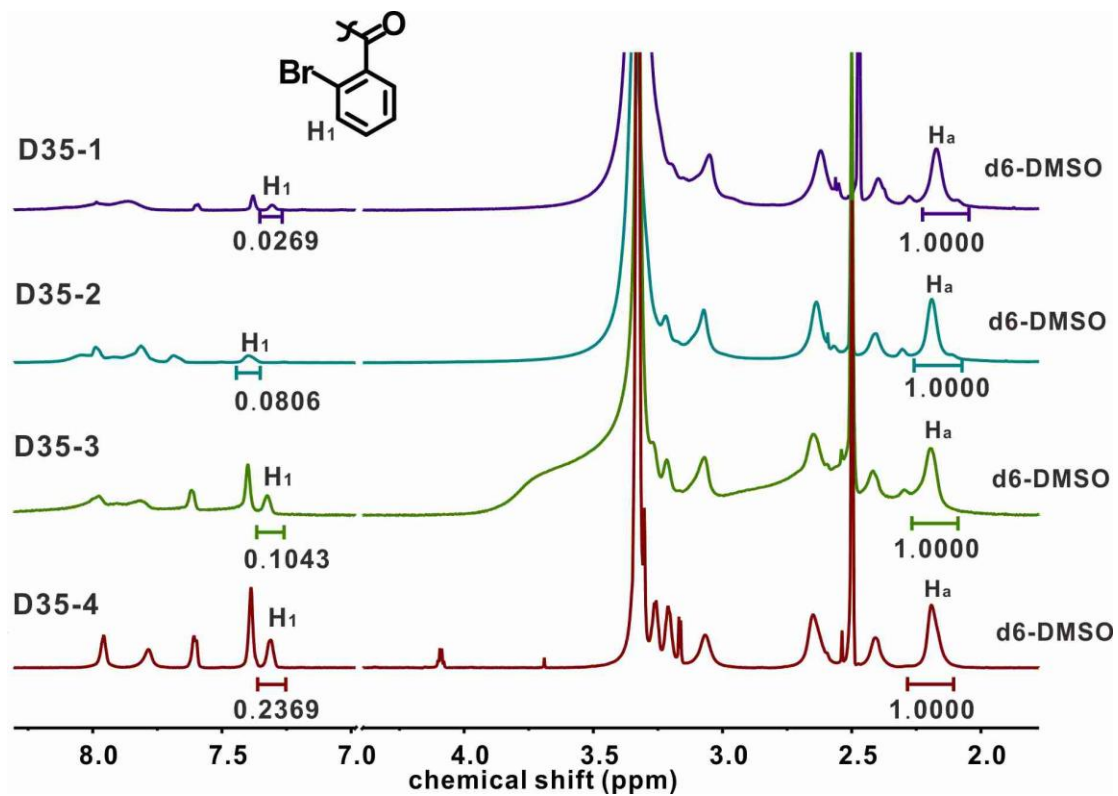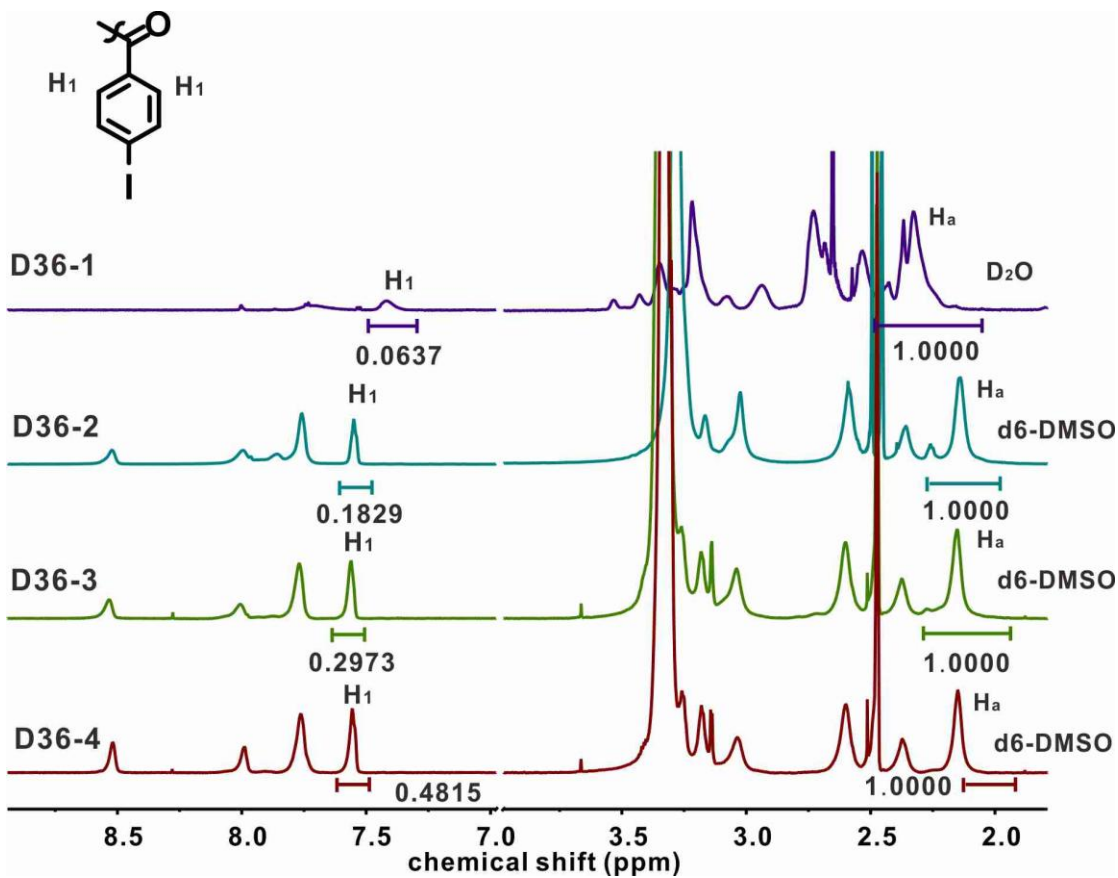



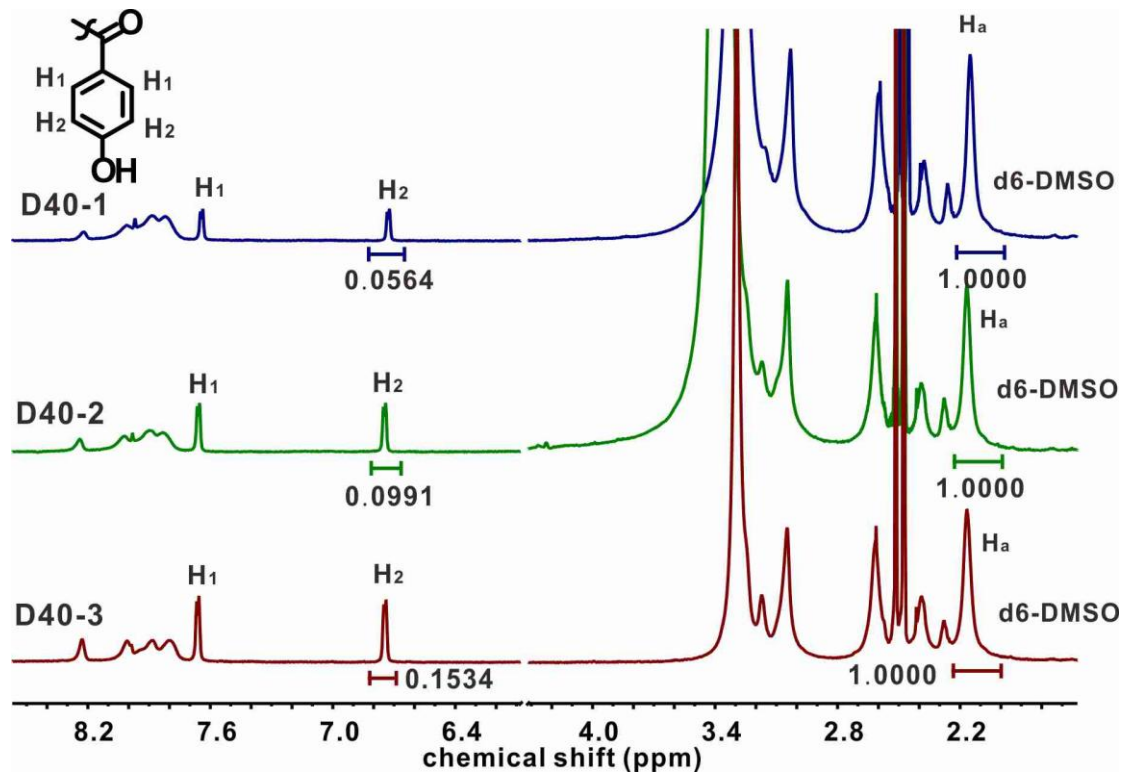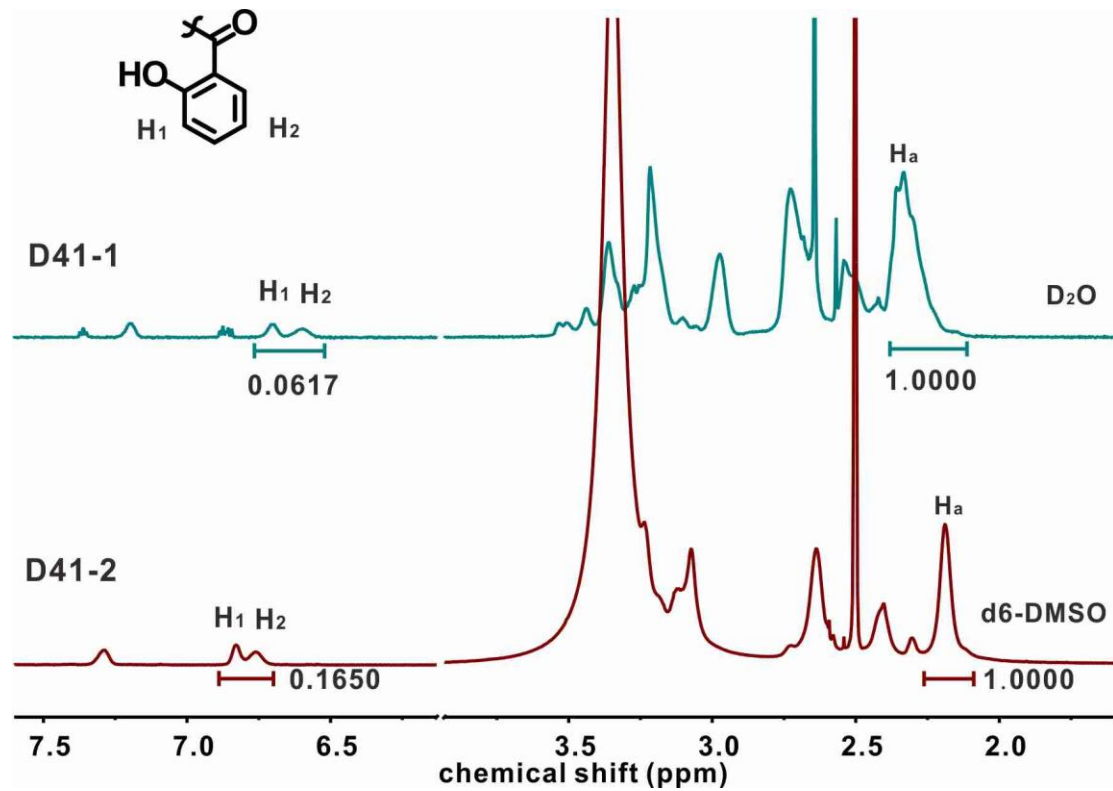

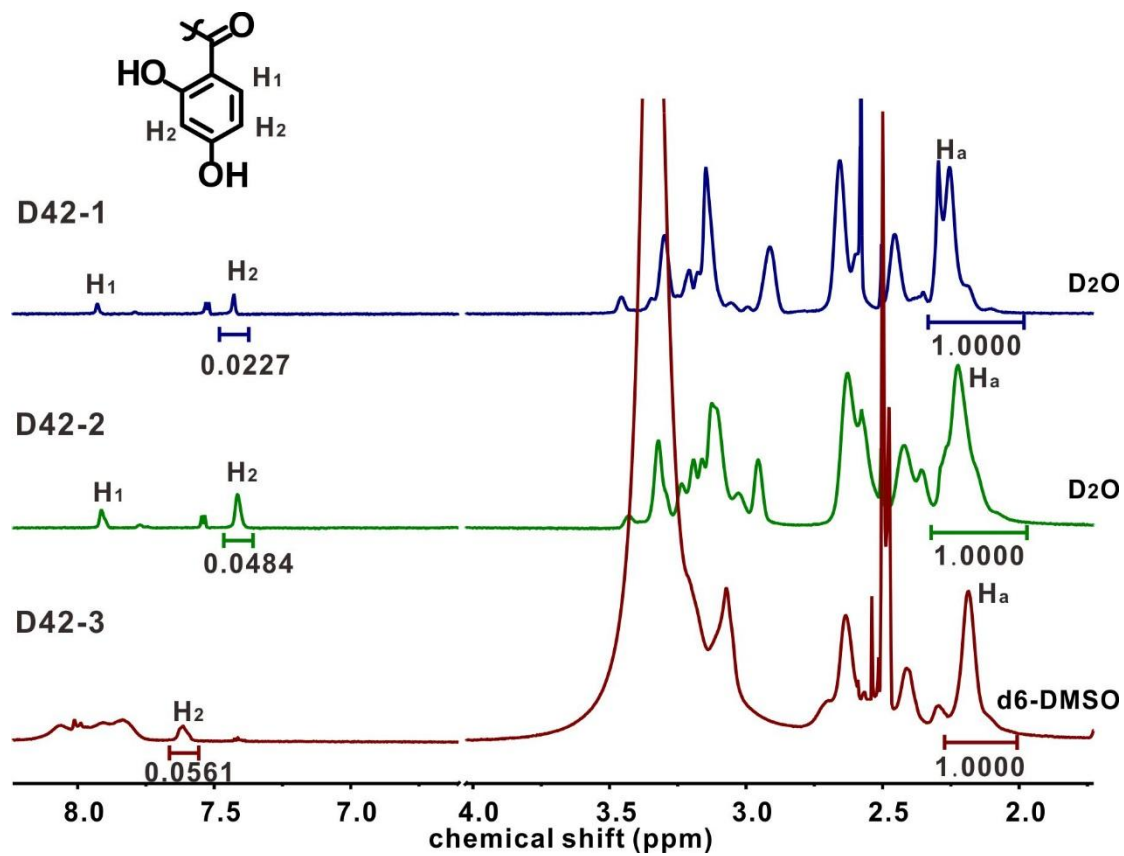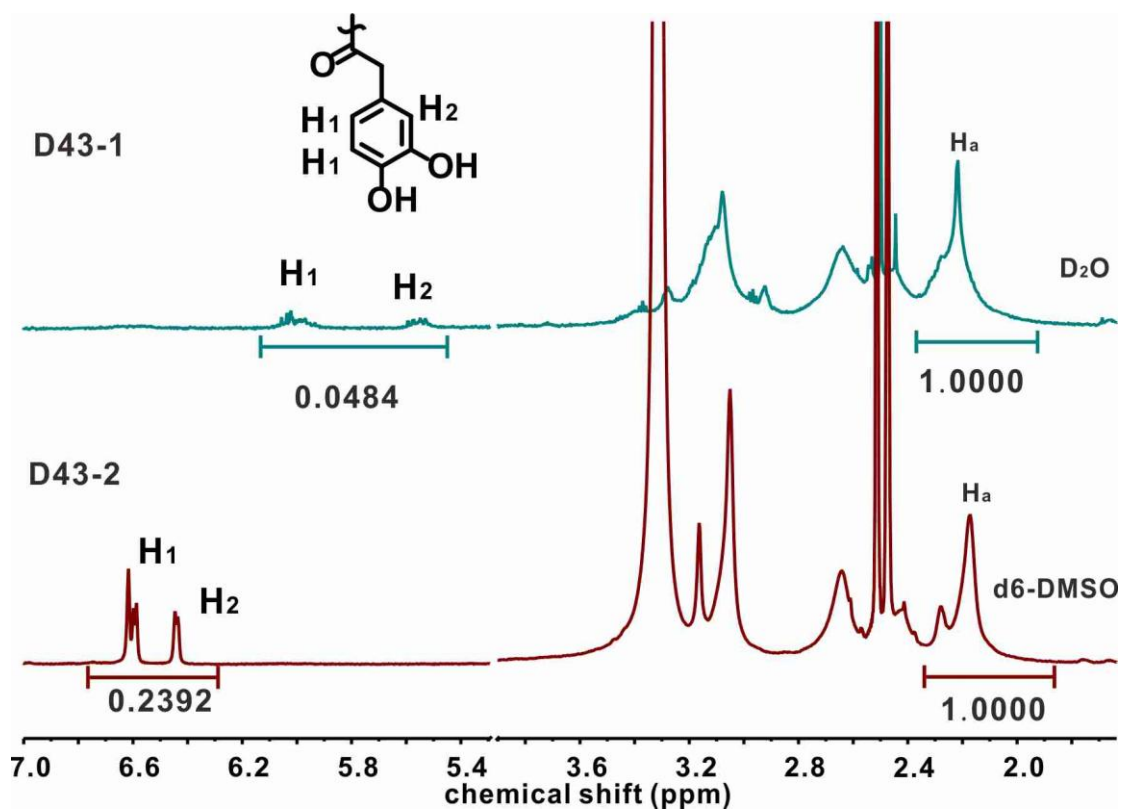



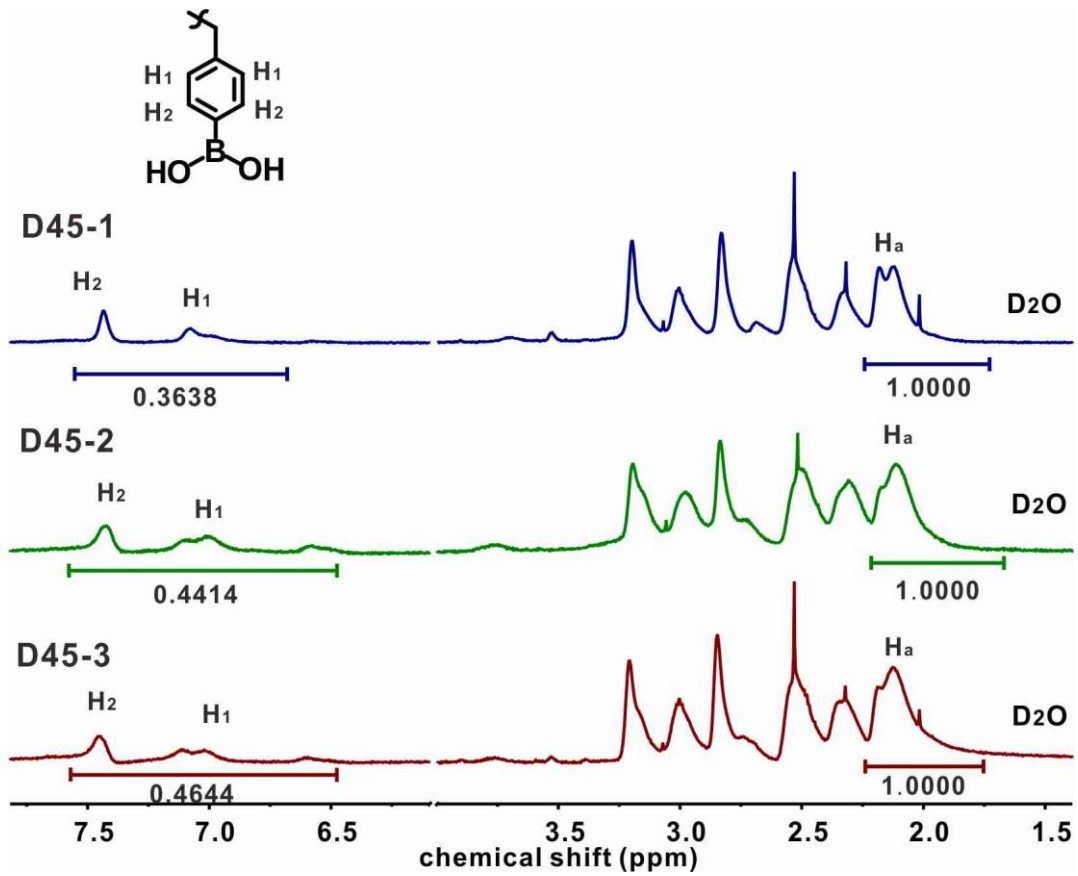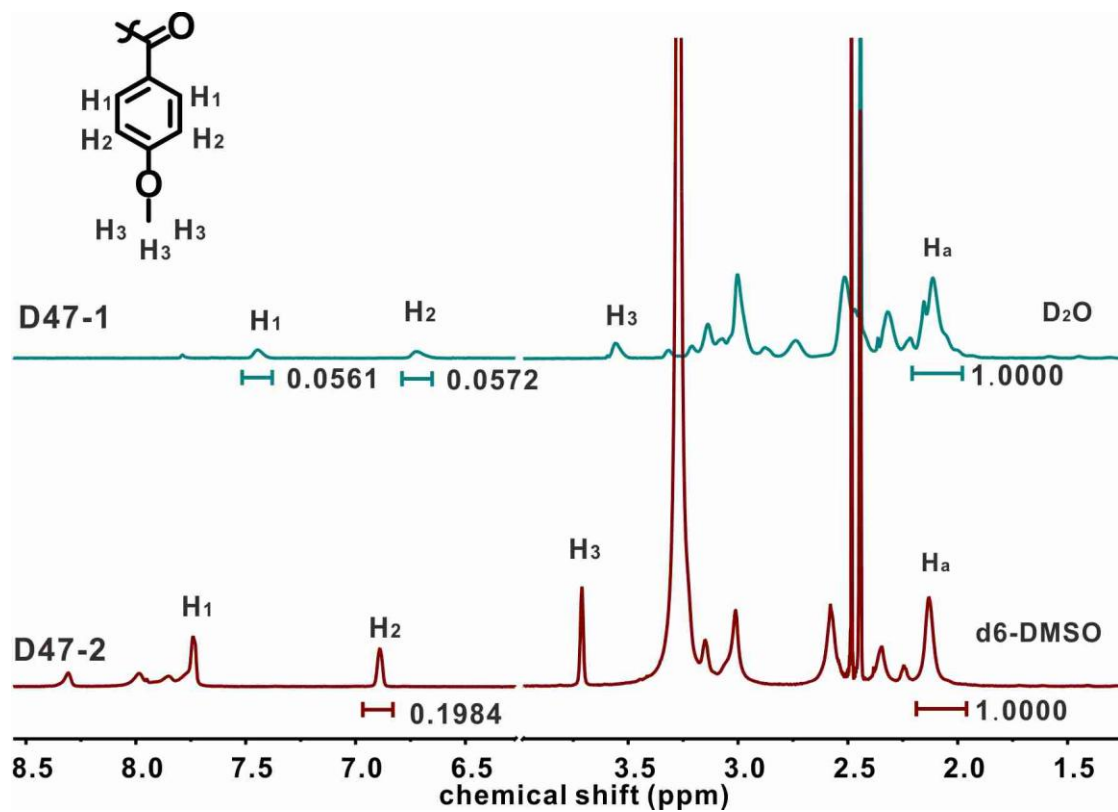

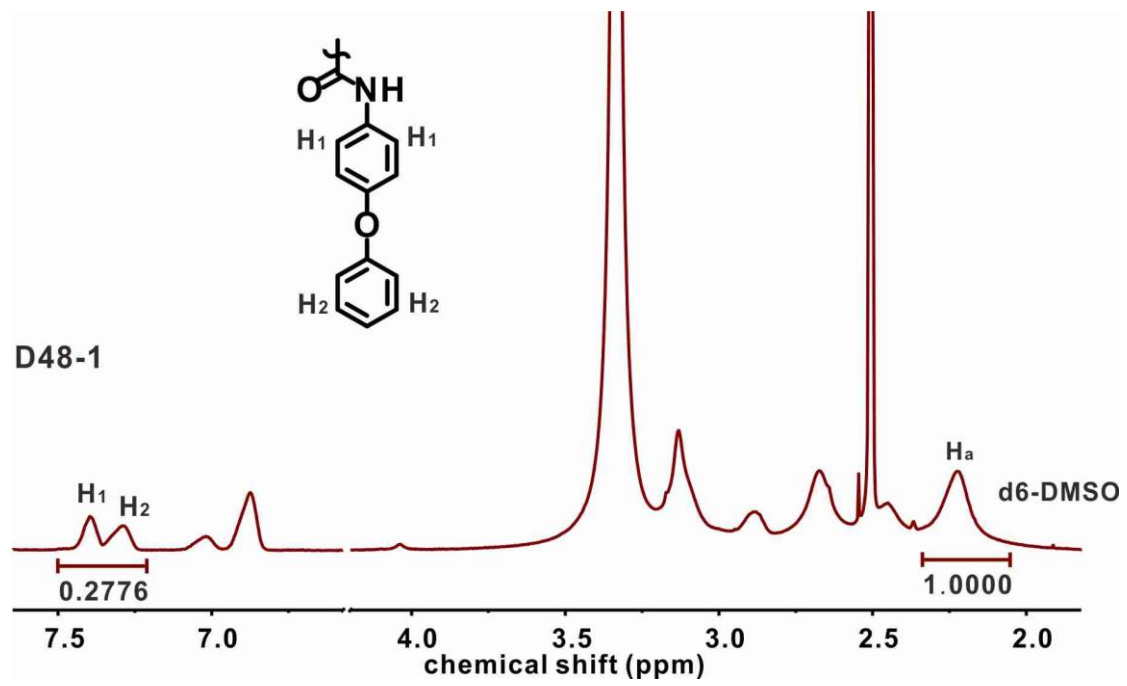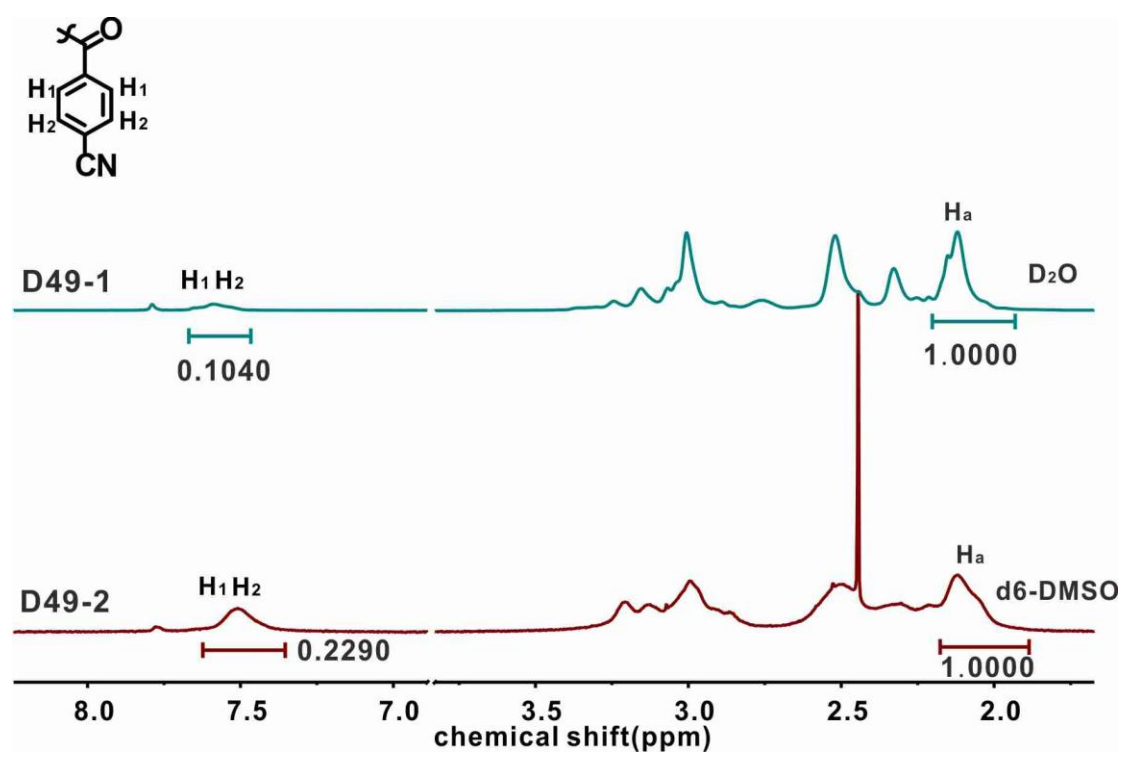

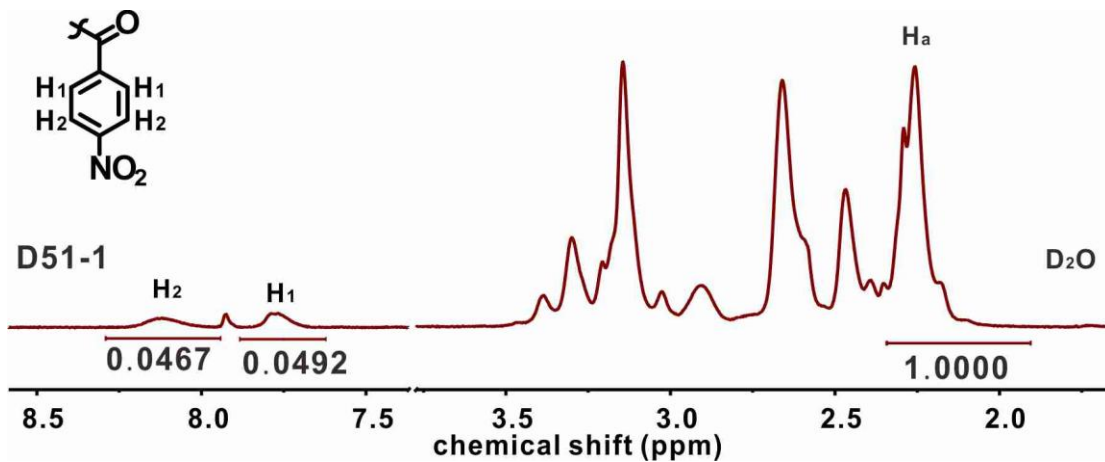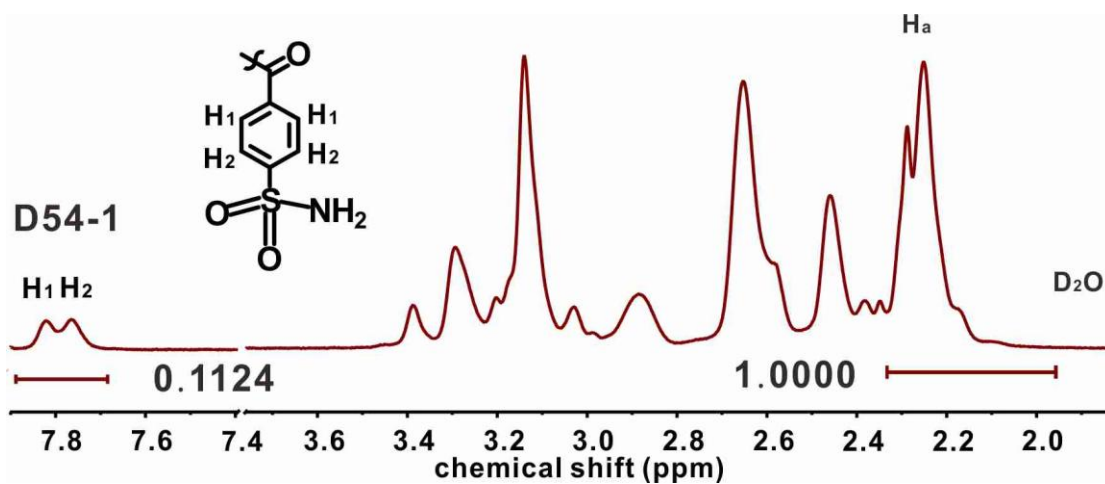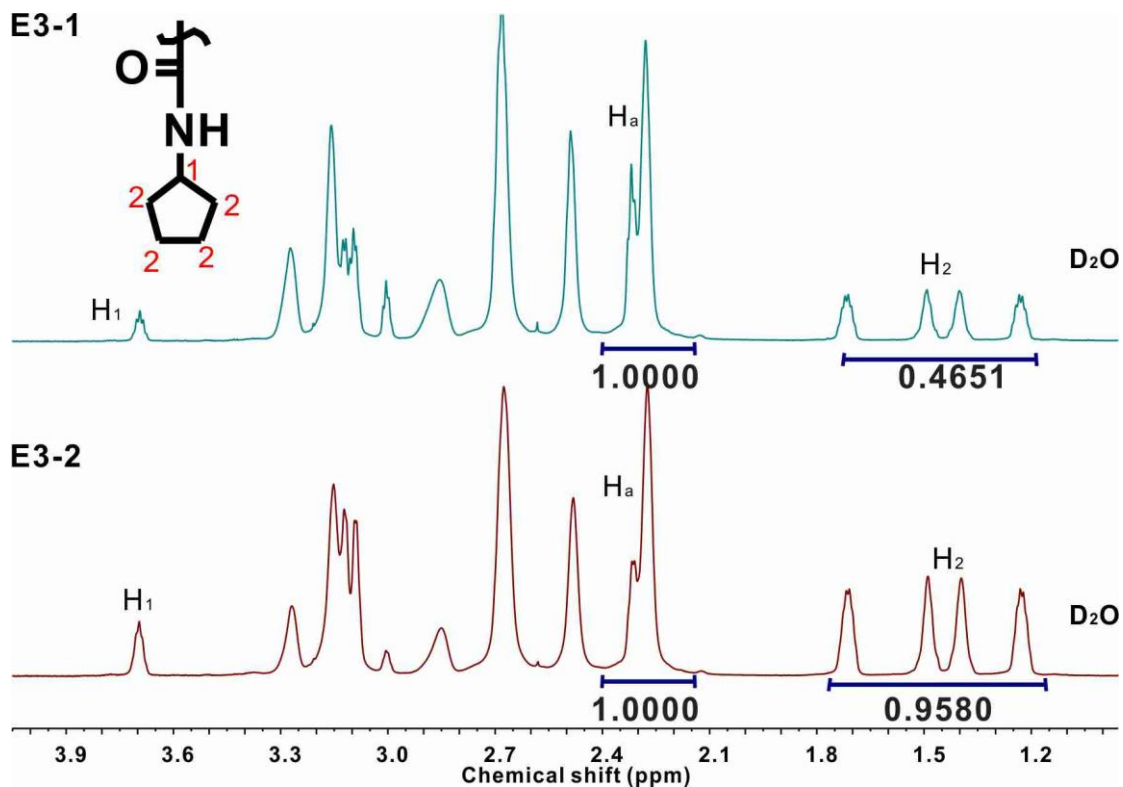

E4-1

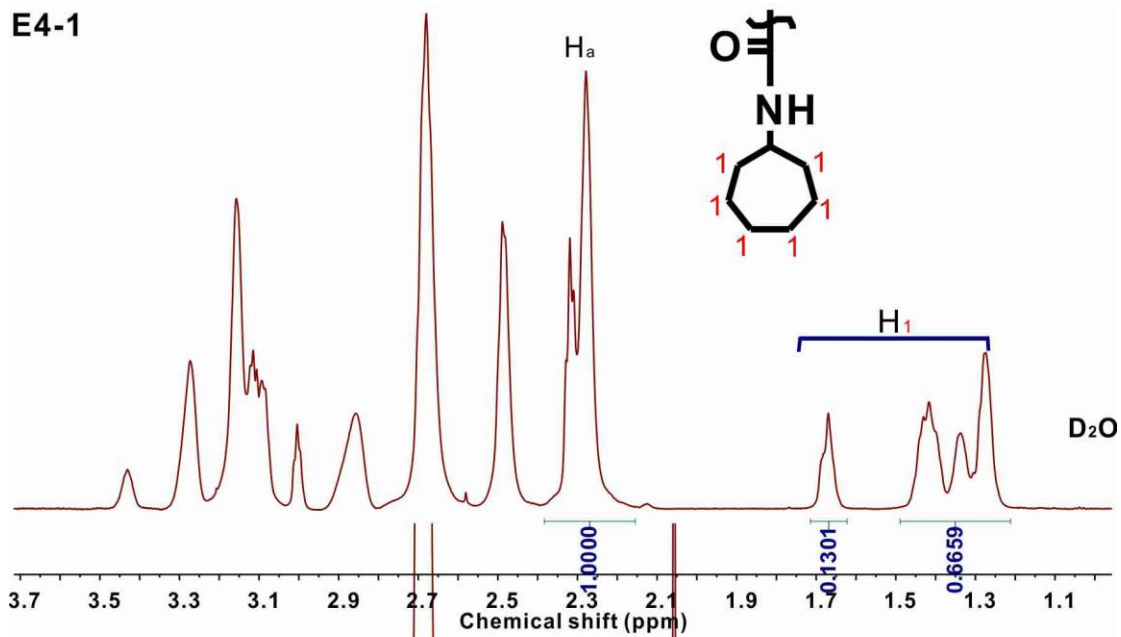

E4-2

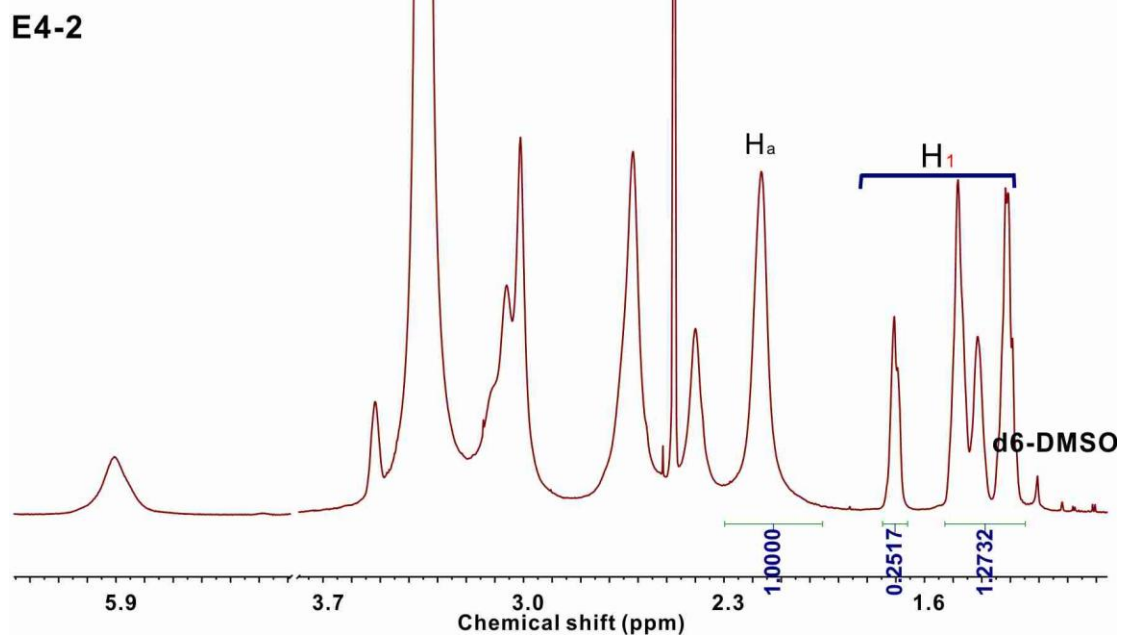

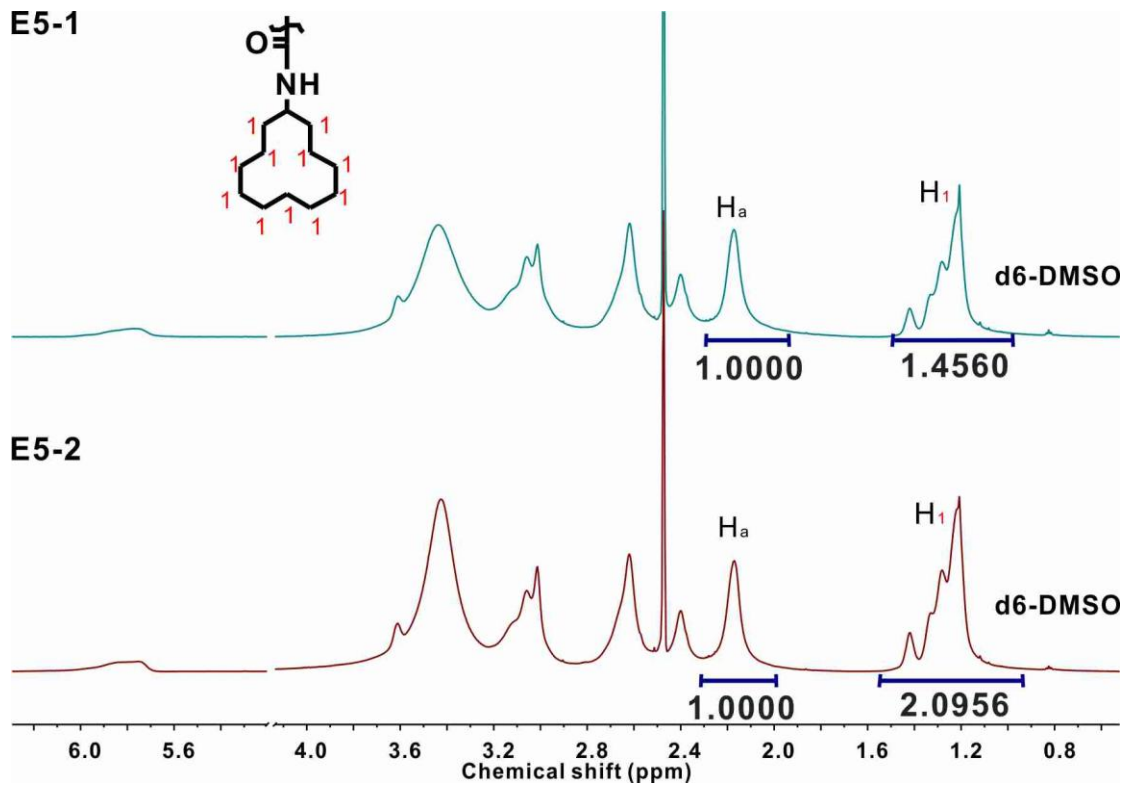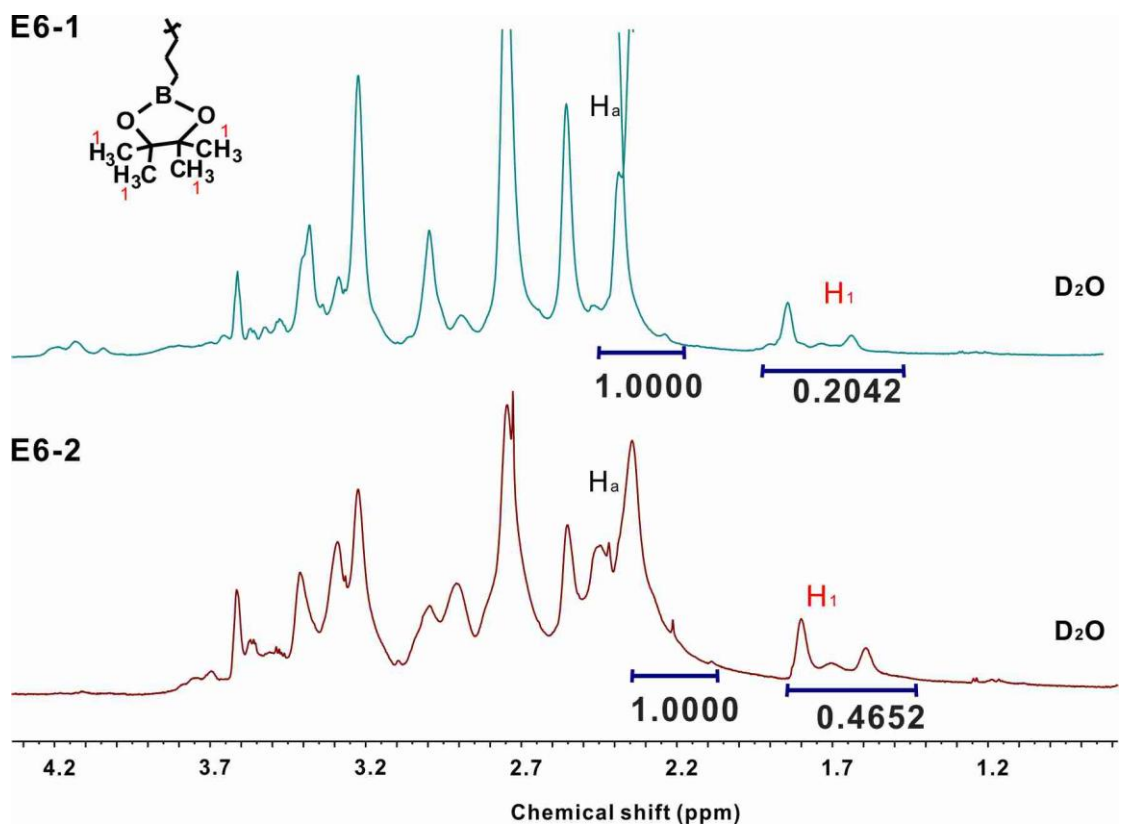

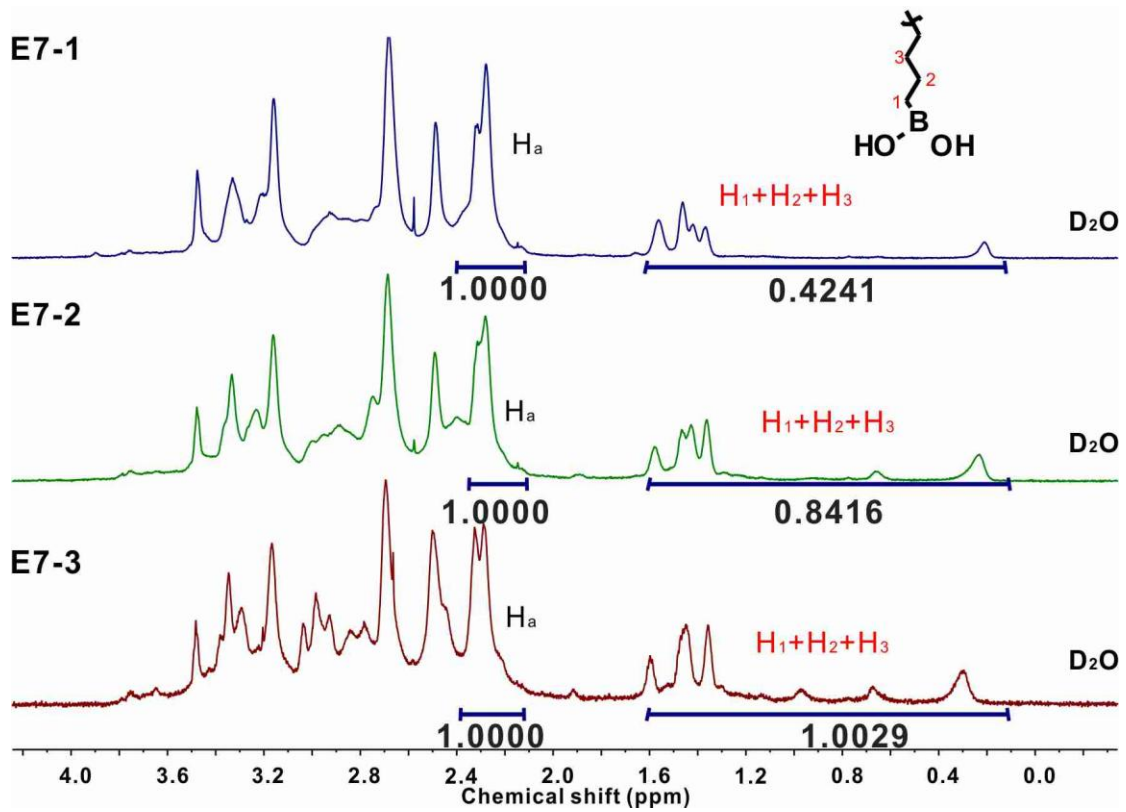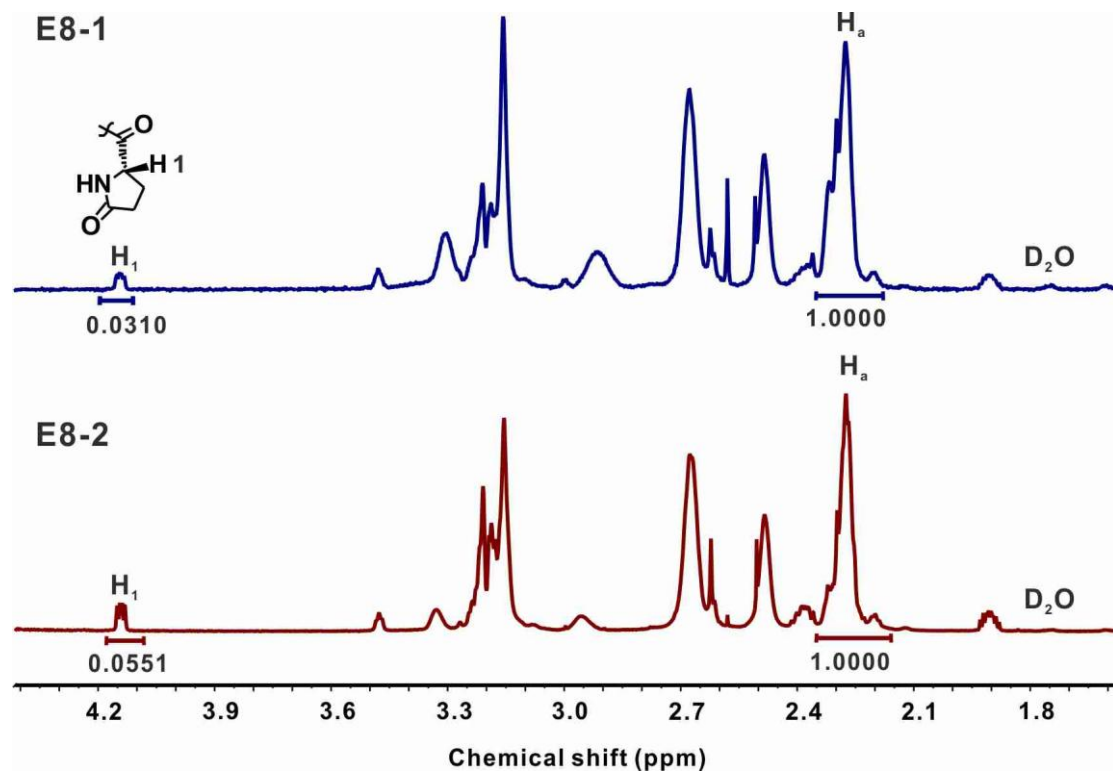



E9-1

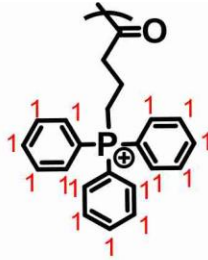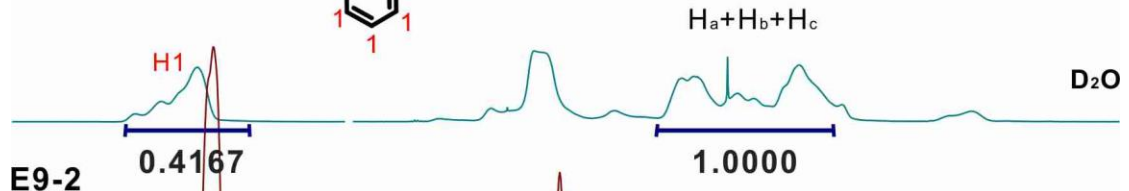

E9-2

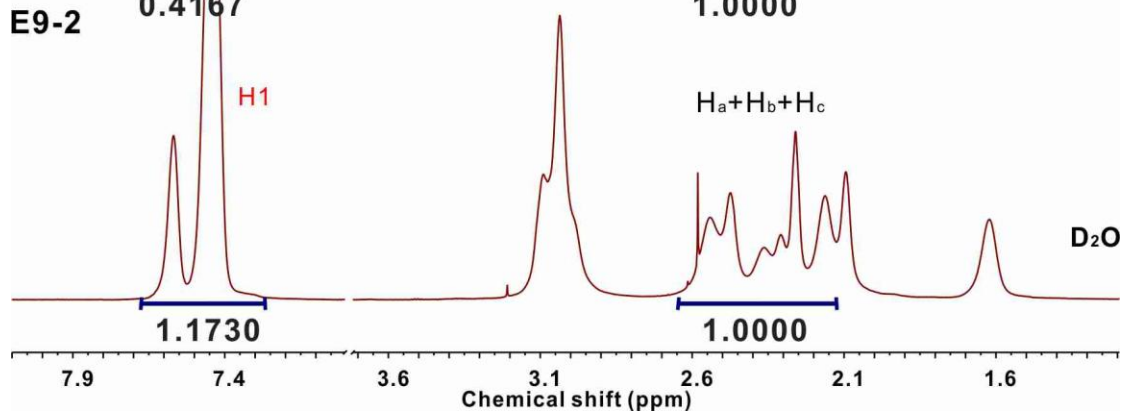

S1-1

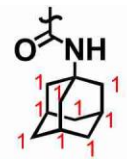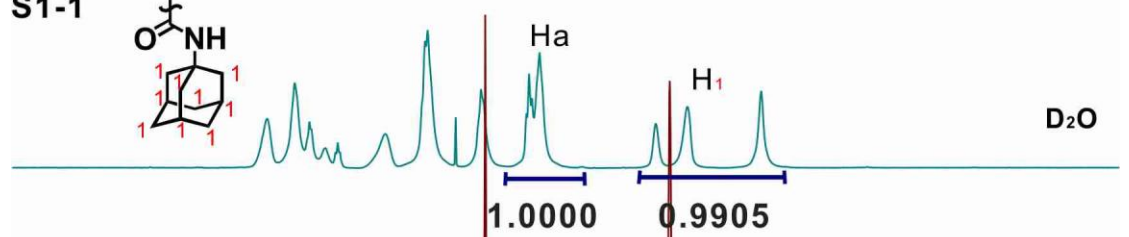

S1-2

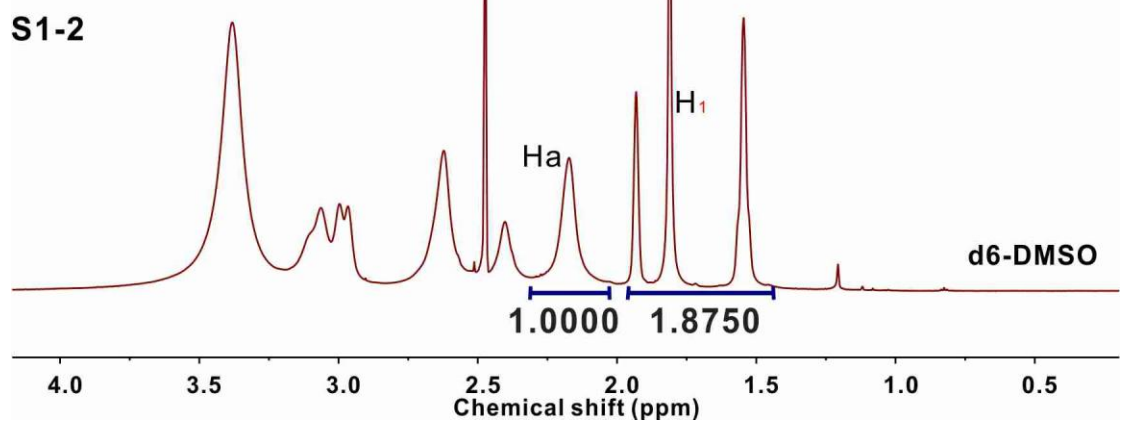

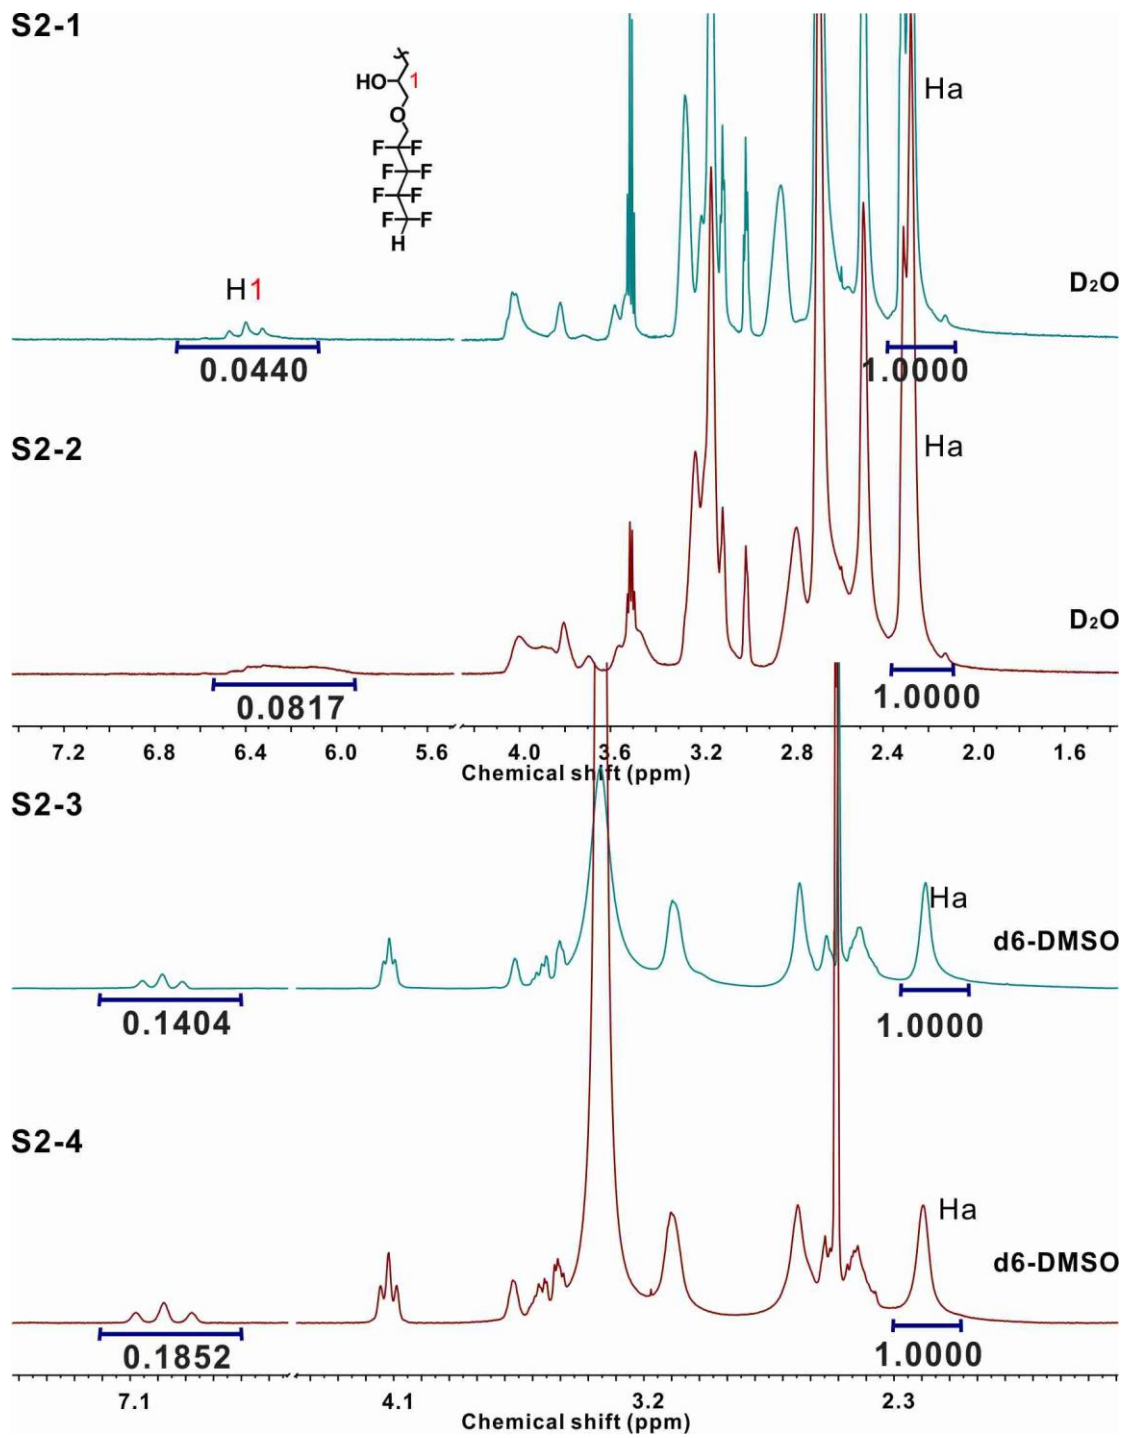



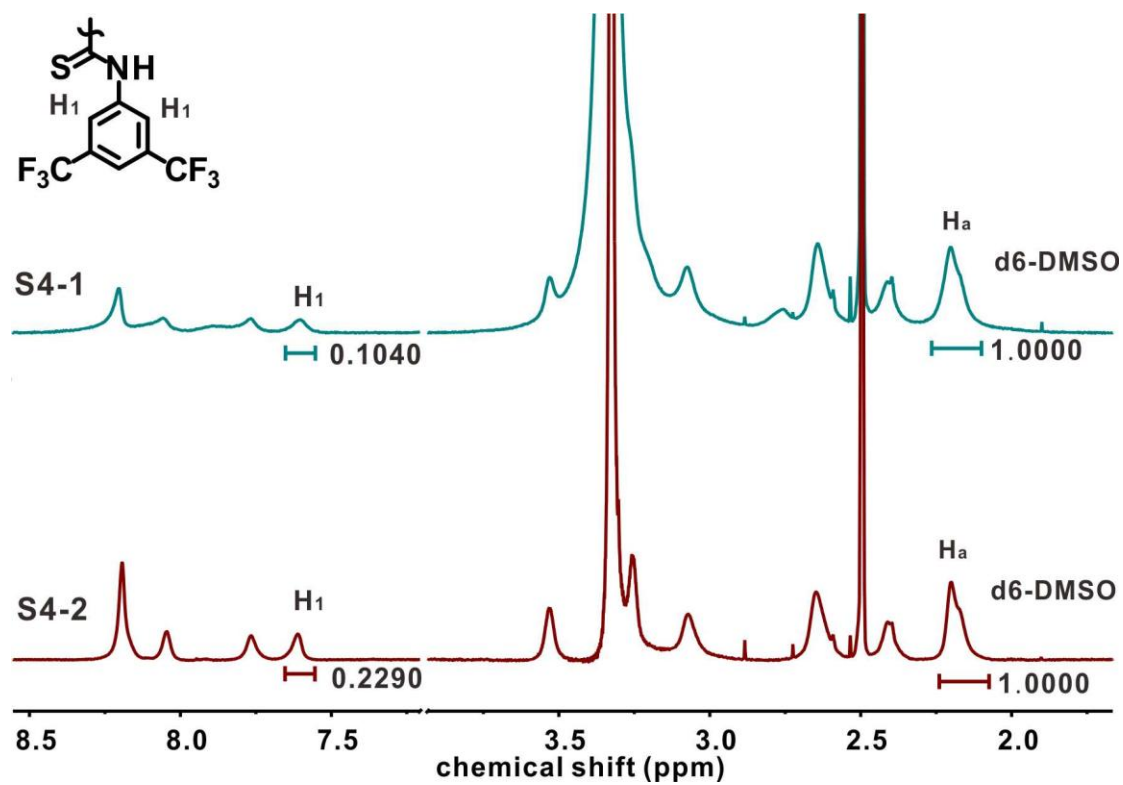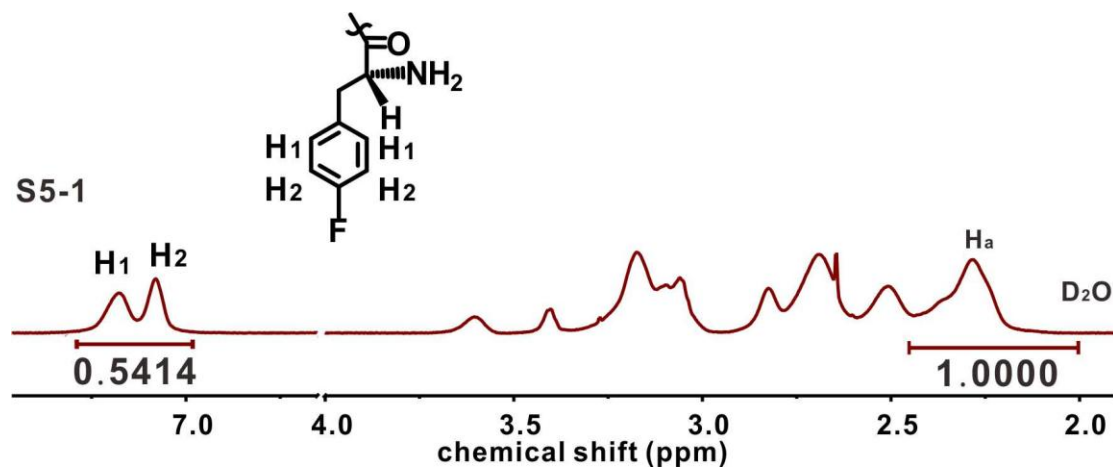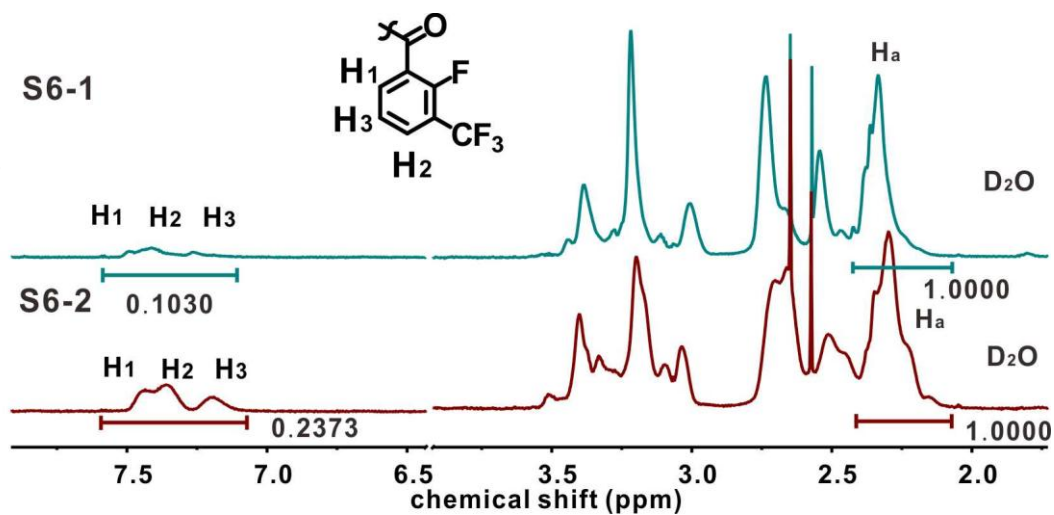

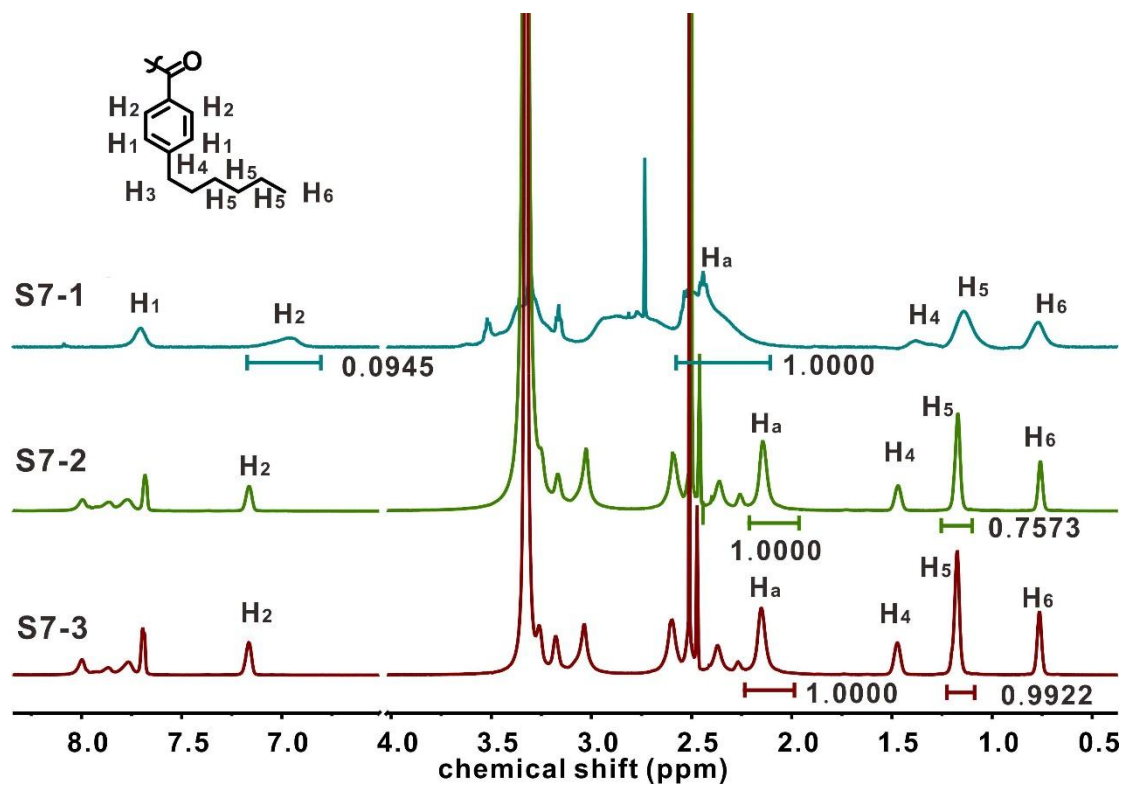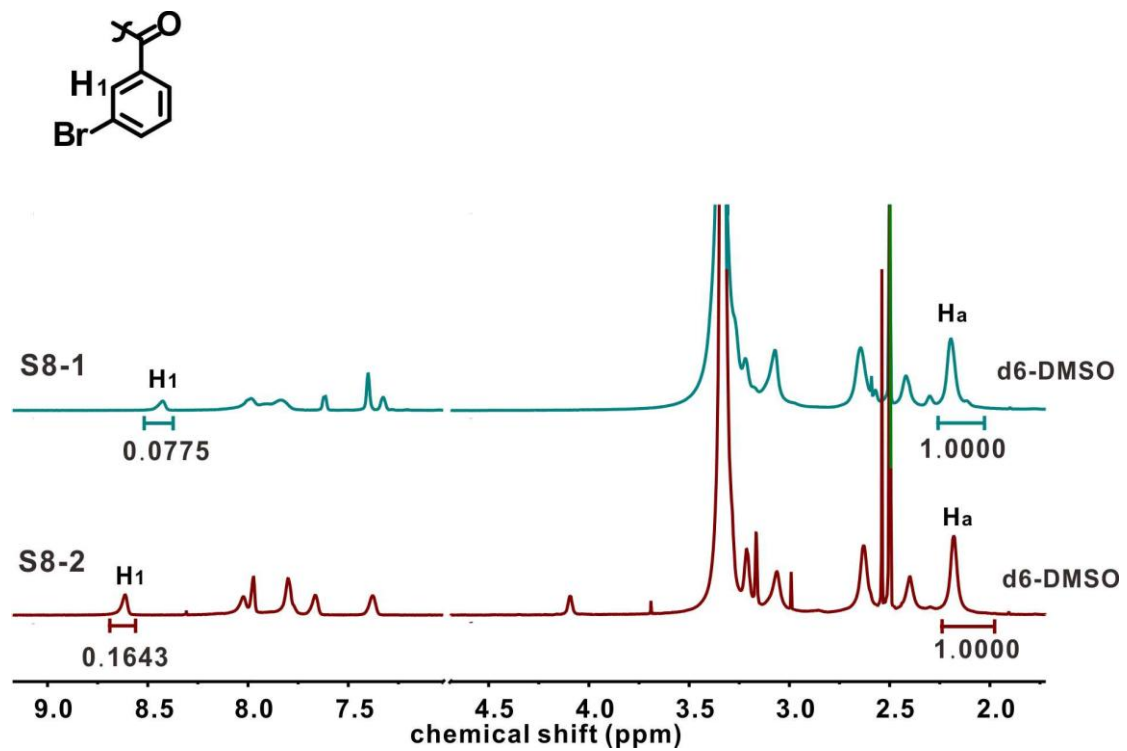

## Appendix B. Screening of efficient siRNA vectors in the library of surface-engineered dendrimers.

Gene silencing efficacy of the materials was tested with 50 nM siLuc in HeLa-Luc cells at different weight ratios (w/w=1-20) for 24 h. \*Represents the optimal material dose for each material in the gene silencing experiments. "T" indicates that the material is toxic on the transfected cells. The optimal material dose is chosen at which the highest gene silencing efficacy is achieved and the polyplex is not toxic on the transfected cells, in addition, the relative protein mass in each well should be above 80% compared to the non-treated cells.

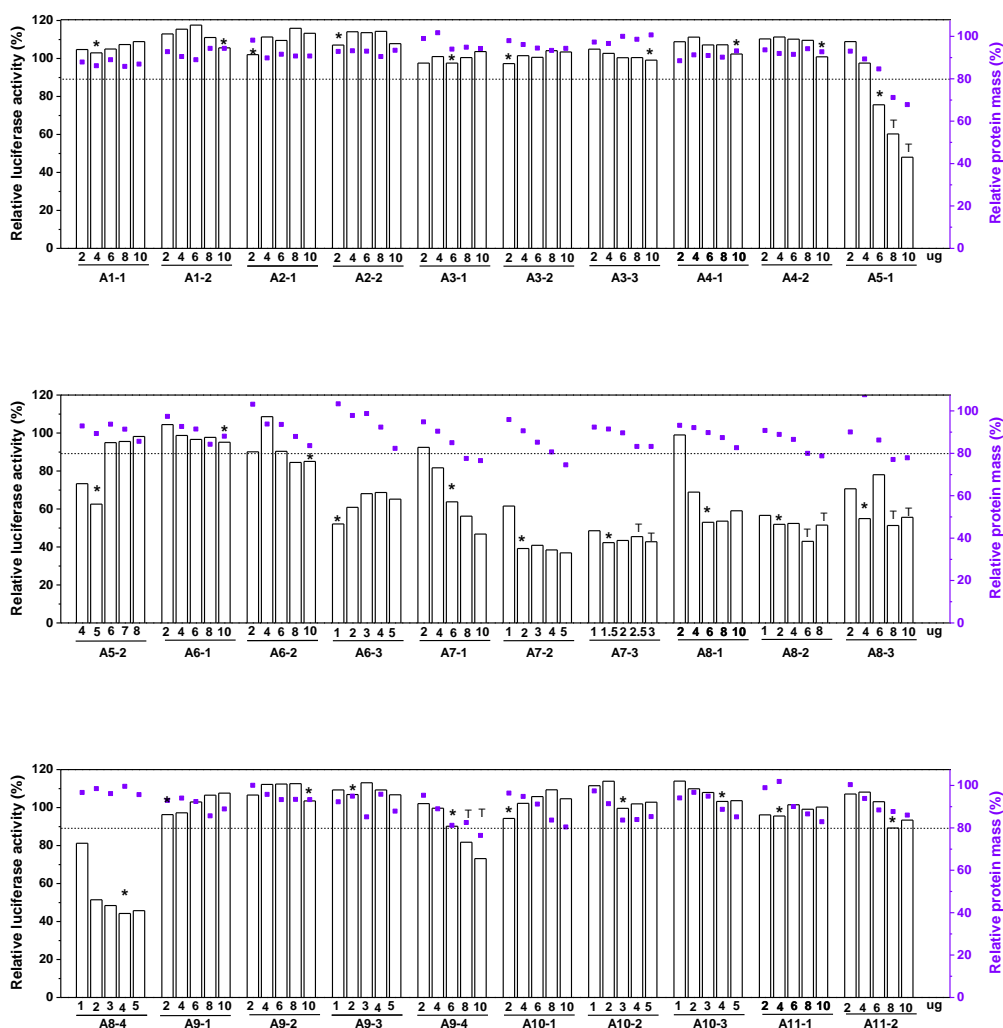

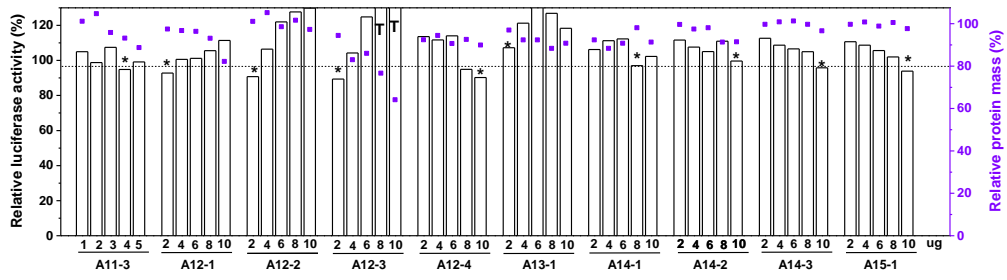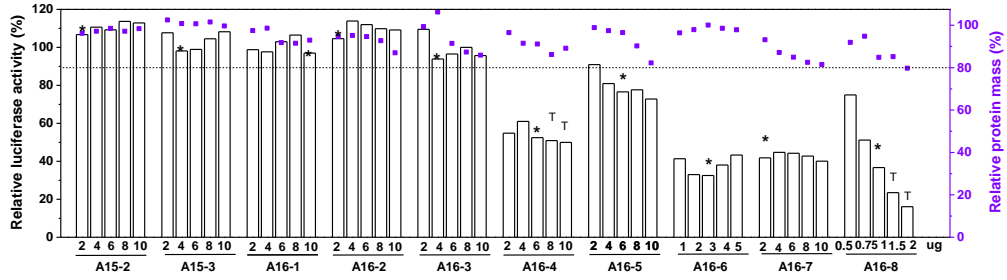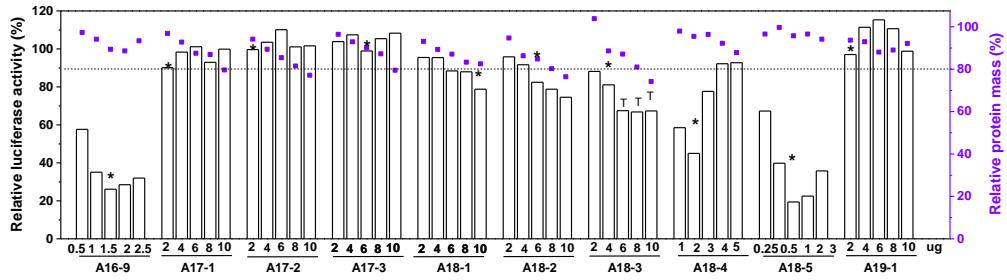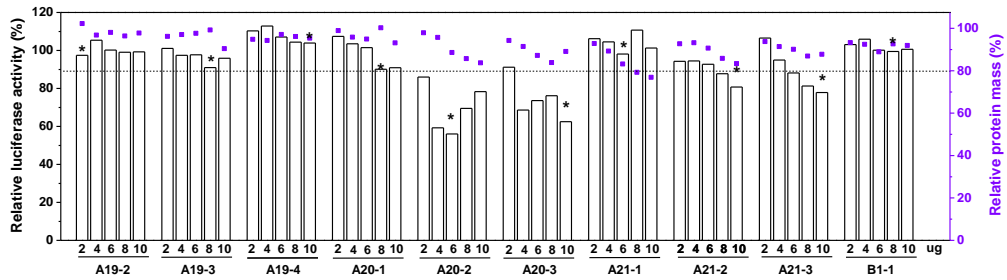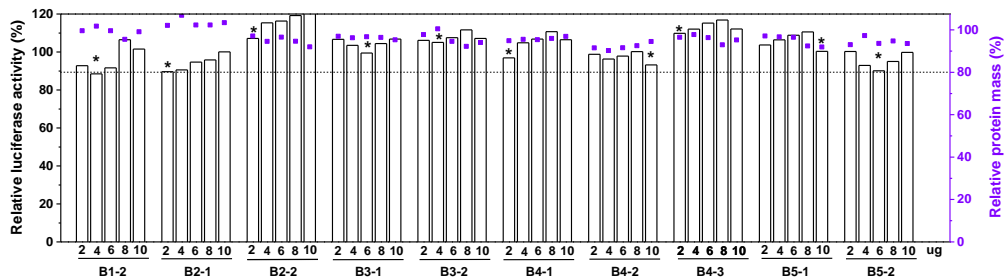

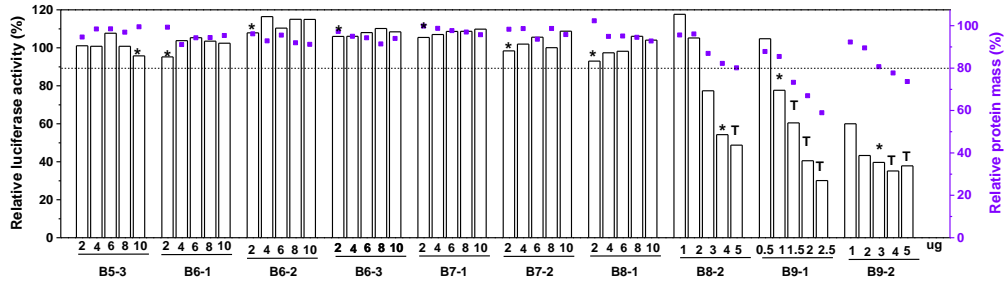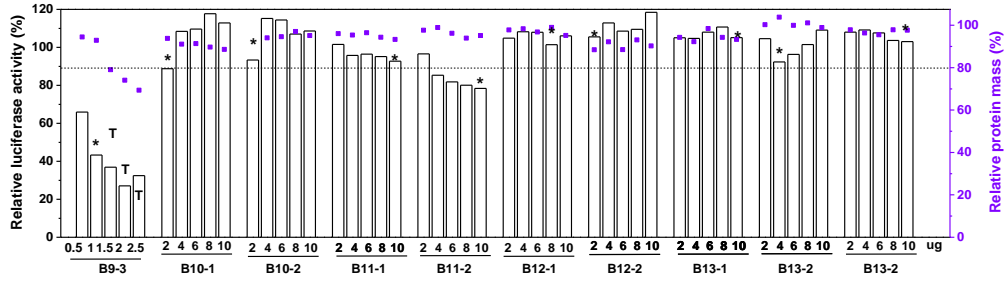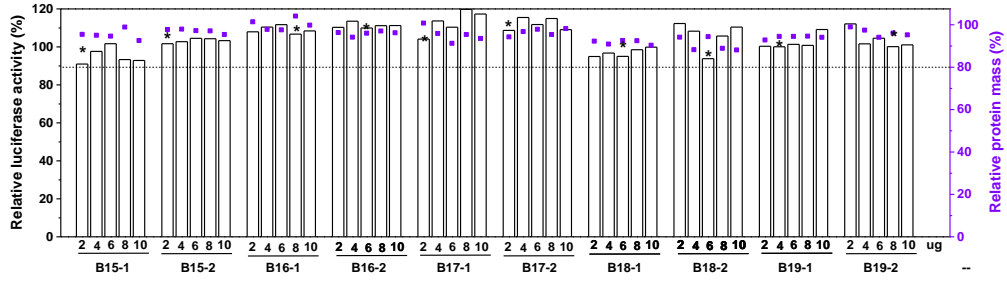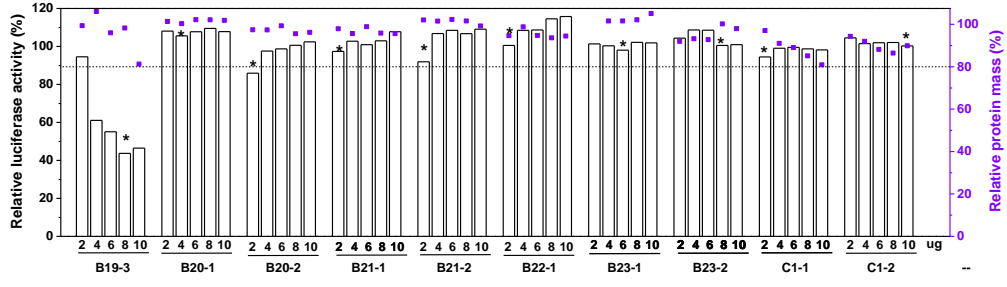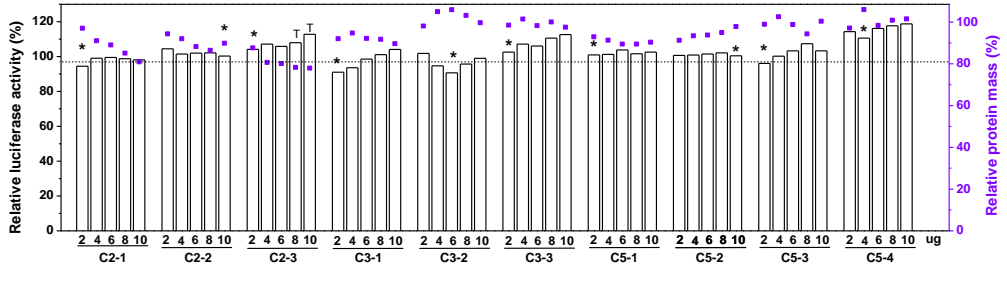

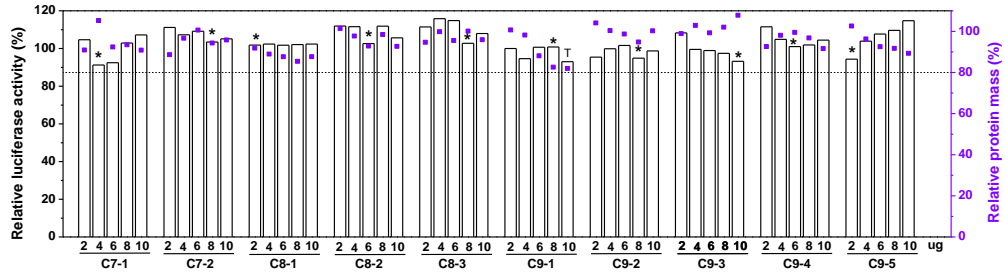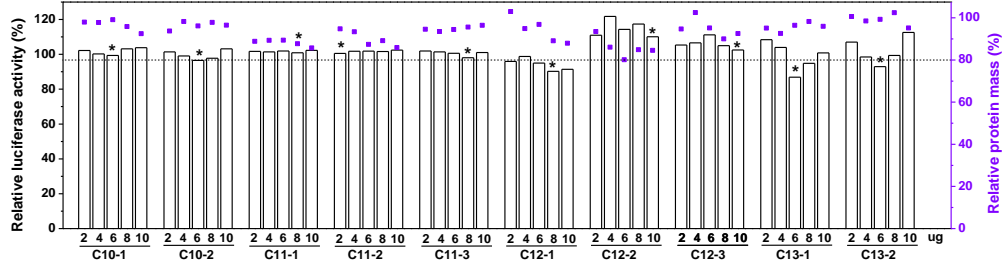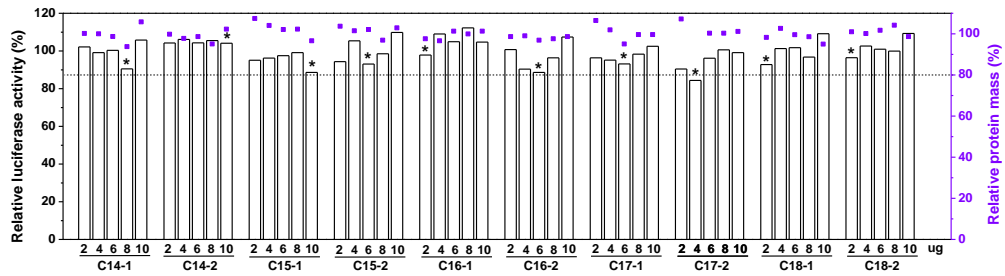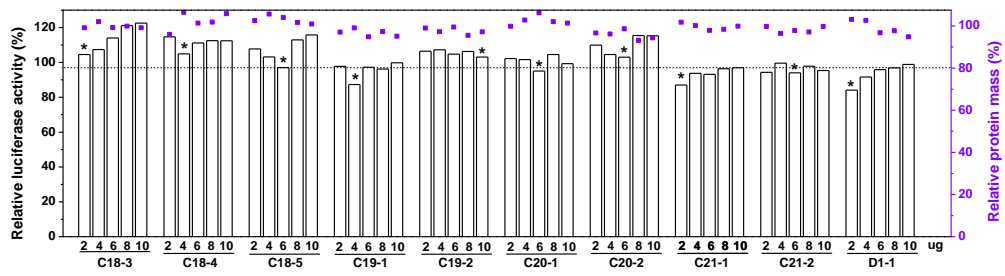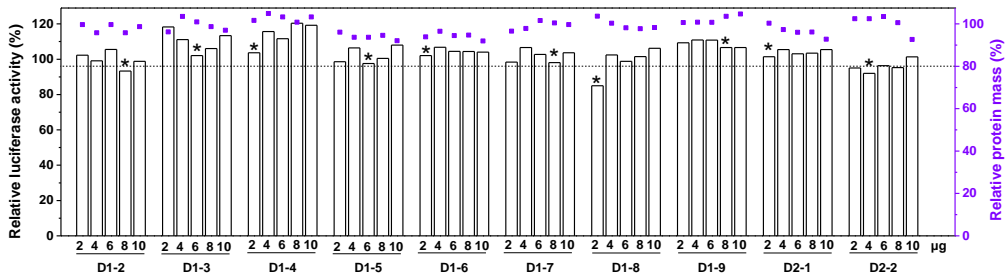

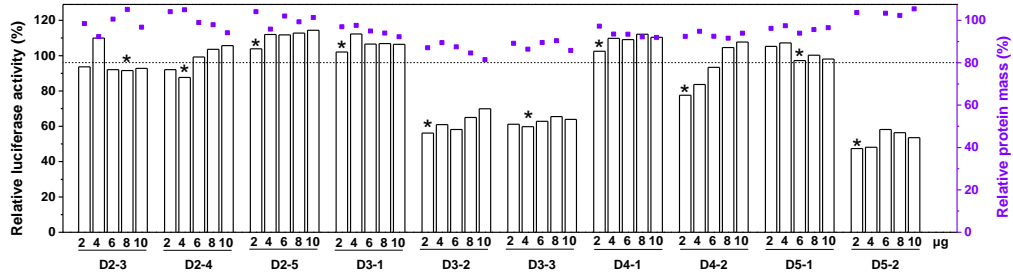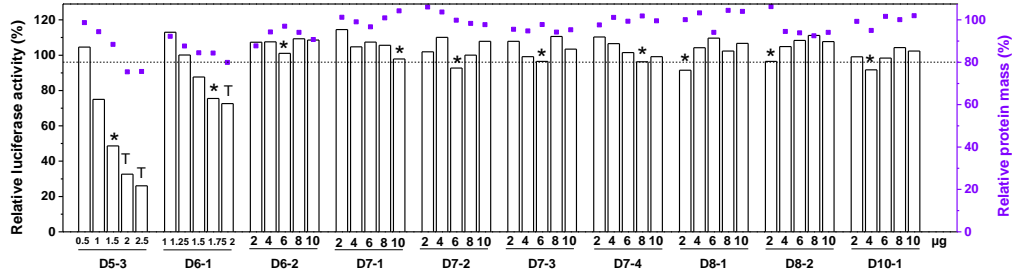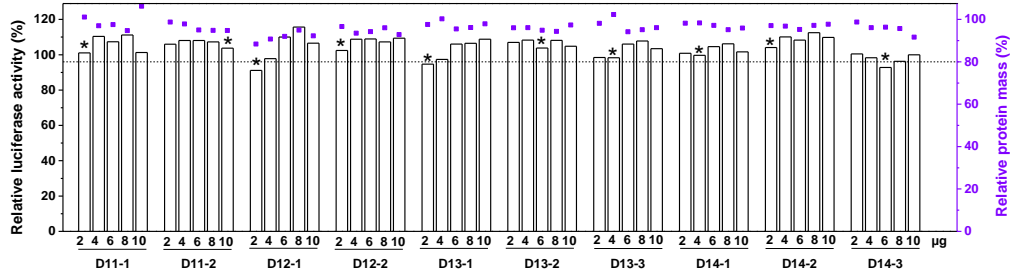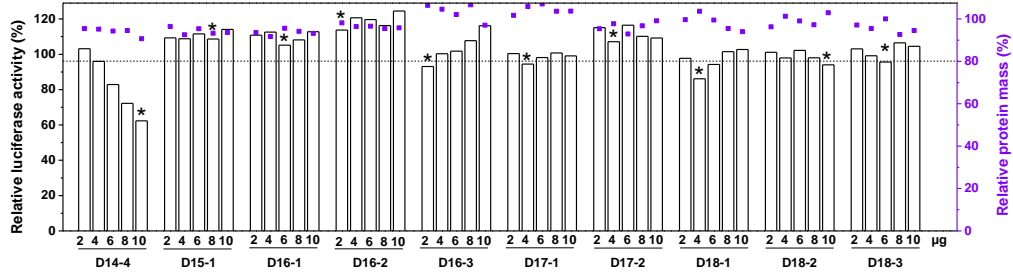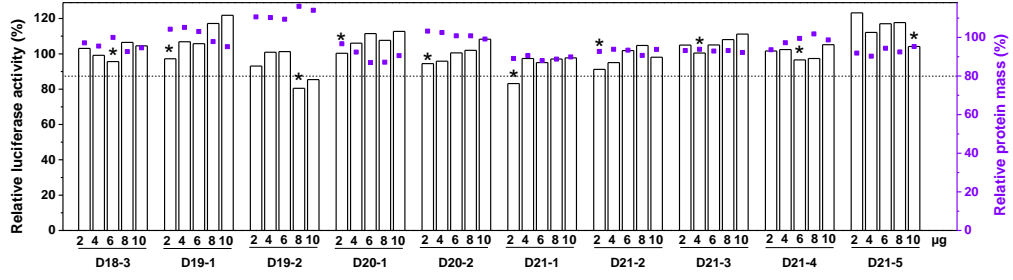

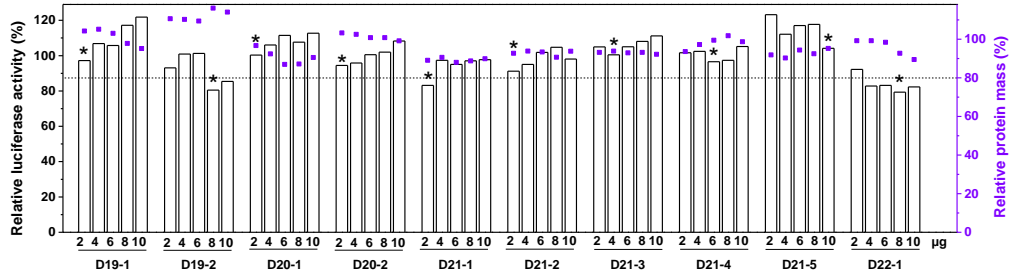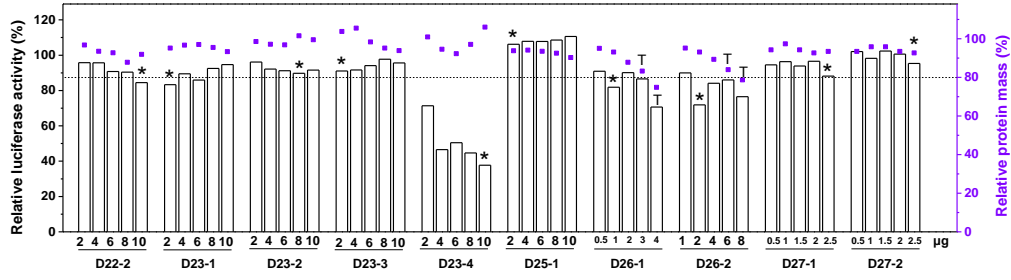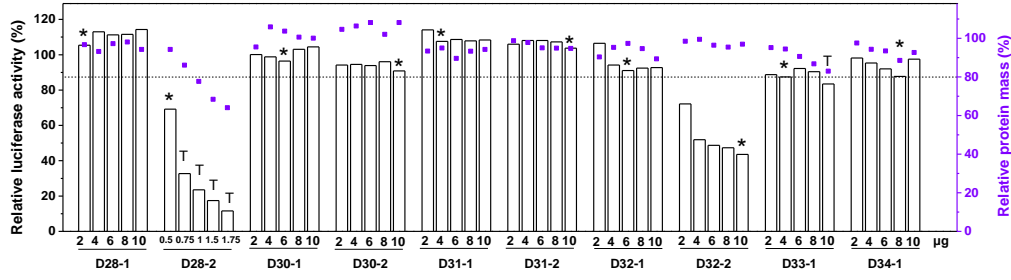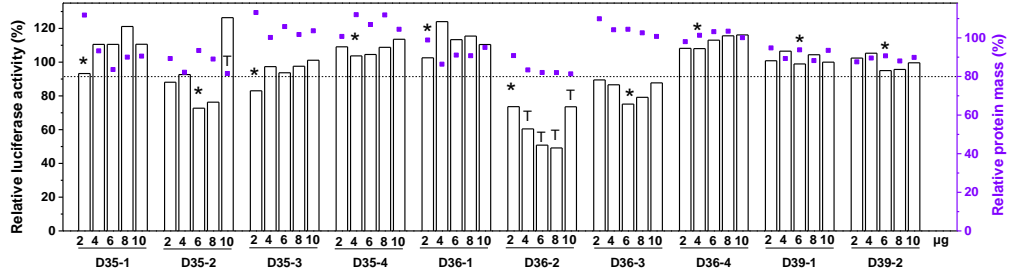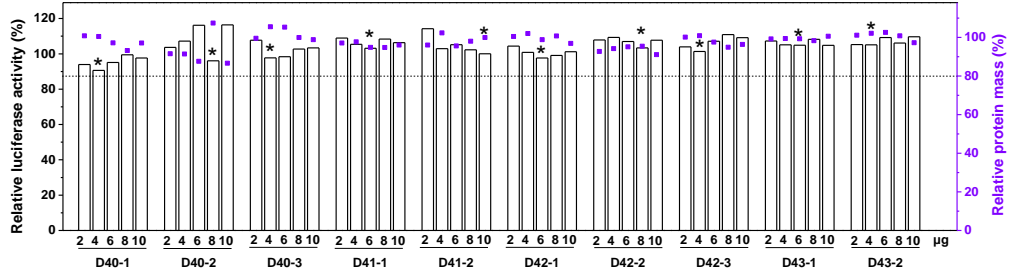



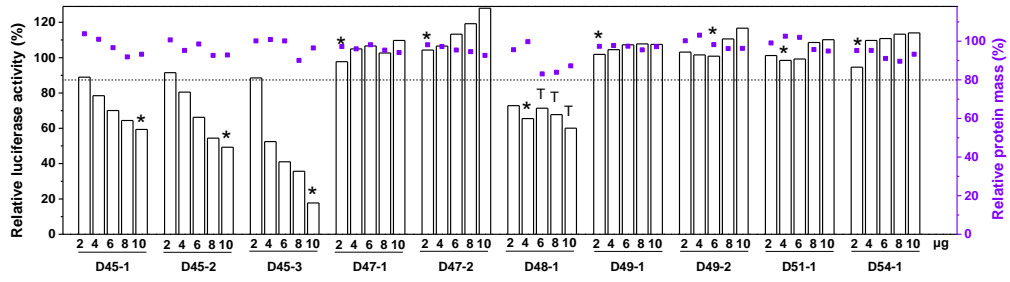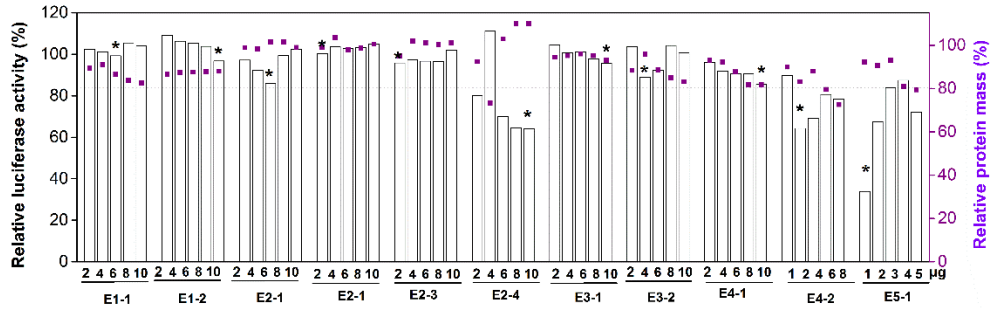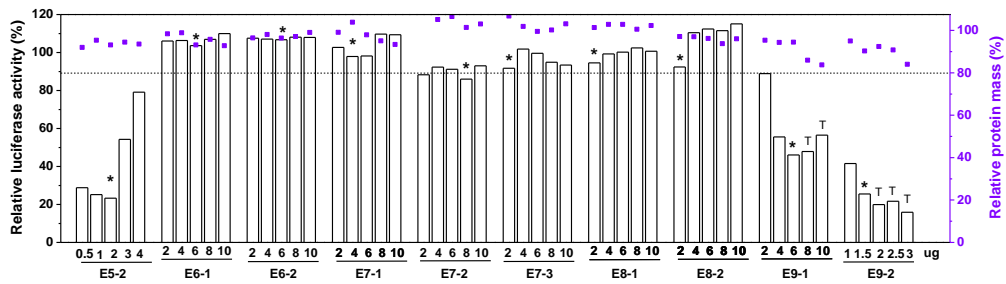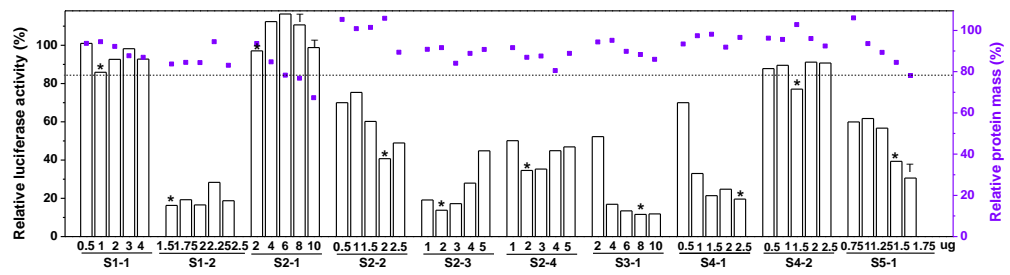

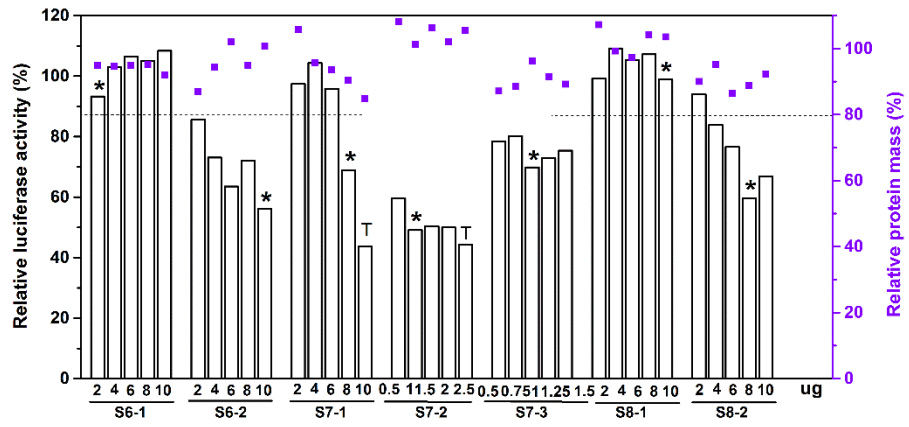

Supplement: srep25069-s1.pdf [file srep25069-s1.pdf]
